# Supplementary material for: 2011 Annual Report of the American Board of Psychiatry and Neurology, Inc.
Source: Atypon-hosted journal article supplement (doi:10.1176/appi.ajp.2012.169.8.877), 2012-08-01
Supplement: appi.ajp.2012.169.8.877.ds001.pdf [file appi.ajp.2012.169.8.877.ds001.pdf]

# American Board of Psychiatry and Neurology, Inc. (ABPN)

## Report on the 2011 Examinations

### Certification

*The following successfully completed the board examination in January 2011.*

---

#### Psychiatry

---

Frieda Aboul-Fotouh, M.D., Cambridge, MA  
Sandra Dewi Abramoff Moehadjir, M.D., Coralville, IA  
Daniel Joseph Abrams, M.D., Denver, CO  
Michael Scott Adragna, M.D., Providence, RI  
Masood Ahmad, M.D., Tulsa, OK  
Ernest Phil-Pepine Alaimalo, M.D., Pearl City, HI  
Nima Alinejad, M.D., Bossier City, LA  
James Michael Allen, M.D., Wellington, n/a  
Kartik Ananth, M.D., Palos Verdes Estates, CA  
Ara Anspikian, M.D., Los Angeles, CA  
Annelise Ximena Arze, M.D., Lubbock, TX  
Juan Antonio Avila, M.D., Minneapolis, MN  
Alicia Marcela Azpiri Magallanes, M.D., Medford, MA  
Joel Alan Badeaux, M.D., M.P.H., Mesa, AZ  
David Alan Bagley, M.D., Little Rock, AR  
Venkatasubramanian Baskararajan, M.D., Hattiesburg, MS  
Scott Richard Beach, M.D., Boston, MA  
Jeffrey Bernard Becker, M.D., Los Angeles, CA  
Erin Lechner Belfort, M.D., Cambridge, MA  
Caryn Ilyse Bernstein, M.D., Culver City, CA  
Steven Craig Blevins, M.D., Maumelle, AR  
Sally Ann Boeve, M.D., Tucson, AZ  
Paul Christopher Boulware, M.D., Scottsdale, AZ  
Roscoe Owen Brady Jr., M.D., Ph.D., Cambridge, MA  
Ripudaman Singh Brar, M.B.B.S., Walnut Creek, CA  
Henrike Brinker, M.D., Abingdon, VA  
Pamela Joy Broderick, M.D., Lynn Haven, FL  
Katherine Briggs Brownlowe, M.D., Rutland, VT  
Natalie Jill Brush-Strode, M.D., North Little Rock, AR  
Lee Samuel Bulgin, M.D., Johnston, RI  
Maya Joanna Bulman, M.D., Portland, ME  
Claudia Frances Califano, M.D., Guilford, CT  
Natalie Marie Campo, M.D., Nashville, TN  
Fabiola Claudia Cancino Ticona, M.D., Northampton, MA  
Maria Emma Rosa Castro Lacouture, M.D., Dublin, CA  
Jorge Alejandro Castro-Alvear, M.D., Canberra, ACT  
Gwyn M. Cattell, M.D., Ayer, MA  
James Celestin, M.D., Brooklyn, NY  
Lawrence Chingwell Chan, D.O., Alexandria, VA  
Andres M Chaparro, M.D., Boston, MA  
Jullynn Cabrera Chargualaf, M.D., Long Beach, CA  
Ashley Hope Chatigny, D.O., Clarksville, TN  
Tessa Lynn Chesher, D.O., Metairie, LA

Peter Lee Chien, M.D., Chicago, IL  
Paul Han-Bae Choi, M.D., Davis, CA  
Hsun-Hua Chou, M.D., San Diego, CA  
Jasen Andrew Christensen, D.O., Zuni, NM  
Warren Ritchie Christianson II, D.O., Houston, TX  
Ashley Lin Clark, M.D., La Jolla, CA  
Robert Takashi Cobb, M.D., Pasadena, CA  
Randi L. Cohen, M.D., Ph.D., Rockfall, CT  
Brandy Lynne Cohen-Brown, D.O., Santa Monica, CA  
James Curtis Collier, M.D., New Orleans, LA  
Willard Wesley Connor Jr., M.D., San Diego, CA  
Douglas Richard Cook, M.D., Carmel, IN  
Laura L Cruz-Hinson, M.D., Farmington, NM  
Erin Melissa Curtis, M.D., Madison, WI  
Cat Tran Manh Quyen Dang, D.O., Aliso Viejo, CA  
Ann Blair Davis, M.D., Santa Monica, CA  
Daniel Jason Debowy, M.D./PhD, Brookline, MA  
Kristina M Deligiannidis, M.D., West Brookfield, MA  
Bethany Joel DeRhodes, M.D., Apo, AP  
Ajinder Singh Dhatt, M.D., Houston, TX  
Lena Dhillon, M.D., American Canyon, CA  
Noami Machorro Diaz, M.D., Albuquerque, NM  
Alexander Dimitriu, M.D., Foster City, CA  
Brianna Marie Disabato, M.D., Saint Louis, MO  
Ashley Green Dorin, M.D., Bloomfield, CT  
Neel Ramesh Doshi, D.O., Irvine, CA  
Marina I Doulova, M.D., Forest Hills, NY  
Robert Rees DuRant IV, M.D., Mt Pleasant, SC  
Julie Ann Egli, M.D., Jefferson, MA  
Benjamin Ray Eliason, M.D., Bend, OR  
Aimee Martha Ellison, M.D., Redlands, CA  
Ashraf Mohamed Elmashat, M.D., Irvine, CA  
Katrine Enrile, M.D., Los Angeles, CA  
Roy Eyal, M.D., Berkeley, CA  
Helen Mavourneen Farrell, M.D., Cincinnati, OH  
Jane Mary Fernandez Schcolnik, M.D., Stockton, CA  
Reynald Joseph San Pedro Ferraz, M.D., Las Vegas, NV  
Jennifer Anne Victoria Ferrer, M.D., Diamond Bar, CA  
Michelle Ann Field-Chez, M.D., Highland Park, IL  
David Allen Fife, D.O., Gilbert, AZ  
David Matthew Finkelstein, M.D., Worcester, MA  
Deborah Sue Finklestein, M.D., Rancho Palos Verdes, CA  
Sofia Firoz, M.D., Upland, CA  
Karen Christine Floyd, D.O., Tucson, AZ  
Ryan Karl Carandang Fontanilla, M.D., Rock Springs, WY  
Dina Frid, M.D., Foster City, CA  
Srivalli Ganne, M.D., Ridgeland, MS  
Peter L Garcia, M.D., Santa Maria, CA  
Michelle Gavin, M.D., Glenview, IL  
Julie Ann Gedden, M.D., Los Angeles, CA  
David Savinien Gellman, M.D., Los Angeles, CA  
Hebert Georges, M.D., Randolph, MA  
Christina Jara Gesmundo, M.D., Saint Louis, MO  
Elizabeth Carolyn Gilday, M.D., Cincinnati, OH  
Kristine Munoz Glass, M.D., Yucca Valley, CA  
Eric John Goepfert, M.D., Dorchester, MA  
Michelle Dana Goldsmith, M.D., San Jose, CA  
Sylvia Gonzalez, M.D., Houston, TX  
Arun Kumar Gopal, M.D., Elverson, PA

Mia Dara Gore, M.D., Belmont, MA  
Ravinder Goswami, M.D., Saint Louis, MO  
Yan Grafman, M.D., Clovis, CA  
Jennifer Greenwold, M.D., Newton, MA  
David John Grelotti, M.D., Preston, CT  
Jantje Matthew Groot, M.D., Ventura, CA  
Anne Fanch Gross, M.D., Cambridge, MA  
Kevin Meis Guber, M.D., Chino Hills, CA  
Amit Kumar Gupta, M.D., Aiea, HI  
Renu Gupta, M.D., Brookline, MA  
Jee Hyun Guss, M.D., Concord, CA  
Andrew Todd Haber, M.D., Scottsdale, AZ  
Sandra Sunny Hah, M.D., Orange, CA  
Joshua M Hain, M.D., Teaneck, NJ  
Merita Halilhodzic, M.D., Santa Monica, CA  
Celine Alyssa Hamilton, M.D., Leeds, n/a  
Jeremy Armien Handy, M.D., Grand Forks, ND  
Brandi Allison Hankins, M.D., Little Rock, AR  
Dana Lynn Harris, M.D., Pacific Palisades, CA  
Justin Hauxwell, M.D., Golden, CO  
Davinder James Singh Hayreh, M.D., Saint Louis, MO  
Jennifer Rene Hersch, D.O., Long Beach, CA  
Bipinchandra Hirisave Krishna, M.D., North Mankato, MN  
Rachel Anya Hnatowich, M.D., Roxbury Crossing, MA  
Thomas Eugene Hoffman, M.D., Vacaville, CA  
Silvina Soledad Holasek, M.D., Ukiah, CA  
Douglas Brian Holl, M.D., Fontana, CA  
Andrew Clarke Horrigan, M.D., Lancaster, MA  
Mark Austin Howard, M.D., Boston, MA  
Omar Hashim Howard, M.D., Panama City Beach, FL  
Rex Wu Huang, M.D., Los Altos, CA  
Christina Mowkay Hui, M.D., Los Angeles, CA  
Sindhu Idicula, M.D., Houston, TX  
Jolomi Tubogbanimi Ikomi, M.D., Stamford, CT  
Shaily Jain, M.D., Las Vegas, NV  
Jevon J Johnson, M.D., Elk Grove, CA  
Shamalon Rondell Johnson, M.D., New Orleans, LA  
Cholet Kelly Josue, M.D., Towson, MD  
Mona Karimpour, D.O., Corona Del Mar, CA  
Anita Karnik, M.D., Cincinnati, OH  
Andrew Russell Kaufman, M.D., Fayetteville, NY  
Joseph Wiley Keene, M.D., Los Angeles, CA  
Joseph Christopher Kennedy, M.D., Tulsa, OK  
Joy Deann Kennedy, M.D., La Jolla, CA  
My Tang Kha, M.D., Orange, CA  
Nitin Arun Khadilkar, M.D., M.P.H., Yorktown, IN  
Imran Aziz Khan, M.D., Redding, CA  
Shaista Younus Khan, M.D., Sunnyvale, CA  
Tatyana Kharit, M.D., Los Angeles, CA  
Lara Maria Kierlin, M.D., Portland, OR  
Linda Uin Soo Kim, M.D., West Covina, CA  
Michael David Kisicki, M.D., Seattle, WA  
Steve Hyun Koh, M.D., San Diego, CA  
Hristina Kirilova Koleva, M.D., Iowa City, IA  
Philantha Sue-Hwa Kon, M.D., Ph.D., Los Angeles, CA  
Larisa Kononova, M.D., Kansas City, MO  
Michael Kornberg, M.D., La Jolla, CA  
Margarita Krasnova, M.D., Rancho Palos Verdes, CA  
Nishant Kumar, D.O., Newport Beach, CA

Shimul Ashok Kumbhani, M.D., Berkeley, CA  
Azad Paul Kurkjian, M.D., Los Angeles, CA  
Karla Teresa Lacayo, M.D., Carmichael, CA  
Michele Clarke LaRoe, M.D., San Antonio, TX  
Edward Lau, M.D., San Diego, CA  
Nicole Terese Lavelle, M.D., San Diego, CA  
Jeffrey Lawler, D.O., Claremont, CA  
Esther Seungeh Lee, M.D., Clayton, MO  
J. Elsa Lee, M.D., M.P.H., Newport Beach, CA  
Timothy Tien-Min Lee, M.D., Loma Linda, CA  
Melissa Jackson Lesca, M.D., Lutz, FL  
Dana Kathryn Levy, M.D., Encino, CA  
Richard M Lewis, M.D., Austin, TX  
Annie Sze Yan Li, M.D., Brooklyn, NY  
Jane Li, M.D., Redlands, CA  
Alexis Adams Link, M.D., Los Angeles, CA  
Lin Lu, M.D., Buffalo Grove, IL  
Jeanne Elena Maglione, M.D., Ph.D., San Diego, CA  
Rhanda Marie Mendoza Magsalin, M.D., Wichita, KS  
Lisamar Maldonado-Hernandez, M.D., Houston, TX  
Vikas Malik, M.D., Hartford, CT  
Carla Farah Mandili, M.D., Torrance, CA  
Shaheen Mansoor, M.D., Saint Louis, MO  
Katherine Brooke Martin, M.D., Jamaica Plain, MA  
Jeremy David Martinez, M.D., Los Angeles, CA  
Diego Luis Martinucci Canto, M.D., Chestnut Hill, MA  
Gary Maslow, M.D., Durham, NC  
Elizabeth Ruel Matern, M.D., Avon, CT  
Beatriz Amparo Mateus, M.D., Mesa, AZ  
James Bradley McConville, M.D., New Orleans, LA  
Gregory Gene McGowan, M.D., Fontana, CA  
Robert James McHale, M.D., Albemarle, NC  
Josephine King McNary, M.D., Los Angeles, CA  
Clifford Allen McNaughton, M.D., Wickenburg, AZ  
Jennifer Kathleen McWilliams, M.D., Coralville, IA  
Sunil Mehta, M.D., Ph.D., Los Angeles, CA  
Tina Rae Melendrez-Chu, M.D., Honolulu, HI  
Kanthi Menon, M.D., Sewickley, PA  
David Arthur Merrill, M.D., Ph.D., Los Angeles, CA  
Susan Hyun Ju Tomihama Mikami, M.D., Honolulu, HI  
Dilyana Nencheva Milev, M.D., Tupelo, MS  
Margaret Leftwich Miller, M.D., Pleasant Hill, CA  
Sean Augustine Minjares, M.D., Long Beach, CA  
Arif Khalil Mirza, M.D., Marion, AR  
Shalini Mishra, M.D., Kaneohe, HI  
Scott Christopher Morris, M.D., Jamaica Plain, MA  
Gina Rose Mosich, M.D., San Juan Capistrano, CA  
Philip Joseph Muller, D.O., Sioux City, IA  
Muhammad Irfan Munawar, M.D., Ellington, CT  
Kathryn Richell Murray, M.D., Los Angeles, CA  
Yaser Mushtaq, M.D., Avon, CT  
Jeffrey Nachbar, M.D., Northfield, CT  
Celeste Natalie Nadal, M.D., Boston, MA  
Navin Arun Natarajan, M.D., Hutchinson, MN  
Melissa Louise Nau, M.D., San Francisco, CA  
James Allen Nelson, M.D., Houston, TX  
Carolyn Nguyen, M.D., Huntington Beach, CA  
Paul Elliott Nicholas, M.D., Sonoma, CA  
Eric Ward Nolan, M.D., Elgin, IL

Olga Novik, M.D., Medford, MA  
Erika Lynn Nurmi, M.D., Ph.D., Los Angeles, CA  
Christine Akemi Obata, M.D., Fresno, CA  
Kristen Colleen Ochoa, M.D., M.P.H., Alhambra, CA  
Kehinde Abiola Ogundipe, M.D., New Haven, CT  
Scott Steven Orth, D.O., Alva, FL  
Monica Ikuko Oshita, M.D., Apo, AE  
Ariel David Otero, M.D., Somerville, MA  
Jeremy Wayne Owens, M.D., Ocean Springs, MS  
Christopher Martinez Palacios, M.D., Marblehead, MA  
Eliza Myung Park, M.D., Chapel Hill, NC  
Nishant Rajesh Patel, M.D., Bellevue, WA  
Pranav Patel, M.D., Orange, CA  
Shailesh Manubhai Patel, M.D., Atlanta, GA  
Nicholas Stadis Patniyot, M.D., Houston, TX  
Richard Todd Peterson, M.D., Edina, MN  
Margot Albeck Phillips, M.D., Boston, MA  
Edward Warren Pirok, M.D. Ph.D., Winnetka, IL  
Julie Ross Pittman, M.D. Ph.D, Dallas, TX  
Joseph Edward Podolski, D.O., Waukesha, WI  
Lilit Pogosian, M.D., Glendale, CA  
Laura Catherine Politte, M.D., Arlington, MA  
Maya Gopika Prabhu, M.D., Milford, CT  
Amit Prakash Pradhan, M.D., Salisbury, MD  
Serena Puga, M.D., Los Angeles, CA  
Troy Theodore Pulas, M.D., Brookline, MA  
Toni Lynn Pusateri, M.D., Seal Beach, CA  
Brian David Quint, M.D., Malden, MA  
Osman Qureshi, M.D., East Hartford, CT  
Rogerio Miranda Ramos, M.D., Mason City, IA  
Sanjay Sarikonda Rao, M.D., San Diego, CA  
Anita Dawn Red, M.D., Los Angeles, CA  
Christina Lee Rim, M.D., Long Beach, CA  
Rachel Rittman, M.D., Los Angeles, CA  
Thomas Rittman, M.D., Los Angeles, CA  
Kathleen R Rivera, M.D., Danbury, CT  
David Robert Ruecker, M.D., Encinitas, CA  
Stoyan Dimov Rusev, M.D., Highland, CA  
Amanda Meltzer Rush, M.D., Pittsburgh, PA  
Rachel Andrea Russo, M.D., Dallas, TX  
Victor Lincoln Ruterbusch, M.D., Kailua, HI  
Julie Mary Sadhu, M.D., Frankfort, IL  
Payam M. Sadr, M.D., Scottsdale, AZ  
Amber Lea Rohner Sakuda, M.D., Kahului, HI  
Amam Zafar Saleh, M.D., Tulsa, OK  
Jaroslava Salman, M.D., Los Angeles, CA  
Hossein Samadi, M.D., Los Angeles, CA  
Graham Coleman Scanlon, M.D., Palo Alto, CA  
Megan Beth Schabbing, M.D., Dublin, OH  
Elizabeth Merritt Schader, M.D., Mountain View, CA  
Ronald Barry Schneider, M.D., Shreveport, LA  
Randal Scott Scholma, M.D., Saint Louis, MO  
Marisol Aimee Segundo, M.D., Cambridge, MA  
Marvin David Seppala, M.D., Center City, MN  
Aparna Sharma, M.D., Naperville, IL  
Bryan Christian Shelby, M.D., New York, NY  
Raymone Kamel Shenouda, M.D., Hamden, CT  
Joseph Jerome Sheridan, M.D., La Mesa, CA  
Hoonhee Shin, M.D., Flushing, NY

I-Wei Shu, M.D., Ph.D., San Diego, CA  
Denis Shub, M.D., Phoenix, AZ  
Samina Siddiqui, M.D., Sugar Land, TX  
Benjamin Charles Silverman, M.D., Lexington, MA  
Evan Christopher Silvi, M.D., Rockford, IL  
Arthur Simen, M.D., Ph.D., Orange, CT  
Lucila Sloninsky, M.D., Los Angeles, CA  
Joseph Theodore Smith, M.D., New Haven, CT  
Rachel Jean Sowards, M.D., Nitro, WV  
Brooke Hansen Spanos, M.D., Los Angeles, CA  
Serena Roxane Srikureja, M.D., Tustin, CA  
Daniel Franklin Steigerwalt, M.D., Nolanville, TX  
Emily Fanya Stein, M.D., Los Angeles, CA  
Matthew Joseph Steiner, M.D., Atascadero, CA  
Karis Antonia Stenback, M.D., Apo, AE  
Camille Anita Stephenson, M.D., Akron, OH  
Catherine Marical Stinnett, M.D., Yorba Linda, CA  
Roderick Raymond Stuart, M.D., San Bernardino, CA  
Melissa Nicole Sullivan, M.D., Los Angeles, CA  
Charles William Surber, M.D., Malden, MA  
Rika Suzuki, M.D., Honolulu, HI  
Daniela Magda Tabacaru, M.D., San Diego, CA  
Claudia Adriana Taccir-Macias, M.D., El Paso, TX  
Laine Elizabeth Taylor, D.O., Sunny Isles Beach, FL  
Scott Seijiro Teraoka, M.D., Aiea, HI  
Smita Hiten Thakkar, M.D., Belmont, CA  
Jennifer Anitra Thomas, M.D., M.P.H., Chesapeake, VA  
Tavi Thongdy, M.D., Las Vegas, NV  
Anu Radha Thumuluri, M.D., Carmel, IN  
Garrick Gar Tong, M.D., Los Angeles, CA  
Michael Long Trieu, M.D., Boston, MA  
Atur Vikram Turakhia, M.D., Rancho Santa Margarita, CA  
John Robinson Turpin, M.D., West Monroe, LA  
Azeza Bano Uddin, M.D., Philadelphia, PA  
Satish Chandra Vallabhaneni, M.D., Waltham, MA  
Carlos Benjamin Vargas, M.D., Austin, TX  
Victor Johnson Vautrot, M.D., Alexandria, LA  
David Cuauhtemoc Villasenor, M.D., Arcata, CA  
Mark Joseph Viron, M.D., Arlington, MA  
Elizabeth Rose Visceglia, M.D., Brooklyn, NY  
John Hobart Wagner III, M.D., Shreveport, LA  
Syed Waliuddin, M.D., Lombard, IL  
Ava Bernadette Walton, M.D., Mililani, HI  
Kerry Ellen Wangen, M.D., Ph.D., Long Beach, CA  
William Avery Warnes, M.D., Shawnee, KS  
Brian Michael Waters, M.D., San Antonio, TX  
Wendy Joy Watson, M.D., Phoenix, AZ  
David Frederick Widitz, M.D., Iowa City, IA  
Ilse Ruth Wiechers, M.D., M.P.P., Hamden, CT  
Cynthia N Wilson, M.D., Manassas, VA  
David Ford Wilson, D.O., Morgan, UT  
Donovan Alan Wong, M.D., New York, NY  
Felicia Kuo Wong, M.D., Santa Monica, CA  
Rodney Kenji Yamaki, M.D., Aiea, HI  
Joseph Yeretsian, M.D., Boston, MA  
Katherine Marie Young, M.D., Needham, MA  
Genevieve Su-Nin Yu, M.D., Irvine, CA  
Haifeng Yu, M.D., Elk Grove, CA  
Xiaoling Zhu, M.D., Santa Clara, CA

*The following successfully completed the board examination in April 2011.*

---

## **Psychiatry**

---

Candace Adair, M.D., Atlanta, GA  
Olujimi Ayodele Adefisan, M.D., Blackshear, GA  
Ayo Roli Afejuku, M.D., Dallas, TX  
Lielanie Mae Aguilar, M.D., Pensacola, FL  
Nassima Ait-Daoud Tiouririne, M.D., Charlottesville, VA  
Opeoluwa Olabisi Akinnusi, M.B.C.H.B., Marietta, GA  
Mojeed Adeniyi Akintayo, M.D., Jacksonville, NC  
Eva Altobelli, M.D., Astoria, NY  
Zeynep Fatma Altun, M.D., Ph.D., New York, NY  
Anastasia Brown Alvarado, M.D., Lithonia, GA  
Saira Arif, M.D., Roanoke, VA  
Muhammad Ashfaq, M.D., Lexington, KY  
Dianne Marie Augelli, M.D., Kansas City, MO  
Andrea Janel Bandfield, M.D., Greenville, SC  
Elisabeth M Barclay, M.D., Atlanta, GA  
Shazia Basit, M.D., Owensboro, KY  
Patricia Christina Bauza, M.D., Washington, DC  
David Robert Beckert, M.D., Charleston, SC  
Sylvia Berrios-Reyes, M.D., San Juan, PR  
Margarita Bobonis Babilonia, M.D., Tampa, FL  
Elizabeth Scardino Booma, M.D., Cambridge, MA  
Banu Brar, M.D., Modesto, CA  
Stephen Joseph Bresseux, M.D., Bryant, AR  
Yanina Brayman, M.D., New York, NY  
Brian Tilden Briscoe, M.D., Crestwood, KY  
Karyn Leigh Brown, M.D., Nashville, TN  
Eugene Alton Burke Jr., M.D., Brooklyn, NY  
Connie Lea Calvert, D.O., Winston Salem, NC  
Mihai Caratas, M.D., Sandy Hook, CT  
Fernando Castro, M.D., Gainesville, FL  
Andrea Christine Chamberlain, M.D., Largo, FL  
Manoj Chandran, M.D., Louisville, KY  
Hong Chen, M.D., Gainesville, FL  
Elisa K Cheng, M.D., Belmont, MA  
Craig Thomas Morgan Chepke, M.D., Concord, NC  
Robert Bourke Christian, M.D., Chapel Hill, NC  
Cheryl McGary Cobb, M.D., Nashville, TN  
Joseph G. Coles, M.D., Goldsboro, NC  
Rachel Marian Collins, M.D., Evergreen, CO  
Tiffany Antoinette Cooke, M.D., Decatur, GA  
Joseph Adam Cousin, M.D., Lutz, FL  
Anibal I. Cravchik, M.D., Ph.D., Gaithersburg, MD  
Eric William Crowe, M.D., Birmingham, AL  
Nieves Cuervo, M.D., Hackensack, NJ  
Stephen Graham Cunningham, M.D., Norfolk, VA  
Julie Michelle Demetree, M.D., Gainesville, FL  
Nicole Dana DiRienzo, D.O., Haymarket, VA  
Jean Nerva Dortilus, M.D., New Rochelle, NY  
Tyanne Lee Dosh, M.D., Marquette, MI  
Denis Drubetskiy, M.D., Spring Valley, NY  
Gina Lynn Newsome Duncan, M.D., Martinez, GA  
Mark Benjamin Famador, M.D., York, PA  
Francelle Fanfan, M.D., Stuart, FL  
Thomas V. Fernandez, M.D., Hamden, CT

Deborah Ann Fernandez-Turner, D.O., Tucson, AZ  
April Louise Fields, M.D., Durham, NC  
Scott Robert Filippino, M.D., Apo, AE  
Lucy Demerjian Flynn, M.D., New Haven, CT  
Kira Fonbah, M.D., Birmingham, AL  
Jose Antonio Franco-Chaves, M.D., San Juan, PR  
Nadya Friedman, M.D., New York, NY  
Andrea Marie Fritschle, M.D., Savannah, GA  
Yazmin Fuentes Miranda, M.D., Appleton, WI  
Maaza Girma G-Amlak, M.D., Skokie, IL  
Steven Andrew Galati, M.D., Dover, DE  
Brandy Michelle Gallien, M.D., Dallas, TX  
Gretchen M Garcia, M.D., San Juan, PR  
Tanya Elizabeth Garvin, M.D., St Petersburg, FL  
Aeva Necolle Gaymon-Doomes, M.D., Washington, DC  
Irwin Gelman, M.D., Norwalk, CT  
Elizabeth Hale Gillespie, D.O., Baltimore, MD  
John Garabed Giragos Jr., M.D., Durham, NC  
Diana Sofia Glaccum-Gavagni, M.D., Key Largo, FL  
Meredith Owen Godwin, M.D., La Grange, NC  
Logan Gabriel Graddy, M.D., Durham, NC  
Gabriela Gregorian, M.D., Palmetto Bay, FL  
Caroline McIntosh Guerry-Lewis, M.D., Black Mountain, NC  
Constance Guille, M.D., Charleston, SC  
Joseph Leonard Gulino, M.D., Santa Monica, CA  
Gariane Phillips Gunter, M.D., Leesville, SC  
Ranjay Halder, M.D., Saint Petersburg, FL  
Jill Monique Harrison-Smith, M.D., Macon, GA  
Kimberly Elizabeth Hartney, M.D., Boston, MA  
Maryam Hashemi, M.D., Torrance, CA  
Colette Lucie Haward, M.D., New York, NY  
Kamran Hayel-Moghadam, M.D., Johnson City, TN  
Armistead Edmunds Henderer, M.D., Richmond, VA  
Jacqueline Linda Henschke, M.D., New Orleans, LA  
Brian Neal Hernandez, M.D., Alexandria, VA  
Miguel Rafael Hernandez, M.D., Yonkers, NY  
Roberto A Hernando, M.D., Miami, FL  
Sheri Lynn Hollander, M.D., Philadelphia, PA  
Pamela Jean Horn, M.D., Silver Spring, MD  
Marilyn Horvath, M.D., Miramar, FL  
Carolyn Jayne Howell, M.D., Columbia, MD  
Troy Douglas Howell, M.D., Tampa, FL  
Amy Laura Huberman, M.D., Pikesville, MD  
Raushanah Ivery Hud-Aleem, D.O., McDonough, GA  
Michael Webb Hughes, M.D., Talbott, TN  
Muhammad Zahid Husain, M.D., Hoover, AL  
Margaret K Husk, M.D., Louisville, KY  
Matthew Thomas Huska, M.D., Tampa, FL  
Iman Ollie Hypolite, M.D., Washington, DC  
Ryan Willis Ingram, M.D., Virginia Beach, VA  
Ibukun-Olu Akinyemi Isaacs, M.D., Waldorf, MD  
Mohammad Aminul Islam, M.D., Dr.P.H., Vestavia, AL  
Kristy Hendricks Jackson, M.D., Fairburn, GA  
George Mack Jacob, M.D., Greenville, SC  
Vina Bhatt Jain, M.D., Powdersville, SC  
Linda Marie Jasperse, M.D., Indialantic, FL  
Georges Jean-Pierre, M.D., Woodmere, NY  
Amal Jijakli, M.D., Louisville, KY  
Nadyah Janine John, M.D., Winterville, NC



Kyle Edwin Johnson, M.D., Springdale, AR  
Ashley Blackmon Jones, M.D., Columbia, SC  
Patricia Ann Jones, D.O., Decatur, GA  
Patricia Junquera, M.D., Miami, FL  
Muralidhar Kannan, M.D., Jeannette, PA  
Safaa Mohamed Gaber Kasem, M.D., Falls Church, VA  
Milissa Kaufman, M.D., Ph.D., Ayer, MA  
David Matthew Keller, D.O., Laurel, MD  
Nathaniel Arthur Keller, M.D., Davie, FL  
Arline M. Kenneth, M.D., Miami Beach, FL  
Richard Garrett Key, M.D., New York, NY  
Nina Khachiyants, M.D., Broadlands, VA  
Abdul Shakoor Khalid, M.D., Raleigh, NC  
Durre Nayab Khan, M.D., Richmond, VA  
Rizwan Khan, D.O., Columbus, GA  
Ali Khanmohamadi, M.D., New York, NY  
Eindra Khin Khin, M.D., Annandale, VA  
Tahir Nisar Khwaja, M.D., Richmond, VA  
Suzanna Frances Kitten, M.D., Greenville, NC  
Peter Lance Klinger, M.D., Medford, MA  
Rohit Robin Kohli, M.D., Charleston, SC  
Rajendra Prasad Koirala, M.D., Boardman, OH  
John Gregory Kupfner, M.D., Knoxville, TN  
Adetokunbo Alexander Ladenika, M.D., Roanoke, VA  
Catherine See-Ning Lee, M.D., Providence, RI  
Iva Lesniak, D.O., Middletown, NY  
Alvin Lee Lewis IV, M.D., Charleston, SC  
Jonson Job Lin, M.D., Philadelphia, PA  
Deep Lohia, M.D., East Elmhurst, NY  
Sonya Blanchard Longest, M.D., Greenville, NC  
John Lops, D.O., Brooklyn, NY  
Gene Sing Lui, D.O., Glen Ridge, NJ  
Rizwan A. Malik, M.D., Ashburn, VA  
Limore Maron, M.D., Fort Lauderdale, FL  
Sheetal Reddy Marri, M.D., Chicago, IL  
Michele Ille Martin-Maffucci, M.D., Statesville, NC  
Amelia Sika Mathew, M.D., Alpharetta, GA  
Andrea Leigh Maxwell, M.D., Seattle, WA  
Keith Hunter McCoy, M.D., Durham, NC  
Molly Kathleen McVoy, M.D., Cleveland, OH  
Eric Todd Meehan, M.D., Belton, TX  
Kelly Edward Melvin, M.D., Proctorville, OH  
Elizabeth Ruth Messulam, M.D., Augusta, GA  
Dion Short Metzger, M.D., Atlanta, GA  
John Joseph Mezzullo, D.O., New Bern, NC  
Ayesha Manzoor Mian, M.D., Arlington, VA  
Karen Denise Miles, M.D., Durham, NC  
Brian James Miller, M.D., MPH, Evans, GA  
Carly Jean Miller, M.D., Fernandina Beach, FL  
Anna Maria Molnar, M.D., Gainesville, FL  
Theodore Morgan II, M.D., Smyrna, GA  
Melanie Lynn Morin, M.D., Brandenburg, KY  
Fatin Talib Nahi, M.D., Bloomsburg, PA  
Christian DeMoine Neal, M.D., Elgin, SC  
Sarah Denise Neely, M.D., Atlanta, GA  
Mohammad Zafar Niazi, M.D., Bergenfield, NJ  
Pei-Huey Nie, M.D., San Gabriel, CA  
Niels Christian Samuel Nielsen, M.D., Pullman, WA  
Manfred K O Obi, M.D., Hillside, NJ

Oleksandr Osipchuk M.D., Ph.D., Lebanon, TN  
Kelly Noel Ownby, M.D., Seymour, TN  
Lauren Burr Ozbolt, M.D., Miami Beach, FL  
Sachin Patel, M.D., Ph.D., Nashville, TN  
Roger Edmond Patton, M.D., Birmingham, AL  
Ashley Vanessa Peak, M.D., Owensboro, KY  
Jessica Ann Pease Campbell, M.D., Valrico, FL  
Marjorie Nathan Person, M.D., Birmingham, AL  
Edward Paul Phinney, M.D., Langhorne, PA  
Marie Rosette Pierre-Louis, M.D., Oceanside, NY  
Clemlyn-Ann Aloysha Pollydore, M.D., Decatur, GA  
Channavajjala M Prasad, M.D., Ph.D., McLean, VA  
Sashi Putchakayala, M.D., Arlington, VA  
Sarah Anne Ralston, M.D., Durham, NC  
Asif Rashid, M.D., Bethel, CT  
Javaid Rashid, M.D., Brooklyn, NY  
Jonathan Matthew Raub, M.D., Rochester, NY  
Cynthia Kay Rector, M.D., Cookeville, TN  
Laura Ellen Griffith Reynolds, M.D., Lexington, KY  
April Carpenter Richardson, M.D., Lexington, SC  
Jennifer Marie Rodriguez, M.D., Rome, GA  
Leonardo Rodriguez, M.D., Gainesville, FL  
Jocelyn Roman, M.D., Branchburg, NJ  
Tokunboh Tinuola Rose, M.D., Charlotte, NC  
Anna Maria Riggio Rosen, M.D., New York, NY  
David Scott Rosenberg, M.D., New York, NY  
Ilyse Shara Rosenberg, D.O., Forest Hills, NY  
Anne Wanjiru Ruminjo, M.D., M.P.H., Washington, DC  
Corliss Ann Rupp, M.D., Snellville, GA  
Carlos R Saavedra Velez, M.D., New York, NY  
Eliana Santoro, M.D., Columbia, MD  
Seleem Assad Sayyar, M.D., Savannah, GA  
Alan Daniel Schlechter, M.D., New York, NY  
Andres Ricardo Schneeberger, M.D., Bronx, NY  
Miriam Naomi Schultz, M.D., New York, NY  
Cessar Lenia Scott, M.D., Frederick, MD  
Jamie Suzanne Scott, D.O., Forest Hills, NY  
Gloria Jia Seo, M.D., Englewood Cliffs, NJ  
Malika I. Seth, M.D., New York, NY  
Scott H Shaffer, M.D., New York, NY  
Pheston Gray Shelton IV, M.D., Reidsville, NC  
Paula A Sherman, M.D., Chapel Hill, NC  
Shigefumi Shibata, M.D., Palo Alto, CA  
Hilaire Shongo-Hiango, M.D., Stone Mtn, GA  
Elizabeth Mary Shumann, M.D., Broomfield, CO  
Arman Haider Siddiqui, M.D., Fishers, IN  
Balveen Singh, D.O., West Nyack, NY  
Melanie E Sisti, M.D., New York, NY  
Ryan C. Smith, M.D., Burtonsville, MD  
Maged Sobhy Soliman, M.D., Islip, NY  
Sachdev Somiah, M.D., Kingsport, TN  
Erin Vanessa Spearman, M.D., Martinez, GA  
Joseph G Squitieri, D.O., Brooklyn, NY  
Alayna Noelle Stepter, M.D., Atlanta, GA  
Thomas David Stoss, M.D., Johnson City, TN  
Raymond Edwin Suarez, M.D., Yonkers, NY  
Abdul Subhan, M.D., Fishers, IN  
Andre Sullivan, M.D., Clearfield, UT  
Sumana Suresh, M.D., Fredericksburg, VA

Clifford Jon Sussman, M.D., Washington, DC  
Wajiha Fatima Syed, M.D., Alpharetta, GA  
Inna Taller, M.D., Potomac, MD  
Aleksey Ten, M.D., Forest Hills, NY  
Shruti Tewari, M.D., Annandale, VA  
Kirstin Isobel Thode, M.D., Alexandria, VA  
Mary J. Thomas, M.D., East Northport, NY  
Rachel Elizabeth Thommen, M.D., Davidson, NC  
Qionna Mariel Tinney Railey, M.D., Durham, NC  
Luis E. Torres, M.D., Eustis, FL  
Leslie Aaron Tsang, D.O., Vallejo, CA  
Mary Elizabeth Turner, M.D., Prospect, KY  
Tomrul Tuzel, M.D., Fort Salonga, NY  
Alejandra Valencia, M.D., New York, NY  
Murtuza M. Vali, M.D., Dartmouth, MA  
Daniel Varon, M.D., Miami, FL  
Evelyn Rose Vento, M.D., Richmond Hill, GA  
Jose P. Vito, M.D., New York, NY  
Sarah Ellen Volk, M.D., Chapel Hill, NC  
Niloni Harshad Vora, M.D., Avon, CT  
Diane Wagner, M.D., Islip, NY  
Eva Waimeo, M.D., Farmington Hills, MI  
Jaswinder Kaur Walia, M.D., Hamden, CT  
Sala Suzette Webb, M.D., Henrico, VA  
Trina Hope Webb, M.D., Gainesville, FL  
Kent Norman Wenger, M.D., Gainesville, FL  
Amanda S. Whiteley, M.D., Austin, TX  
Kelita Wiley, M.D., Stone Mountain, GA  
Jacqueline Nicole Williams, M.D., Augusta, GA  
Fatema Willis, M.D., Plano, TX  
Elizabeth Caroline Winter, M.D., Baltimore, MD  
Amanda Johnson Winters, M.D., Palmyra, VA  
Larisa Yelunina, M.D., West Hartford, CT  
Cara Marie Yergen, M.D., Key West, FL  
Gebrehana Woldesenbet Zebro, M.D., Alexandria, VA  
Jianping Zhang, M.D., Ph.D., Great Neck, NY  
Jill M. Zinner, M.D., Louisville, KY

*The following successfully completed the board examination in June 2011.*

---

## **Psychiatry**

---

Huma Abbas, M.D., Naperville, IL  
Kamala Sundari Adury, M.D., Seven Hills, OH  
Mehvesh Afrina, M.D., Richardson, TX  
Sanjay Agarwal, M.D., Madison, WI  
Matthew Lee Agius, M.D., Georgetown, TX  
Christina Maria Agustin, M.D., Issaquah, WA  
Aneela Ahmed, M.D., Lafayette, CA  
Jalees Ahmed, M.D., Farmingdale, NY  
Sadaf Ahmed, M.D., East Meadow, NY  
Syed Mahtabuddin Ahmed, M.D., Fredericksburg, VA  
Felicia Ayodeji Akingbala, M.D., Houston, TX  
Joseph Alimasuya, M.D., Clovis, CA  
Virginia Lou Allen, M.D., Houston, TX  
Albert Philip Allick, M.D., Bemidji, MN  
Imad Alsakaf, M.D., Omaha, NE  
Roderick Terrence Alston, M.D., Plymouth, MN  
Miguel Angel Dario Alvarelos, M.D., Santa Maria, CA

Jaina Indukumar Amin, M.D., Westlake, OH  
Shetal Mahesh Amin, M.D., Houston, TX  
Gustavo Adolfo Angarita, M.D., Brookline, MA  
Dorian Yelena Aponte-Soto, M.D., Frisco, TX  
Carolina Arevalo, M.D., Charlotte, NC  
Raman Arora, M.D., Seattle, WA  
Bradford Clifford Ashley, M.D., Sherwood, OR  
Jimmy N Avari, M.D., Norwood, NJ  
Stephanie Anne Axman, M.D., Portland, OR  
Katherine Katholos Babington, M.D., Seattle, WA  
Margaret Balfour, M.D., Ph.D., Dallas, TX  
Valdesha L. Ball, M.D., Bellaire, TX  
Donald Banik, D.O., Mililani, HI  
Lindy K Bankes, M.D., San Angelo, TX  
Christopher Scott Barnett, M.D., Yuba City, CA  
Amy Vanessa Barnhorst, M.D., Sacramento, CA  
Rebecca Ida Bay, M.D., Kirkland, WA  
Brian Kenneth Berendes, M.D., Madison, WI  
Omri Berger, M.D., San Francisco, CA  
Shana Ariel Berger, M.D., Fredericksburg, VA  
Jonathan Daniel Birkrant, M.D., Aspen, CO  
Vivek Singh Bisen, D.O., New York, NY  
Judy L Blair, M.D., Oakland, CA  
Kate Hanna Blumner, M.D., Portland, OR  
Alina Bouza, M.D., Kent, WA  
Beth Margaret Brandenburg, M.D., Plymouth, MN  
Manjinder Kaur Brar, M.D., Seattle, WA  
Carolyn J Brenner, M.D., Seattle, WA  
Lesley Thompson Brodie, M.D., Manchester, VT  
Timothy Joseph Buckley, M.D., Oak Park, IL  
Jeffrey Jalandoni Buenjemia, M.D., San Jose, CA  
Clayton Matthew Bullock, M.D., Ph.D., San Francisco, CA  
Mary Kay Burris, M.D., Salt Lake City, UT  
Andrew Butchart, D.O., New Berlin, WI  
Barika Marise Butler-Quarles, M.D., Grosse Pointe Park, MI  
Maria Alavanja Caggiano, M.D., Portsmouth, VA  
Jennifer Brown Campagna, M.D., Cazenovia, NY  
Alicia Marvette Cardona, M.D., Lawrence, KS  
Margaret Sheppard Cary, M.D., M.P.H., Portland, OR  
Ravi Chandra, M.D., San Francisco, CA  
Yufang Jennifer Chang, M.D., M.P.H., Austin, TX  
Adriana Maria Chaur, M.D., Dumont, NJ  
Arthur Arrit Chavason, M.D., Dallas, TX  
Laurie Lo-Yi Chen, M.D., San Francisco, CA  
Soo Young Chong, M.D., Houston, TX  
Philip Hosuk Chung, M.D., Tacoma, WA  
Jessica Anne Clarke, M.D., Ph.D., Portland, OR  
Juan-Carlos Cleves-Bayon, M.D., Branford, CT  
Robert Daniel Colucci, D.O., Shoreham, NY  
Joseph J Cooper, M.D., Chicago, IL  
Benjamin Coplan, D.O., De Pere, WI  
LaRae Meschelle Copley, M.D., Columbus, OH  
Anthony Raymond Cordaro Jr., M.D., Westminster, CO  
Whitney Watson Daniels, M.D., San Diego, CA  
Gautam Datta, M.D., Chesterfield, MO  
Umee Davae, D.O., Wadsworth, IL  
Christopher Michael Davidson, M.D., Sioux Falls, SD  
Dirk de Brito, M.D., La Canada, CA  
Charles Eliot deGravelles, M.D., Dallas, TX  
Amad Ud Din, M.D., Mission, KS  
Lisa Michelle Doguet, M.D., Beaumont, TX  
Jacob Burton Doris, M.D., Reno, NV

Holly Colleen DuBois, M.D., San Antonio, TX  
Liisa Elina Durchman, M.D., Mukilteo, WA  
Vikas Duvvuri, M.D., Ph.D., La Jolla, CA  
James V. Dyers Jr., D.O., Minooka, IL  
Sonni Patrice Elliott, M.D., Kansas City, MO  
Amy Elizabeth Ellis, M.D., Littleton, CO  
Gayle Kathryn Ely, M.D., Olympia, WA  
Joanna Marguerite Epstein, M.D., San Francisco, CA  
Bradley Lief Erickson, M.D., Oconomowoc, WI  
Lori Jo Esprit, M.D., Fargo, ND  
Amit Etkin, M.D., Ph.D., Stanford, CA  
Cody Jon Evans, M.D., Beaverton, OR  
Jason Evans, M.D., Harlingen, TX  
Nathan Paul Fairman, M.D., Sacramento, CA  
Pantea Farhadi, M.D., Los Angeles, CA  
Caron Elizabeth Farrell, M.D., Ph.D., Austin, TX  
Arianne Michele Ferguson, M.D., New Orleans, LA  
Rheinila Fernandes, M.D., Somerville, MA  
Travis Jeron Fisher, M.D., Milwaukee, WI  
Iljje Kim Fitzgerald, M.D., Santa Monica, CA  
Dallas Meacham Fleming III, M.D., Denver, CO  
Kristen Freier, M.D., La Crosse, WI  
Wendy Michelle Froehlich, M.D., San Mateo, CA  
Erin Nancy Fry, D.O., Colorado Springs, CO  
Arvinder Pal Singh Gagneja, M.D., Fargo, ND  
Phillip Douglas Gale, D.O., Salt Lake City, UT  
Kristina Daina Gawor, M.D., Chicago, IL  
Ashiq Mathew George, M.B.B.S., Oakland, CA  
Nataliya Giagou, M.D., Vacaville, CA  
Raja Singh Gill, M.D., Oak Brook, IL  
Brooke Allison Goldner, M.D., Huntington Beach, CA  
Lizmarie Gonzalez Vega, M.D., Helotes, TX  
Stacey Burpee Gramann, D.O., Portland, OR  
Steven Todd Grandt, M.D., Brainerd, MN  
Nancy Victoria Graves, M.D., Texarkana, TX  
Inder Raj Kaur Grewal, M.B.B.S., Edina, MN  
Chinmoy Gulrajani, M.D., New York, NY  
Anjum Afshan Handoo, M.D., Ann Arbor, MI  
Jonathan R. Harbin, M.D., Portland, OR  
Rachel Marie Harlan Link, M.D., Springfield, IL  
Rebecca Harrison, M.D., Milwaukee, WI  
Linda Green Harvey, M.D., Atlanta, GA  
Nicholas Michael Hatzis, M.D., Chicago, IL  
Leigh Austin Hedrick, M.D., Portland, OR  
Danielle Bedell Henson, M.D., Overland Park, KS  
Joshua Wade Hogins, D.O., Saint Louis, MO  
Kelly Anne Holes-Lewis, M.D., Daniel Island, SC  
Kevin C. Holmes, M.D., Holladay, UT  
Dina Hooshyar, M.D., Dallas, TX  
Kelly Houck, M.D., Johnson City, TN  
Frederick William Houts, M.D., Anchorage, AK  
Svetoslav Plamenov Hristov, M.D., Fargo, ND  
Bonnie Suzanne Huber, M.D., Clarksville, TN  
Noor Fatima Husain, M.D., Bartlett, IL  
Barbara Huynh, D.O., Arcadia, CA  
Mitchell Louis Illichmann, M.D., Madison, WI  
Mark Walter Imig, M.D., Rochester, MN  
Zlatin Stoyanov Ivanov, M.D., New York, NY  
Jeremy Allen Jensen, M.D., Great Falls, MT  
Deanna Rae Johnson, M.D., Anchorage, AK  
Christina Ann Joy, M.D., New York, NY  
Sule Karakus, M.D., Gig Harbor, WA

Emilia Paulina Kaufman, M.D., Westwood Hills, KS  
Yvette Rene Kaunismaki, M.D., Sparks, NV  
Brooks Ryan Keeshin, M.D., Cincinnati, OH  
Farhan Masrur Khan, M.D., El Paso, TX  
Richard Ki Kim, M.D., Fredericksburg, VA  
Shannon Kinnan, M.D., Gretna, NE  
Soberekon Melvin Koko, M.D., Burr Ridge, IL  
Roshni Lani Koli, M.D., Honolulu, HI  
Susanna Kovari, M.D., Oak Park, IL  
Mary-Anne Otilie Kowol, M.D., Tulsa, OK  
Vibha Kurdikar, M.D., Vernon Hills, IL  
Travis Michael Lajoie, D.O., Portland, OR  
Bajazeda Lakisic-Kazazic, M.D., Los Altos, CA  
Chad Michael Lemaire, M.D., Houston, TX  
Levi Chen-Wah Leong, M.D., Saint Croix Falls, WI  
Lucy Pei-Ju Liao, M.D., Santa Monica, CA  
Benjamin Joshua Lipman, D.O., Denver, CO  
Moira Locke, M.D., Anaheim, CA  
Christopher Joseph Logan, M.D., Tampa, FL  
Robert John Long, M.D., Anchorage, AK  
Ante Luburic, M.D., Kensington, CA  
Matthew Macaluso, D.O., Wichita, KS  
Hossam Mohammad Mahmoud, M.D., Chicago, IL  
Larry Wei Mak, M.D., Portland, OR  
Alyson Elizabeth Maloy, M.D., New York, NY  
LaKeisha DeeAnn Marsh, M.D., Fort Worth, TX  
Jodi F Marshall, M.D., Hampton, NH  
Zoe Allen Martinez, M.D., Ph.D., Sausalito, CA  
Karen Ashby Mathewson, M.D., Brooklyn, NY  
Mir Nadeem Mazhar, M.D., Kingston, ON  
Carrie McAdams, M.D., Plano, TX  
Eileen Kerin Kilmartin McCarty, M.D., Portland, OR  
Vanessa Angela McDonald, D.O., Portland, OR  
Damian Matthew McGovern, M.D., Nashville, TN  
Scot McKay, M.D., Denver, CO  
Adrian Billote Medina, M.D., Scottsdale, AZ  
Brian Longhurst Merrill, D.O., Logan, UT  
Travis Scott Mickelson, M.D., Salt Lake City, UT  
Jason Clay Miller, D.O., San Antonio, TX  
Steven Craig Miller, M.D., Stillwater, MN  
Kalpana Miriyala, M.D., Huntington, WV  
Zoobia Mirza, D.O., Lawton, OK  
Sukriti Mittal, M.B.B.S., White Plains, NY  
Shanthi Mogali, M.D., New York, NY  
Jules G Molina, M.D., Lubbock, TX  
R. Christopher Moore, M.D., Pensacola, FL  
Lenton Joby Morrow, M.D., Davis, CA  
Yuki Mukai, M.D., Wall Township, NJ  
Abby L. Mulkeen, M.D., New Haven, CT  
Sunita Muranjan, M.D., East Lansing, MI  
Theodore M Murray, M.D., Somerville, MA  
Willow Nicole Naimark, M.D., Portland, OR  
Sandhya Gopinathan Nair, M.D., San Ramon, CA  
Marina Nakic, M.D., Ph.D., New Haven, CT  
Kevin Michael Nasky, D.O., Kailua, HI  
Petrit Ndrio, M.D., Chicago, IL  
Stacy Lynn Neff, D.O., Collinsville, IL  
Katharine Joyer Nelson, M.D., Lauderdale, MN  
Milena Patel Newhook, D.O., Houston, TX  
Alison Winesett Newman, M.D., Sacramento, CA  
William Jarred Newman, M.D., Sacramento, CA  
Harrison Nguyen, M.D., Arlington, VA

Milap Anil Nowrang, M.D., M.Be., Takoma Park, MD  
Carlos Ernesto Nunez, M.D., Vancouver, BC  
Paul James O'Leary, M.D., Birmingham, AL  
Michael Brendan O'Sullivan, M.D., B.C.h, B.A.O., Saint Paul, MN  
Shawn Mojica Odothan, M.D., Henderson, NV  
Ihuoma Nicole Okezie, M.D., Gaithersburg, MD  
Elishia Mone Lintz Oliva, M.D., Denver, CO  
Mario Christopher Oliva, M.D., Sarasota, FL  
John Leo Olsen, M.D., Sheboygan, WI  
Juan Diego Oms, M.D., Miami, FL  
Kerry Elizabeth Opdyke, M.D., Portland, OR  
Geoffrey Joseph Oravec, M.D., Washington, DC  
Yana Oskin, M.D., Chicago, IL  
Latha Prabhakar Pai, M.D., Reno, NV  
Caroline Nicole Palmer, M.D., Milwaukee, WI  
Yogesh Chand Pareek, M.D., Appleton, WI  
Eun Kyung Park, M.D., Salem, OR  
Shriti B Patel, M.D., Norfolk, VA  
Caroline Campbell Paterno, M.D., San Diego, CA  
David Eugene Penner, M.D., Belmont, MA  
Melissa K. Pennington, D.O., Southlake, TX  
Gonzalo Perez-Garcia, M.D., Dallas, TX  
Lyndal Christine Petit, M.D., Ottawa, ON  
James Arash Peykanu, M.D., Tualatin, OR  
Laron Edward Phillips, M.D., Chicago, IL  
Lally Pia, M.D., Davis, CA  
Arwen Podesta, M.D., New Orleans, LA  
Todd Kent Pogue, D.O., Bettendorf, IA  
Courtney Anne Prince, M.D., Saint Paul, MN  
Huma Tabassum Qureshi, M.D., San Jose, CA  
Selma Raheem, M.D., Pearland, TX  
Syed Abdur Rahim, M.D., Chicago, IL  
Nabeela Mahmood Rahman, M.D., San Mateo, CA  
Rekha Ramanuja, M.D., Olivette, MO  
Alma Ramic, M.D., Chicago, IL  
Rajdeep Vijay Ranade, M.D., Sacramento, CA  
Rajeevan Rasasingham, M.D., Mississauga, ON  
Anna M. de Haas Ratzliff, M.D. Ph.D, Seattle, WA  
Rachad Rayess, M.D., Anchorage, AK  
Claudia Louise Reardon, M.D., Madison, WI  
Omar Ahmed Reda, M.D., Tigard, OR  
Elise Ernestine Rehn, M.D., Chicago, IL  
James McPherson Reichmuth, M.D., San Francisco, CA  
Shauna Sexton Reid, M.D., Allen, TX  
Allison Sara Remmers, M.D., Seattle, WA  
Vania Odele Revell, D.O., Muskogee, OK  
Loretta Faye Riley, M.D., Denver, CO  
Rabab Rizvi, M.D., Houston, TX  
Catherine Emery Roberts, M.D., New Haven, CT  
Shannon Liane Robinson, M.D., Portland, OR  
Sandra Luisette Rodriguez Davila, M.D., Temple Terrace, FL  
Michael David Hume Rollin, M.D., Denver, CO  
Elena Jovita Rosas, M.D., West St Paul, MN  
Kathy Jean Russeth, M.D., Milwaukee, WI  
Mercy Rathini Sabapathypillai, M.D., Cape Girardeau, MO  
Hala Saleem, M.D., Tracy, CA  
Heideh Sarfehjo, D.O., Saint Anthony, MN  
Heather L. Sauer, M.D., La Marque, TX  
Carol Diane Sexton, M.D., Spokane, WA  
Nicholas Joseph Shea, M.D., Chicago, IL  
Sid Hossein Siahpush, M.D., Madison, WI  
Sorina Simion-Rodgers, M.D., Highlands Ranch, CO

Kevin James Simmons, M.D., Missouri City, TX  
Paul Bonnette Simon, D.O., Saint Peters, MO  
Baljit Singh, M.D., Peoria, IL  
Fiza Singh, M.D., San Diego, CA  
Simrita Singh, M.D., Walnut Creek, CA  
Amer Smajkic, M.D., Chicago, IL  
Abby Mikale Snavely, M.D., Denver, CO  
Shannon Lynne Sniff, M.D., Houston, TX  
Joshua James Sonkiss, M.D., Fairbanks, AK  
Wai Meng Soo, M.D., Minneapolis, MN  
Andrea Elise Sorensen, M.D., Reno, NV  
Shane Edward Sparks, M.D., Little Rock, AR  
Kristin Chase Miller Spoon, M.D., Rochester, MN  
Patrick John Stangeby, M.D., Poplar Bluff, MO  
Bernadette Mietus Stevenson, M.D., Ph.D, Norridge, IL  
Joel Johnson Stoddard, M.D., Bethesda, MD  
Nicole Stromberg, M.D., Ferndale, MI  
Carlos Manuel Suarez, M.D., Medford, MA  
Sara Hamilton Sullivan, M.D., Cambridge, MA  
Uma Suryadevara, M.D., Gainesville, FL  
Eric Carl Swensen, M.D., Fargo, ND  
Katherine Ann Tacker, M.D., Portland, OR  
Rabindra Ratnavale Tambyraja, M.D., Minneapolis, MN  
Raymund Rabara Tan, M.D., Springfield, MO  
Prasanti Tatini, M.D., Tallahassee, FL  
Ravi Kumar Telakapalli, M.D., Alpharetta, GA  
Thanh Son Thai, M.D., Chicago, IL  
Anita Thampy, M.D., Plymouth, MN  
Tanya Yvonne Theriault, D.O., Pensacola, FL  
Melanie Ruth Thomas, M.D., El Cerrito, CA  
Benjamin Albert Thompson, M.D., Kailua, HI  
Emily Frances Tinsley, M.D., San Francisco, CA  
Brian Garson Tobin, M.D., North Haven, CT  
Phyllis Emily Toch, M.D., M.S., Berkeley, CA  
Lamya Touma, M.D., Seaford, NY  
Jacob Benjamin Towery, M.D., Palo Alto, CA  
Kiet Tuan Vinh Truong, M.D., Sacramento, CA  
Jeanie Tin-Yen Tse, M.D., New York, NY  
Kimberly Jing-Yei Lee Tseng, M.D., San Francisco, CA  
In-Lin Tuan, M.D., St Louis Park, MN  
Grazyna Tycner, M.D., Pueblo West, CO  
Chris Allen Unterseher, M.D., Ord, NE  
Mary Richel Unzueta-Hernandez, M.D., San Antonio, TX  
Gayatri Vaidyanathan, M.D., West Allis, WI  
Paul Raymund Valbuena, M.D., Phoenix, AZ  
Melissa Evans Vallas, M.D., Dublin, CA  
Pankhuree Vandana, M.D., Brown Deer, WI  
Robert James Vickrey, M.D., Madison, WI  
Anita Vijayakumar, M.D., Mequon, WI  
Veda Ramarao Vyas, M.D., Maitland, FL  
Christopher Stewart Wadsworth, M.D., San Francisco, CA  
Ken Sandor Wang, M.D., Ph.D, Tacoma, WA  
Michele Wang, M.D., Malibu, CA  
Lauren Jody Waxman, M.D., Valencia, CA  
Mary Anne Weathers, M.D., Brooklyn, NY  
Jonathan Weiss, M.D., Brooklyn, NY  
Keely Wyn Wheeler, D.O., Metairie, LA  
Lisa Ann Wheeler, M.D., Rhinelander, WI  
Matthew P White, M.D., Berkeley, CA  
Michael David Wilcox, M.D., Mt Pleasant, SC  
Rachel Ann Wilkenson, M.D., Scottsbluff, NE  
Theresa Howell Williams, M.D., San Antonio, TX



Emily Jane Wingfield, M.D., Seattle, WA  
Aliza Pham Wingo, M.D., Atlanta, GA  
Dirk Christopher Winter, M.D., New York, NY  
Lora Hilary Wolk, M.D., Haverstraw, NY  
Meredith Jeanne Wong, M.D., New York, NY  
Narin Wongngamnit, M.D., Highlands Ranch, CO  
Eve Allison Wood, M.D., Boulder, CO  
Shaw Wendi Woods, M.D., Chicago, IL  
Jena Sachie Worley, M.D., Yakima, WA  
Shiming Wu, M.D., Brooklyn, NY  
Xiaping Xie, M.D., Salinas, CA  
Daniel A Yahya, M.D., San Francisco, CA  
Eric Yarbrough, M.D., New York, NY  
Sachiko Jean Yari-Doty, M.D., Seattle, WA  
Jennifer Louise Yen, M.D., Houston, TX  
Wendy E Yim, M.D., Northbrook, IL  
Tracey S Yost, M.D., San Antonio, TX  
Kari Elizabeth Youman, M.D., Jenks, OK  
Anna Yusim, M.D., New York, NY  
Ubaid Zafar, M.D., North Salt Lake, UT  
Afraz Uz Zaman, M.D., Kalkie, QLD  
Doreen Zarfati, M.D., New York, NY  
Saul Benjamin Zelan, M.D., San Francisco, CA  
Milos Zivkovic, M.D., Minneapolis, MN  
Lei Zou, M.D., New Haven, CT  
Denise Stella Zusman, M.D., San Francisco, CA  
Deborah Sue Finklestein, M.D., Rancho Palos Verdes, CA  
Sofia Firoz, M.D., Upland, CA  
Karen Christine Floyd, D.O., Tucson, AZ  
Ryan Karl Carandang Fontanilla, M.D., Rock Springs, WY  
Dina Frid, M.D., Foster City, CA  
Srivalli Ganne, M.D., Ridgeland, MS  
Peter L Garcia, M.D., Santa Maria, CA  
Michelle Gavin, M.D., Glenview, IL  
Julie Ann Gedden, M.D., Los Angeles, CA  
David Savinien Gellman, M.D., Los Angeles, CA  
Hebert Georges, M.D., Randolph, MA  
Christina Jara Gesmundo, M.D., Saint Louis, MO  
Elizabeth Carolyn Gilday, M.D., Cincinnati, OH  
Kristine Munoz Glass, M.D., Yucca Valley, CA  
Eric John Goepfert, M.D., Dorchester, MA  
Michelle Dana Goldsmith, M.D., San Jose, CA  
Sylvia Gonzalez, M.D., Houston, TX  
Arun Kumar Gopal, M.D., Elverson, PA  
Mia Dara Gore, M.D., Belmont, MA  
Ravinder Goswami, M.D., Saint Louis, MO  
Yan Grafman, M.D., Clovis, CA  
Jennifer Greenwold, M.D., Newton, MA  
David John Grelotti, M.D., Preston, CT  
Jantje Matthew Groot, M.D., Ventura, CA  
Anne Fanch Gross, M.D., Cambridge, MA  
Kevin Meis Guber, M.D., Chino Hills, CA  
Amit Kumar Gupta, M.D., Aiea, HI  
Renu Gupta, M.D., Brookline, MA  
Jee Hyun Guss, M.D., Concord, CA  
Andrew Todd Haber, M.D., Scottsdale, AZ  
Sandra Sunny Hah, M.D., Orange, CA  
Joshua M Hain, M.D., Teaneck, NJ  
Merita Halilhodzic, M.D., Santa Monica, CA  
Celine Alyssa Hamilton, M.D., Leeds, n/a  
Jeremy Armien Handy, M.D., Grand Forks, ND  
Brandi Allison Hankins, M.D., Little Rock, AR

Dana Lynn Harris, M.D., Pacific Palisades, CA  
Justin Hauxwell, M.D., Golden, CO  
Davinder James Singh Hayreh, M.D., Saint Louis, MO  
Jennifer Rene Hersch, D.O., Long Beach, CA  
Bipinchandra Hirisave Krishna, M.D., North Mankato, MN  
Rachel Anya Hnatowich, M.D., Roxbury Crossing, MA  
Thomas Eugene Hoffman, M.D., Vacaville, CA  
Silvina Soledad Holasek, M.D., Ukiah, CA  
Douglas Brian Holl, M.D., Fontana, CA  
Andrew Clarke Horrigan, M.D., Lancaster, MA  
Mark Austin Howard, M.D., Boston, MA  
Omar Hashim Howard, M.D., Panama City Beach, FL  
Rex Wu Huang, M.D., Los Altos, CA  
Christina Mowkay Hui, M.D., Los Angeles, CA  
Sindhu Idicula, M.D., Houston, TX  
Jolomi Tubogbanimi Ikomi, M.D., Stamford, CT  
Shaily Jain, M.D., Las Vegas, NV  
Jevon J Johnson, M.D., Elk Grove, CA  
Shamalon Rondell Johnson, M.D., New Orleans, LA  
Cholet Kelly Josue, M.D., Towson, MD  
Mona Karimpour, D.O., Corona Del Mar, CA  
Anita Karnik, M.D., Cincinnati, OH  
Andrew Russell Kaufman, M.D., Fayetteville, NY  
Joseph Wiley Keene, M.D., Los Angeles, CA  
Joseph Christopher Kennedy, M.D., Tulsa, OK  
Joy Deann Kennedy, M.D., La Jolla, CA  
My Tang Kha, M.D., Orange, CA  
Nitin Arun Khadilkar, M.D., M.P.H., Yorktown, IN  
Imran Aziz Khan, M.D., Redding, CA  
Shaista Younus Khan, M.D., Sunnyvale, CA  
Tatyana Kharit, M.D., Los Angeles, CA  
Lara Maria Kierlin, M.D., Portland, OR  
Linda Uin Soo Kim, M.D., West Covina, CA  
Michael David Kisicki, M.D., Seattle, WA  
Steve Hyun Koh, M.D., San Diego, CA  
Hristina Kirilova Koleva, M.D., Iowa City, IA  
Philantha Sue-Hwa Kon, M.D., Ph.D., Los Angeles, CA  
Larisa Kononova, M.D., Kansas City, MO  
Michael Kornberg, M.D., La Jolla, CA  
Margarita Krasnova, M.D., Rancho Palos Verdes, CA  
Nishant Kumar, D.O., Newport Beach, CA  
Shimul Ashok Kumbhani, M.D., Berkeley, CA  
Azad Paul Kurkjian, M.D., Los Angeles, CA  
Karla Teresa Lacayo, M.D., Carmichael, CA  
Michele Clarke LaRoe, M.D., San Antonio, TX  
Edward Lau, M.D., San Diego, CA  
Nicole Terese Lavelle, M.D., San Diego, CA  
Jeffrey Lawler, D.O., Claremont, CA  
Esther Seungeh Lee, M.D., Clayton, MO  
J. Elsa Lee, M.D., M.P.H., Newport Beach, CA  
Timothy Tien-Min Lee, M.D., Loma Linda, CA  
Melissa Jackson Lesca, M.D., Lutz, FL  
Dana Kathryn Levy, M.D., Encino, CA  
Richard M Lewis, M.D., Austin, TX  
Annie Sze Yan Li, M.D., Brooklyn, NY  
Jane Li, M.D., Redlands, CA  
Alexis Adams Link, M.D., Los Angeles, CA  
Lin Lu, M.D., Buffalo Grove, IL  
Jeanne Elena Maglione, M.D., Ph.D., San Diego, CA  
Rhanda Marie Mendoza Magsalin, M.D., Wichita, KS  
Lisamar Maldonado-Hernandez, M.D., Houston, TX  
Vikas Malik, M.D., Hartford, CT

Carla Farah Mandili, M.D., Torrance, CA  
Shaheen Mansoor, M.D., Saint Louis, MO  
Katherine Brooke Martin, M.D., Jamaica Plain, MA  
Jeremy David Martinez, M.D., Los Angeles, CA  
Diego Luis Martinucci Canto, M.D., Chestnut Hill, MA  
Gary Maslow, M.D., Durham, NC  
Elizabeth Ruel Matern, M.D., Avon, CT  
Beatriz Amparo Mateus, M.D., Mesa, AZ  
James Bradley McConville, M.D., New Orleans, LA  
Gregory Gene McGowan, M.D., Fontana, CA  
Robert James McHale, M.D., Albemarle, NC  
Josephine King McNary, M.D., Los Angeles, CA  
Clifford Allen McNaughton, M.D., Wickenburg, AZ  
Jennifer Kathleen McWilliams, M.D., Coralville, IA  
Sunil Mehta, M.D., Ph.D., Los Angeles, CA  
Tina Rae Melendrez-Chu, M.D., Honolulu, HI  
Kanthi Menon, M.D., Sewickley, PA  
David Arthur Merrill, M.D., Ph.D., Los Angeles, CA  
Susan Hyun Ju Tomihama Mikami, M.D., Honolulu, HI  
Dilyana Nencheva Milev, M.D., Tupelo, MS  
Margaret Leftwich Miller, M.D., Pleasant Hill, CA  
Sean Augustine Minjares, M.D., Long Beach, CA  
Arif Khalil Mirza, M.D., Marion, AR  
Shalini Mishra, M.D., Kaneohe, HI  
Scott Christopher Morris, M.D., Jamaica Plain, MA  
Gina Rose Mosich, M.D., San Juan Capistrano, CA  
Philip Joseph Muller, D.O., Sioux City, IA  
Muhammad Irfan Munawar, M.D., Ellington, CT  
Kathryn Richell Murray, M.D., Los Angeles, CA  
Yaser Mushtaq, M.D., Avon, CT  
Jeffrey Nachbar, M.D., Northfield, CT  
Celeste Natalie Nadal, M.D., Boston, MA  
Navin Arun Natarajan, M.D., Hutchinson, MN  
Melissa Louise Nau, M.D., San Francisco, CA  
James Allen Nelson, M.D., Houston, TX  
Carolyn Nguyen, M.D., Huntington Beach, CA  
Paul Elliott Nicholas, M.D., Sonoma, CA  
Eric Ward Nolan, M.D., Elgin, IL  
Olga Novik, M.D., Medford, MA  
Erika Lynn Nurmi, M.D., Ph.D., Los Angeles, CA  
Christine Akemi Obata, M.D., Fresno, CA  
Kristen Colleen Ochoa, M.D., M.P.H., Alhambra, CA  
Kehinde Abiola Ogundipe, M.D., New Haven, CT  
Scott Steven Orth, D.O., Alva, FL  
Monica Ikuko Oshita, M.D., Apo, AE  
Ariel David Otero, M.D., Somerville, MA  
Jeremy Wayne Owens, M.D., Ocean Springs, MS  
Christopher Martinez Palacios, M.D., Marblehead, MA  
Eliza Myung Park, M.D., Chapel Hill, NC  
Nishant Rajesh Patel, M.D., Bellevue, WA  
Pranav Patel, M.D., Orange, CA  
Shailesh Manubhai Patel, M.D., Atlanta, GA  
Nicholas Stadis Patniyot, M.D., Houston, TX  
Richard Todd Peterson, M.D., Edina, MN  
Margot Albeck Phillips, M.D., Boston, MA  
Edward Warren Pirok, M.D. Ph.D., Winnetka, IL  
Julie Ross Pittman, M.D. Ph.D, Dallas, TX  
Joseph Edward Podolski, D.O., Waukesha, WI  
Lilit Pogosian, M.D., Glendale, CA  
Laura Catherine Politte, M.D., Arlington, MA  
Maya Gopika Prabhu, M.D., Milford, CT  
Amit Prakash Pradhan, M.D., Salisbury, MD

Serena Puga, M.D., Los Angeles, CA  
Troy Theodore Pulas, M.D., Brookline, MA  
Toni Lynn Pusateri, M.D., Seal Beach, CA  
Brian David Quint, M.D., Malden, MA  
Osman Qureshi, M.D., East Hartford, CT  
Rogerio Miranda Ramos, M.D., Mason City, IA  
Sanjay Sarikonda Rao, M.D., San Diego, CA  
Anita Dawn Red, M.D., Los Angeles, CA  
Christina Lee Rim, M.D., Long Beach, CA  
Rachel Rittman, M.D., Los Angeles, CA  
Thomas Rittman, M.D., Los Angeles, CA  
Kathleen R Rivera, M.D., Danbury, CT  
David Robert Ruecker, M.D., Encinitas, CA  
Stoyan Dimov Rusev, M.D., Highland, CA  
Amanda Meltzer Rush, M.D., Pittsburgh, PA  
Rachel Andrea Russo, M.D., Dallas, TX  
Victor Lincoln Ruterbusch, M.D., Kailua, HI  
Julie Mary Sadhu, M.D., Frankfort, IL  
Payam M. Sadr, M.D., Scottsdale, AZ  
Amber Lea Rohner Sakuda, M.D., Kahului, HI  
Amam Zafar Saleh, M.D., Tulsa, OK  
Jaroslava Salman, M.D., Los Angeles, CA  
Hossein Samadi, M.D., Los Angeles, CA  
Graham Coleman Scanlon, M.D., Palo Alto, CA  
Megan Beth Schabbing, M.D., Dublin, OH  
Elizabeth Merritt Schader, M.D., Mountain View, CA  
Ronald Barry Schneider, M.D., Shreveport, LA  
Randal Scott Scholma, M.D., Saint Louis, MO  
Marisol Aimee Segundo, M.D., Cambridge, MA  
Marvin David Seppala, M.D., Center City, MN  
Aparna Sharma, M.D., Naperville, IL  
Bryan Christian Shelby, M.D., New York, NY  
Raymone Kamel Shenouda, M.D., Hamden, CT  
Joseph Jerome Sheridan, M.D., La Mesa, CA  
Hoonhee Shin, M.D., Flushing, NY  
I-Wei Shu, M.D., Ph.D., San Diego, CA  
Denis Shub, M.D., Phoenix, AZ  
Samina Siddiqui, M.D., Sugar Land, TX  
Benjamin Charles Silverman, M.D., Lexington, MA  
Evan Christopher Silvi, M.D., Rockford, IL  
Arthur Simen, M.D., Ph.D., Orange, CT  
Lucila Sloninsky, M.D., Los Angeles, CA  
Joseph Theodore Smith, M.D., New Haven, CT  
Rachel Jean Sowards, M.D., Nitro, WV  
Brooke Hansen Spanos, M.D., Los Angeles, CA  
Serena Roxane Srikureja, M.D., Tustin, CA  
Daniel Franklin Steigerwalt, M.D., Nolanville, TX  
Emily Fanya Stein, M.D., Los Angeles, CA  
Matthew Joseph Steiner, M.D., Atascadero, CA  
Karis Antonia Stenback, M.D., Apo, AE  
Camille Anita Stephenson, M.D., Akron, OH  
Catherine Marical Stinnett, M.D., Yorba Linda, CA  
Roderick Raymond Stuart, M.D., San Bernardino, CA  
Melissa Nicole Sullivan, M.D., Los Angeles, CA  
Charles William Surber, M.D., Malden, MA  
Rika Suzuki, M.D., Honolulu, HI  
Daniela Magda Tabacaru, M.D., San Diego, CA  
Claudia Adriana Taccir-Macias, M.D., El Paso, TX  
Laine Elizabeth Taylor, D.O., Sunny Isles Beach, FL  
Scott Seijiro Teraoka, M.D., Aiea, HI  
Smita Hiten Thakkar, M.D., Belmont, CA  
Jennifer Anitra Thomas, M.D., M.P.H., Chesapeake, VA

Tavi Thongdy, M.D., Las Vegas, NV  
Anu Radha Thumuluri, M.D., Carmel, IN  
Garrick Gar Tong, M.D., Los Angeles, CA  
Michael Long Trieu, M.D., Boston, MA  
Atur Vikram Turakhia, M.D., Rancho Santa Margarita, CA  
John Robinson Turpin, M.D., West Monroe, LA  
Azeza Bano Uddin, M.D., Philadelphia, PA  
Satish Chandra Vallabhaneni, M.D., Waltham, MA  
Carlos Benjamin Vargas, M.D., Austin, TX  
Victor Johnson Vautrot, M.D., Alexandria, LA  
David Cuauhtemoc Villasenor, M.D., Arcata, CA  
Mark Joseph Viron, M.D., Arlington, MA  
Elizabeth Rose Visceglia, M.D., Brooklyn, NY  
John Hobart Wagner III, M.D., Shreveport, LA  
Syed Waliuddin, M.D., Lombard, IL  
Ava Bernadette Walton, M.D., Mililani, HI  
Kerry Ellen Wangen, M.D., Ph.D., Long Beach, CA  
William Avery Warnes, M.D., Shawnee, KS  
Brian Michael Waters, M.D., San Antonio, TX  
Wendy Joy Watson, M.D., Phoenix, AZ  
David Frederick Widitz, M.D., Iowa City, IA  
Ilse Ruth Wiechers, M.D., M.P.P., Hamden, CT  
Cynthia N Wilson, M.D., Manassas, VA  
David Ford Wilson, D.O., Morgan, UT  
Donovan Alan Wong, M.D., New York, NY  
Felicia Kuo Wong, M.D., Santa Monica, CA  
Rodney Kenji Yamaki, M.D., Aiea, HI  
Joseph Yeretsian, M.D., Boston, MA  
Katherine Marie Young, M.D., Needham, MA  
Genevieve Su-Nin Yu, M.D., Irvine, CA  
Haifeng Yu, M.D., Elk Grove, CA  
Xiaoling Zhu, M.D., Santa Clara, CA

*The following successfully completed the board examination in June 2011.*

---

## **Forensic Psychiatry**

---

Jerrold Andrew Adkins, D.O., El Paso, TX  
Monica M. Argumedo, M.D., Park Ridge, IL  
Joseph H. Baskin, M.D., Beachwood, OH  
Craig Aaron Beach, M.D., Midland, ON  
Timothy L Beal, M.D., London, ON  
Corey Allen Beck, M.D., Atlanta, GA  
Smitha Bhandari, M.D., Atlanta, GA  
Karla Aurora Blackwood, M.D., Ann Arbor, MI  
Richard Charles Blanks, M.D., Washington, DC  
Jonathan Alexander Michael Boyer, M.D., Denver, CO  
Todd Broder, M.D., Saint Augustine, FL  
Joseph Dale Browning, M.D., Atlanta, GA  
John Jason Buckland, D.O., Elgin, SC  
Paul Robert Sullivan Burton, M.D., San Francisco, CA  
Jamae Cherie Campbell, M.D., Columbia, SC  
Rodney P Canete, M.D., New York, NY  
Annemarie Casesa, M.D., New Orleans, LA  
Rupali Chadha, M.D., Los Angeles, CA  
Jennifer Ann Chaffin, M.D., Danville, CA  
Sushila Chelliah, M.D., Washington, DC  
LaRissa Marie Chism, M.D., South Bend, IN  
Susanne Choby, M.D., Morgantown, WV

LaTricia Coffey, M.D., Las Vegas, NV  
Brian Kenneth Cooke, M.D., Gainesville, FL  
Alfonso Corona, M.D., Syracuse, NY  
Edmi Yadelis Cortes Torres, M.D., Miramar, FL  
Abigail L Dahan, M.D., New York, NY  
Christopher Thomas Daley, M.D., San Francisco, CA  
Gregory Lee Davis, M.D., New York, NY  
Alison Patricia Deem, M.D., Buffalo, NY  
Daniel Woods Dick, M.D., Portland, OR  
Brett Michael DiGiovanna, M.D., Hershey, PA  
Erika Patrice Dudley, M.D., Sunrise, FL  
Ryan Felipe Estevez, M.D., Ph.D., M.P.H., Tampa, FL  
Elizabeth Anne Feingold, M.D., New York, NY  
Jessica Ann Ferranti, M.D., El Cerrito, CA  
Bradley William Freeman, M.D., Brentwood, TN  
Nancy Suzanne Fuller, M.D., Middleton, WI  
Keelin Ann Garvey, M.D., Tiverton, RI  
Gianina Gomez, M.D., San Antonio, TX  
Michael Benjamin Greenspan, M.D., Larchmont, NY  
David Vincent Hamilton, M.D., M.A., Chicago, IL  
Shamael Haque, D.O., Canton, MI  
Paul Raymond Hebig, M.D., Vero Beach, FL  
Jeremy Alan Hinton, M.D., Little Rock, AR  
Timothy Marshall Houchin, M.D., Lexington, KY  
Erick Kwan Jo Hung, M.D., San Francisco, CA  
Katherine Yu Chieh Jou, M.D., Baltimore, MD  
Aimee Chappell Kaempf, M.D., Tucson, AZ  
Edward Leon Kaftarian, M.D., San Quentin, CA  
Praveen Reddy Kambam, M.D., Los Angeles, CA  
Marissa Hale Kaminsky, M.D., New York, NY  
David E. Kang, M.D., Jamesville, NY  
Murray Lee Kapell, M.D., Madison, WI  
Reena Kapoor, M.D., New Haven, CT  
Mohammad Asim Khan, M.D., New York, NY  
Carolina Angelica Klein, M.D., Alexandria, VA  
Deborah L Knudson Gonzalez, M.D., Boston, MA  
Steven Shane Konrad, M.D., Brooklyn, NY  
Adrian Timothy Kress, M.D., Gaithersburg, MD  
Andrew Alan Segovia Kulik, M.D., Chicago, IL  
Stephanie Maya Lopez, M.D., Portland, OR  
Heather Luing, M.D., Citra, FL  
Camilla Louise Lyons, M.D., M.P.H., Stamford, CT  
Meroujan Ardziv Maljian, M.D., Monmouth Junction, NJ  
Chanley Morgan Martin, M.D., J.D., Louisville, KY  
Elaine Marie Martin, M.D., Philadelphia, PA  
Christopher Martin Matkovic, M.D., Tiverton, RI  
Stacy Michelle McBain, M.D., Little Rock, AR  
Everett Ellison McDuffie, M.D., Blountville, TN  
Aaron Gavin Meng, M.D., China, ME  
Soroush Mohandessi, M.D., Portland, OR  
Syed Abid Moosvi, M.D., Taunton, MA  
Andrew Eugene Morson, M.D., New Orleans, LA  
David Lynwood Moulton, M.D., Clarksburg, MD  
Khazi A. Muqet, M.D., Brookfield, WI  
Christopher Lloyd Myers, M.D., Boston, MA  
Nishad J. Nadkarni, M.D., La Grange Park, IL  
Andrew Geoffrey Nanton, M.D., Orlando, FL  
Eric Richard Neal, M.D., Ypsilanti, MI  
Michael Allen Nugent, M.D., Claremore, OK

Jennifer Aiko O'Day, M.D., Long Beach, CA  
Soyna Owley, M.D., Rye, NY  
Thomas Brian Owley, M.D., Napa, CA  
Todd Nicholas Palumbo, M.D., Mason, OH  
Susan Gail Parke, M.D., Hamden, CT  
Johanna Fermina Paulino-Woolridge, D.O., Burtonsville, MD  
Markus Ploesser, M.D., Vancouver, BC  
Edward Poa, M.D., Houston, TX  
Mehdi Mahmood Qalbani, M.D., M.S.P.H., New Orleans, LA  
Brian Patrick Quigley, M.D., Morgantown, WV  
David S. Rad, M.D., Los Angeles, CA  
Heather Knott Regwan, D.O., San Antonio, TX  
Joseph R. Richards, M.D., Cabot, AR  
Loren Roth, M.D., New York, NY  
Jeffrey Christopher Rouse, M.D., New Orleans, LA  
Amanda Boswell Salas, M.D., Beaufort, SC  
William Johnathon Sanders, D.O., Byron Center, MI  
Philip Andrew-Cornell Saragoza, M.D., Ann Arbor, MI  
William Schneider, M.D., Atlanta, GA  
Craig Jerome Schoenecker, M.D., Madison, WI  
Roland Segal, M.D., Scottsdale, AZ  
Simrat Singh Sethi, M.D., Salem, OR  
Samantha A Shlakman, M.D., Vienna, VA  
Ryan Scott Shugarman, M.D., Alexandria, VA  
Douglas Alan Smith, M.D., Philadelphia, PA  
Layla Soliman, M.D., Pittsburgh, PA  
KyleeAnn Sophia Stevens, M.D., Alexandria, VA  
Leanne Michell Stoneking, M.D., Santa Ana, CA  
Tara Renee Straka, M.D., New York, NY  
Bipin Raj Subedi, M.D., Brooklyn, NY  
Felipe Porto De Souza Suplicy, M.D., Flowery Branch, GA  
Jessica Dawn Talley, M.D., York, PA  
Caren Beth Teitelbaum, M.D., New Haven, CT  
Benjamin Todd Thatcher, D.O., Kaysville, UT  
Mathews Thomas, M.D., West Roxbury, MA  
Ashley Allen Thompson, M.D., Milwaukee, WI  
Felix E Torres, M.D., Brooklyn, NY  
Michael Sean Tramell, M.D., Mission Viejo, CA  
Ariel L. Troncoso, M.D., San Jose, CA  
Phani Madhav Tumu, M.D., Santa Monica, CA  
Neelam Varshney, M.D., Miami Beach, FL  
Francisco Velarde, M.D., Los Angeles, CA  
Joseph Daniel Villacis, M.D., Cibolo, TX  
Jill Catherine Volin, M.D., Cary, NC  
Lateefah Kibibi Asybi Watford-Goines, M.D., Lithonia, GA  
Frederick D. Weigel, M.D., Asheville, NC  
David Alden Weis, M.D., Virginia Beach, VA  
Sara Gilmer West, M.D., Cleveland, OH  
Jacob Widroff, M.D., Cinnaminson, NJ  
Anthony John Wolf, M.D., Ypsilanti, MI  
Serena Wong, M.D., New York, NY  
Sarah Lilyanne Xavier, D.O., Lincoln, RI  
Ross Albert Yaple, M.D., Glen Allen, VA  
Michael Hyoun Yoo, M.D., M.P.H., South Pasadena, CA  
Sohrab Zahedi, M.D., Farmington, CT  
Edward Zawadzki, D.O., Jupiter, FL

*The following successfully completed the board examination in September 2011.*

---

## Psychiatry

---

Eugenia Ukamaka Abonyi, M.D., Hummelstown, PA  
John Onehibhagbe Abulu, M.D., Brooklyn, NY  
Danielle Folasayo Adegrooye, M.D., High Point, NC  
Prachi Agarwala, M.D., Minneapolis, MN  
Irfan Ahmed, M.D., South Rockwood, MI  
Masum Ahmed, M.D., Poughkeepsie, NY  
Sarbjot Singh Ajit, M.D., Jamaica, NY  
Kwame S Akowuah, M.D., Brooklyn, NY  
Yazman Ali, M.D., Pittsburgh, PA  
Jennifer Cabuniag Almendrala, M.D., Seven Fields, PA  
Indhira F Almonte, M.D., Bronx, NY  
George Lewis Alvarado, M.D., New York, NY  
Martha Del Rosario Alzamora, M.D., Merrick, NY  
Willy Anand, M.D., Edmonton, AB  
Dmitry Borisovich Aniskin, M.D., New York, NY  
Safeer A. Ansari, D.O., Mount Laurel, NJ  
Laura Naomi Antar, M.D., Ph.D., New City, NY  
Denis Antoine II, M.D., Baltimore, MD  
Habeeb Hussein Arar, M.D., Sylvania, OH  
Sascha Ines Arbouet, M.D., Syracuse, NY  
Marsha Tracyann Austin, M.D., Astoria, NY  
Amanda Beth Bachuss, M.D., Franklin, TN  
Randall Scott Bailey II, M.D., Los Angeles, CA  
Veeresh Bajaj, M.D., Marshfield, WI  
Allison Scott Baker, M.D., New York, NY  
Rahul Bansal, M.D., West Des Moines, IA  
Julie Lynn Bartholomae, D.O., Midland City, AL  
Sharon Michelle Batista, M.D., New York, NY  
Nurun Nessa Begum, M.D. PhD, Dover, DE  
Nebyou Belay, M.D., Providence, RI  
Nikole Sara Benders-Hadi, M.D., White Plains, NY  
Alf Hakan Bergman, M.D., Shaker Heights, OH  
Krishna Kishore Bezwada, M.D., Copiague, NY  
Desiree Theodora Biesheuvel, M.D., Brattleboro, VT  
Caroline Blackman, M.D., New York, NY  
Joshua Blume, M.D., Philadelphia, PA  
Vanessa Toney Bobb, M.D., Ph.D., Brooklyn, NY  
Pamela Bochiechio, M.D., Riverside, RI  
Misty Lynne Borst, M.D., Baltimore, MD  
Marta A. Brana-Berrios, M.D., New York, NY  
Romain Branch, M.D., New York, NY  
Ann Marie Branchaud, M.D., Seattle, WA  
John Joseph Briles Jr., M.D., Grosse Pointe Farms, MI  
Aaron Brodsky, M.D., Albuquerque, NM  
Rajvi Gautam Broker, M.D., New York, NY  
Michelle Elise Brooks, M.D., Nashville, TN  
Dawn Kamilah Brown, M.D., San Antonio, TX  
Mark Andrew Brown, M.D., Portland, OR  
Onaija Tamu Bryant, D.O., Hebron, MD  
Hillarie Rachel Budoff, M.D., New York, NY  
Viet Quoc Bui, M.D., J.D., Playa Del Rey, CA  
Scott Alan Campbell, M.D., Philadelphia, PA  
Michael Thomas Cannon, M.D., Ph.D., Loveland, OH  
Amy Arnold Canuso, D.O., Sneads Ferry, NC  
Rebecca Marie Capasso, M.D., New York, NY  
Victoria Capobianco, D.O., Glen Head, NY



Jason Careri, M.D., Bronx, NY  
Patricia Lynn Carlson, M.D., Towson, MD  
Michelle Renee Carter, M.D., Pikesville, MD  
Shanique Tamara Cartwright, M.D., Hyattsville, MD  
Richard Peter Catanzaro, M.D., New York, NY  
Venkat Pritham Chakkaravarthi, M.D., Huntingdon Valley, PA  
Suruchi Chandra, M.D., Lombard, IL  
Geetha Chandrasekaran, M.D., Mount Pleasant, MI  
Sean Rondon Chappin, M.D., New York, NY  
John Mayaram Chardavoyne, M.D., West Haven, CT  
Lily Constance Chiang, M.D., La Jolla, CA  
Julie Ann Chilton, M.D., New Haven, CT  
Susan Chlebowski, M.D., Rochester, NY  
James Peter Cho, M.D., Loveland, OH  
Babar Murtaza Choudhry, M.D., Orwigsburg, PA  
Crystal Tennille Clark, M.D., Houston, TX  
Brian Keith Clinton, M.D., Ph.D., New York, NY  
Michael Justin Coffey, M.D., Ann Arbor, MI  
Dana Ruth Cohen, M.D., Dix Hills, NY  
Joseph Cohen, M.D., Forest Hills, NY  
Agnes Katherine Costello, M.D., Chicago, IL  
Kj Cottrell, M.D., San Francisco, CA  
Jennifer Marie Coughlin, M.D., Lutherville, MD  
Melissa Catherine Crookshank, M.D., Philadelphia, PA  
Rosemarie Cropper, D.O., Oakland Gardens, NY  
Rahi Reza Daneshvar, M.D., Modesto, CA  
Megan Lynn Dankovich, M.D., Rockville, MD  
Matthew Scott Davis, M.D., South Pasadena, CA  
Victoria Angeles De Filippo, M.D., Virginia Beach, VA  
Elena T. Del Busto, M.D., Philadelphia, PA  
Peter Antony Dell, M.D., New York, NY  
Yuliya Dementyeva, M.D., Mahwah, NJ  
Lex Denysenko, M.D., Philadelphia, PA  
Geetha Dhatreecharan, M.D., Saint Joseph, MI  
Suzanne M Dieter, M.D., Ridgewood, NY  
Leigh Dooley, M.D., Indianapolis, IN  
Amanda Stine Dorn, M.D., Chapel Hill, NC  
Catalina M. Draghici, M.D., Yakima, WA  
Kendall Dupree, M.D., Newark, DE  
Paul Eder, M.D., New York, NY  
Daniel Paul Eisenberg, M.D., Bethesda, MD  
Janine Eisman, M.D., Brooklyn, NY  
Lana Ghandi Elhalabi, M.D., Providence, RI  
Omar Anthony Eslao, M.D., Titusville, PA  
Mildred Therese Palomo Fajardo, M.D., Hollidaysburg, PA  
Erin Marie Fallucca, M.D., Waunakee, WI  
Walid Ibrahim Fawaz, M.B.C.H.B., Glen Allen, VA  
Jared Nathaniel Finkell, M.D., New York, NY  
Kelly Fiore, M.D., Bronx, NY  
Kathryn Scarlett Fleming-Ives, M.D., Rumford, RI  
Gretchen Nicole Foley, M.D., Miamisburg, OH  
Russell Foo, M.D., Philadelphia, PA  
Deirdre Mary Foster, M.D., Baltimore, MD  
Maxwell Takai Frank, M.D., Boston, MA  
Eve Khlyavich Freidl, M.D., Brooklyn, NY  
Julia Renee Frew, M.D., Norwich, VT  
HaeSook Fukuda, M.D., Napa, CA  
Shana Jeanelle Gage, M.D., Upper Marlboro, MD  
Harvanit Kaur Gahunia, M.D., New York, NY

Charles Eugene Gaines, D.O., Jonesborough, TN  
Joanna Marie Galati, M.D., Dover, DE  
Angela Gannon, M.D., Orchard Park, NY  
Mercedes Maria Garcia, M.D., La Habra Heights, CA  
Antonio Santiago Garcia Merino, M.D., Martinsburg, WV  
Suzanne Marianne Garfinkle, M.D., M.Sc., New York, NY  
Sarah Nduta Mbogo Gatumu, M.D., Indiana, PA  
Joanna Sabina Gedzior, M.D., Fresno, CA  
Upendar Gehlot, M.D., Lincoln, NE  
Michael Vincent Genovese, M.D., Garden City, NY  
Galina Jeleva Georgieva, M.D., Harrisburg, PA  
Edith Madeline Gettes, M.D., Chapel Hill, NC  
Alexander Matthew Getz, M.D., Columbia, SC  
Daniel Edward Gih, M.D., Ann Arbor, MI  
Nidhi Goel, MD, New York, NY  
Mazhar H Golewale, M.D., Glendale Heights, IL  
Janna Salant Gordon-Elliott, M.D., New York, NY  
Michael Louis Gorjanc, M.D., Salem, OH  
Cheryl Lynn Graber, M.D., Bedminster, NJ  
Susan Margaret Gray, M.D., Brooklyn, NY  
David Mitchell Grodberg, M.D., New York, NY  
Anna Lou Gross, M.D., New York, NY  
Barbara Lynn Gross, D.O., Pottstown, PA  
Victor George Grosu, M.D., Manalapan, NJ  
Maria Roshini Gunaratnam, M.D., Chicago, IL  
Dragoslav M Gvozdzjan, M.D., Burr Ridge, IL  
Aliya Muhammad Hafeez, M.D., Liverpool, NY  
Erin Kathleen Hall, M.D., Middlebury, VT  
Ashley Ann Harmon, M.D., Rochester, NY  
Emily Nicole Harris, M.D., M.P.H., Pittsburgh, PA  
Syed Farhan Tabraiz Hashmi, M.D., Richland, WA  
Emmeline Hazaray, M.D., Northbrook, IL  
Dwayne R Heitmiller, M.D., East Greenwich, RI  
Farah Rochelle Herbert, M.D., Brooklyn, NY  
Sergio Hernandez, M.D., Buffalo, NY  
Ryan John Herringa, M.D., Ph.D., Madison, WI  
Amjad Hindi, M.D., Brooklyn, NY  
William Lyle Hinds III, M.D., Nashville, TN  
Jennifer Lehua Hip-Flores, M.D., Rockville, MD  
Marla Korlin Hires, M.D., Saline, MI  
Ronen Hizami, M.D., Airmont, NY  
Cassandra Danielle Hobgood, M.D., Springfield, MA  
Jonathan Thomas Horey, M.D., New York, NY  
Wissam Khalil Hoteit, M.D., Sylvania, OH  
Matthew Gordon Hough, D.O., Pfafftown, NC  
Nicole J Hraniotis, M.D., Edison, NJ  
Nolan Philip Hughes, M.D., Pittsburgh, PA  
Alicia Marlene Hurtado, M.D., Bronx, NY  
Julie Nicole Hyman, M.D., West Chester, OH  
Michael John Ignatowski, D.O., Bentleyville, OH  
Chioma Linda Iheagwara, D.O., Philadelphia, PA  
Kyoung Bin Im, M.D., Iowa City, IA  
James William Ingraham, M.D., Riverside, RI  
Bergina Brickhouse Isbell, M.D., Upper Marlboro, MD  
Vadim Izgur, M.D., Dix Hills, NY  
Aron Christopher Janssen, M.D., New York, NY  
Samar Aisha Jasser, M.D., Scottsdale, AZ  
Zeeshan Javid, M.D., Springfield, PA  
Ernest Jermin II, M.D., Hartford, CT

Ashley Brooke Johnson, D.O., Scott Afb, IL  
Kahlil Ali Johnson, M.D., Laurel, MD  
Shaneek Donette Johnson, M.D., Narberth, PA  
Sheetal Rashmikant Joshi, M.D., Painesville, OH  
Varuna Joshi, M.D., Salem, VA  
Rose Jeanette Julius, D.O., MPH, Ardmore, PA  
Sonia Juneja, M.D., Morgantown, WV  
Kathleen Jung, M.D., New York, NY  
Nitin Madhukar Kamble, D.O., Carthage, NY  
Michelle Soe Kanaley, M.D., Brooklyn, NY  
Randy Kaplan, M.D., Mechanicsburg, PA  
Muhannad Kassawat, M.D., Youngstown, OH  
Gabriel Gennady Katz, M.D., New York, NY  
Maor Katz, M.D., Stanford, CA  
Prashant Kaul, M.D., Manlius, NY  
Matthew Thomas Keener, M.D., Pittsburgh, PA  
Gary John Keller, D.O., Cedar Rapids, IA  
William Roger Keller, M.D., Lutherville Timonium, MD  
Janet Christina Kennedy, M.D., Longmeadow, MA  
Laura Keen Kent, M.D., New York, NY  
Anna Jaquay Kerlek, M.D., New York, NY  
Mehtab Ali Khan, M.D., Richmond, IN  
Rezwan U Khan, M.D., Champaign, IL  
Talal Khan, M.D., Ada, MI  
Leena Atul Khanzode, M.D., Sunnyvale, CA  
Yelena Khaysman, M.D., Woodmere, NY  
Gauri Khurana, M.D., Manhasset Hills, NY  
Jieun Kim, M.D., Huntingdon Valley, PA  
Alisha Emmett King, M.D., San Antonio, TX  
Rebecca L King, M.D., Syracuse, NY  
Tanya Flegeance Kirby, M.D., Downingtown, PA  
Daisy Klingman, M.D., New York, NY  
Julie Ann Kmiec, D.O., Pittsburgh, PA  
Jennifer Shirck Knapp, D.O., Granger, IN  
Jennifer Mary Knight, M.D., Whitefish Bay, WI  
Sonya Monique Knight, D.O., Plymouth Meeting, PA  
Clarice Lynn Knipe, M.D., Napoleon, OH  
Vlad Kononchuk, M.D., Westbury, NY  
Maju Koola, M.D., Catonsville, MD  
Judy Kovell, M.D., Fayetteville, NC  
Scott Ira Krakower, D.O., Great Neck, NY  
Daniela Krausz, M.D., Jenkintown, PA  
Michael John Krysko, M.D., Woodmere, NY  
Shubha Kulkarni, M.D., Souderton, PA  
Deepak Kumar, M.D., Coalinga, CA  
Susan Marie Kuschnir, M.D., Cincinnati, OH  
Lilly Sehgal La Porta, M.D., Germantown, MD  
Sarojini Laha, M.D., Jamestown, NY  
Kevin Lam, M.D., Haverstraw, NY  
Eva Yanira Landron, M.D., El Paso, TX  
Marioara Lazar, M.D., Hallandale Beach, FL  
Belinda Koo Leblanc, M.D., Belleville, MI  
Bandy Xenobia Lee, M.D., New Haven, CT  
Leilani Victoria Lee, M.D., Mineola, NY  
Natalie Anne Lester, M.D., Pawtucket, RI  
Roxanne Marie Lewin, M.D., West New York, NJ  
Jeanne Lynne Lewis, M.D., Jonesborough, TN  
Ryan Michael Ley, M.D., Reno, NV  
Sai Li, M.D., Ann Arbor, MI

Adam Ligas, M.D., Pittsburgh, PA  
Zuorong Lin, M.D., Allen, TX  
Maria Danielle Linden, M.D., New York, NY  
Matthew William Lorber, M.D., New York, NY  
Janell Erae Lundgren, M.D., Cincinnati, OH  
Patrick Joseph Macmillan, M.D., Johnson City, TN  
Monica Kaur Mahajan, M.D., Chapel Hill, NC  
Christopher Todd Maley, M.D., Mount Juliet, TN  
Eleni Maloutas, M.D., Astoria, NY  
Jonathan Calimlim Manaoat, M.D., Los Angeles, CA  
Farhana Mansoob, M.D., Jersey City, NJ  
Syed Zia Manzoor, M.D., Mechanicsburg, PA  
Laura Allyson Markley, M.D., Akron, OH  
Anissa Mirza Maroof, M.D., Washington, DC  
Omanamhe Masagbor, M.D., Rockville Centre, NY  
Cristian Mateescu, M.D., Napa, CA  
Santoshkumar S Mathapati, M.D., Danville, PA  
Sunita Ann Mathew, D.O., Westlake, OH  
Jose Luis Matias Del Toro, M.D., New York, NY  
Nicole Ann Mavrides, M.D., Parkland, FL  
Stephanie Renee Mayrant, M.D., Falls Church, VA  
William McAllister, M.D., Commerce Township, MI  
Angela Denine McCarthy, D.O., Philadelphia, PA  
Maria Annette McCarthy, M.D., Ph.D, New York, NY  
Daniel Paul McGonigle, M.D., Long Island City, NY  
Kevin Scott McGuire, M.D., Houlton, ME  
Yvette Drake McLin, M.D., Pearland, TX  
Sarjak S Mehta, M.D., New Hyde Park, NY  
Shivani Upendra Mehta, M.D., El Paso, TX  
Rebecca Lynn Meinke, M.D., Eastampton, NJ  
Imad Mohamad Melhem, M.D., Pittsburgh, PA  
Jason Osei Mensah, D.O., Indianapolis, IN  
Sarah Emily Meyer, M.D., New York, NY  
Pinar Miski, M.D., Elkridge, MD  
Miranda Mohabir, M.D., Manlius, NY  
Anseruddin Mohammed, M.D., Johnstown, PA  
Josephine O'Bemigho Mokonogho, M.B.B.S., Philadelphia, PA  
Jilian Weaver Moneypenny, D.O., Midland, MI  
Derek Skeet Mongold, M.D., Morgantown, WV  
Wendy Nash Moyal, M.D., New York, NY  
Christina Mueller Flaherty, M.D., Ann Arbor, MI  
Indroneil Mukerji, M.D., Jamaica, NY  
Yugandhar Reddy Munnangi, M.D., Lagrangeville, NY  
Sabina Mushtaq, M.D., Bloomfield, NJ  
Jennifer Claire Nagode, M.D., Ph.D., San Diego, CA  
Samad E. Namin, M.D., Rye Brook, NY  
Vernon Ian Nathaniel, M.D., Pittsburgh, PA  
Angela Nduaguba-Ezumba, D.O., Owings Mills, MD  
Geoffrey B. Neimark, M.D., Philadelphia, PA  
Van Hoang Nguyen, M.D., Falls Church, VA  
Marina Nikhinson, M.D., Columbia, MD  
Jessica Elizabeth Nord, M.D., Santa Monica, CA  
Isabel Katarina Norian, M.D., Charlotte, VT  
Barry Evan Norman, M.D., Chicago, IL  
Arlene Esperanza Nunez, M.D., Stillwater, MN  
Andrea Kelly O'Leary, M.D., New Orleans, LA  
Meghan Lee O'Neil, M.D., Ph.D., Seattle, WA  
Hilary Lyons O'Neill, M.D., Philadelphia, PA  
Taiwo Olushola Odedeyi, M.D., Atlanta, GA

Margot Montgomery Odonnell, M.D., Philadelphia, PA  
Ebele C Okpokwasili-Johnson, M.D., M.P.H., Roslindale, MA  
Maria Lurdes Oliveira, M.D., Amherst, NY  
Rasheed Adeyinka Onafuye, M.D., Broken Arrow, OK  
Sunyata Oshodi, D.O., Richmond, KY  
Shelley Oxenhorn, M.D., Philadelphia, PA  
Temitope O Oyegbile, M.D., Rochester, NY  
Sravanthi Pajerla, M.D., Troy, MI  
Nikhil Jayant Palekar, M.D., Brooklyn, NY  
Justin Keith Paltrowitz, M.D., Englewood, NJ  
Estelle Dolores Paris, M.D., East Elmhurst, NY  
Shannon N Parks, D.O., Red Bank, NJ  
Anita Rameshchandra Patel, M.D., Saint Louis, MO  
Andrew Pearson, M.D., New York, NY  
Keith Henry Penska, M.D., Burtonsville, MD  
Julie B Penzner, M.D., New York, NY  
Stephen M Perret, M.D., Baldwin, NY  
Todd Erik Peters, M.D., Brentwood, TN  
Justin Daniel Petri, M.D., Chesapeake, VA  
Mahnaz Pezeshpour, M.D., Irvine, CA  
Julie Ann H Phenco, M.D., Huntington, WV  
Kayla Marie Pope, M.D., Boys Town, NE  
Steven J Poskar, M.D., New York, NY  
Steven Wayne Powell, M.D., Windsor, VT  
Leonie Simone Prince, M.D., Hackensack, NJ  
Matthew Prowler, M.D., Philadelphia, PA  
John Aaron Rabin, M.D., Santa Monica, CA  
Alexander Joseph Radnovich, M.D., Ph.D., Avon, IN  
MD Habibur Rahman, M.D., East Elmhurst, NY  
Paul Gurudath Rao, M.D., New Haven, CT  
Amber Vining Ratchford, M.D., Columbia, SC  
Pandeewari Raveendran, M.D., Sudbury, MA  
Clovis Raymond, M.D., New City, NY  
Bradley Paul Reynolds, M.D., Essex Junction, VT  
Annalease Shavon Anishka Richards, M.D., Providence, RI  
Michael Allen Riddle, M.D., Indianapolis, IN  
Luis Henrique Ripoll, M.D., New York, NY  
Syed Azhar Rizvi, M.D., Jersey City, NJ  
Ara J Robinson, D.O., West Des Moines, IA  
Jennifer Marie Rucci, M.D., Landis, NC  
Susan Elizabeth Rushing, M.D., J.D., Gladwyne, PA  
Robert Koji Russell, D.O., Oakton, VA  
Harkirat Singh Saggi, M.D., Fishers, IN  
John Muir Sallee, M.D., Martin, TN  
Steven Arnold Sandstrom, M.D., Tomah, WI  
Priyankar Sarkar, M.D., Philadelphia, PA  
Theodore Daniel Satterthwaite, M.D., Philadelphia, PA  
Lawrence John Schloss, M.D., Ann Arbor, MI  
Suresh Raj Sedhain, M.D., Indiana, PA  
Harjot Singh Sekhon, M.D., Fair Oaks, CA  
Gail Marion Serruya, M.D., Merion Station, PA  
Nicole E. Shadid, M.D., Denver, CO  
Imran Shafi, M.D., Chino Hills, CA  
Seema Shah, M.D., Media, PA  
Noman Shamim, M.D., Brooklyn, NY  
Tehmina Moiz Sheikh, M.D., Ashburn, VA  
Roopa Kyathanahally Siddabasappa, M.D., Cupertino, CA  
Kanwar Ajit Singh Sidhu, M.D., Charleston, WV  
Rhonda Nicole Sims, M.D., Indianapolis, IN

Gaganvir Singh, M.D., Harrisburg, PA  
David Lawrence Sisemore, D.O., Sacramento, CA  
Dwight Glen Smith, M.D., Plymouth, MA  
Rachael Marie Smith, M.D., Sacramento, CA  
Chutrudee Joy Somberg, M.D., Cranston, RI  
Suzannah Jung-Sook Sorg, M.D., Carmel, IN  
Esra Soydinc, M.D., Irvine, CA  
Tiffany Olivia Sparks, M.D., Charleston, WV  
Adriana Michelle Unger Stacey, M.D., Fayetteville, AR  
Atara Stember Stahl, M.D., New York, NY  
Francesca Staiti, M.D., Baltimore, MD  
Raluca Stefanescu-Sturz, M.D., Philadelphia, PA  
James Clyde Styron IV, M.D., Harrisonburg, VA  
Afshan Sultana, M.D., Maryland Heights, MO  
Kiabe Supuwood, M.D., Southfield, MI  
William Biggins Taft, M.D., Madison, WI  
Nouzha Tazi-Mzaalek, M.D., Gibsonia, PA  
Miriam Tetelbom, M.D., Highlands, NJ  
Delvena Renee Thomas, D.O., Miami, FL  
Tiffany Christine Thomas, M.D., Rootstown, OH  
Alexander William Threlfall, M.D., Healdsburg, CA  
Elizabeth Tien, M.D., New York, NY  
Robert Brent Turnipseed, M.D., Austin, TX  
Leticia Beatriz Ugarte, M.D., Chesterfield, MO  
Emmanuel Aniebonam Ugwuoke, M.D., Bensalem, PA  
Punit Vijaykumar Vaidya, M.D., Westlake, OH  
Arvind Vasudevan, M.D., Concord, NC  
Ajay Kumar Veeragandham, M.D., Lumberton, NC  
Lina Maria Villegas-Pelaez, M.D., Brooklyn, NY  
Michael Jung Washo, M.D., Durham, NC  
Joel Campbell Watts, M.D., Montreal, QC  
Amy Nickole Wehrle, D.O., Saint Albans, WV  
Sonia V. Welch, M.D., Pittsburgh, PA  
Christi Ann Weston, M.D., Ph.D., Bangor, PA  
Dena Lynn Whitesell, M.D., North Yarmouth, ME  
Douglas Alan Whitney, M.D., Glen Mills, PA  
Bryan Martin Wick, M.D., Redlands, CA  
Cameron Daniel Wilcox, M.D., Marquette, MI  
Arnold Archer Williams, M.D., Hopelawn, NJ  
Zoe D. Wilson, M.D., Louisville, KY  
Molly Michelle Wimbiscus, M.D., Cleveland, OH  
Helen Huarca Witte, M.D., Baltimore, MD  
Brian Sze-Lik Wong, M.D., New York, NY  
Wilbert Yeung, M.D., Glen Rock, NJ  
Yilmaz Yildirim, M.D., Greenville, NC  
Kelley Wilson Yokum, M.D., Tampa, FL  
Eric Y Yu, D.O., Brooklyn, NY  
Ethel Zapata-Bluhm, M.D., Sugar Land, TX  
Theodore Rudolf Zarzar, M.D., Chapel Hill, NC  
Shumin Zhang, M.D., Gainesville, FL  
Wanhong Zheng, M.D., Morgantown, WV  
Oluranti Adenike Adepoju, M.D., Quincy, MA  
David Kelly Adkinson, M.D., Colorado Springs, CO  
Tisa Adiya Adkinson, D.O., Hamden, CT  
Gaurava Agarwal, M.D., Chicago, IL  
Neil K Aggarwal, M.D., New York, NY  
Ruchi Aggarwal, M.D., Columbia, MO  
Anmir Laura Agresar-Donate, M.D., Brookline, MA  
Faith Aigukeagbon Aimua, M.D., Jonesborough, TN

Miriam Ajo, M.D., Cape Coral, FL  
Abiola Falilat Alao, M.D., Hempstead, NY  
Shannon Leslie Allen, M.D., Pittsburgh, PA  
Jonathan Michael Amiel, M.D., New York, NY  
Tania Amin, M.D., Columbia, MO  
Amy Kathryn Anderson, M.D., Hastings, NE  
Jeffrey Scott Anderson, M.D., Cedar Hill, TN  
Frank Thomas Angotti III, M.D., Durham, NC  
Sandra Kay Antoniak, M.D., Iowa City, IA  
Sunny Padiath Aslam, M.D., Syracuse, NY  
Rebecca Jacqueline Aspden, M.D., New York, NY  
Mari Elisabeth Asper, M.D., Charleston, SC  
Jay Alan Augsburg, M.D., Seattle, WA  
Julienne Aulwes, M.D., Kapolei, HI  
Aaron Avallone, M.D., Pinehurst, NC  
Dilek Iris Avci, M.D., Somerset, NJ  
Victoria Brooke Ayden, M.D., Saint Louis, MO  
Alvi Azad, D.O., Hamden, CT  
Luis Manuel Baez-Cabrera, M.D., San Antonio, TX  
Nitin Dharma Bagul, M.D., Redding, CA  
Rajan Bahl, M.D., Fullerton, CA  
Laura Ann Bajor, D.O., Jamaica Plain, MA  
Justin Taylor Baker, M.D., Ph.D., Boston, MA  
Bridgette Balasko, M.D., Morgantown, WV  
Phillip Eugene Balfanz, M.D., Irving, TX  
Russell Balmer, M.D., Portsmouth, VA  
Nora Bammidi, M.D., Washington, DC  
Stacy Elizabeth Banks, M.D., Palo Alto, CA  
Subhadeep Barman, M.B.B.S., Waterville, ME  
Natasha Grace Baron, M.D., Leonia, NJ  
Tania Nai Barreras-Cruz, M.D., New Brunswick, NJ  
Daniel Robert Bateman, M.D., Lebanon, NH  
Cesar Benitez, M.D., San Diego, CA  
Kimberly Willis Bennett, M.D., Raleigh, NC  
Jeana Leann Benton, M.D., Omaha, NE  
Katherine Ann Beresford, M.D., Salt Lake City, UT  
Avanti Rani Baruah Bergquist, M.D., Renton, WA  
Amy Rachelle Best, M.D., Nashville, TN  
Durga Prasad Bestha, M.B.B.S., Charlotte, NC  
Jennifer Beyer, M.D., Branford, CT  
John Joseph Beyer, M.D., Owings Mills, MD  
Mohit Bhardwaj, M.D., Barboursville, WV  
Richa Bhatia, M.D., Chevy Chase, MD  
Vaibhav Bhatia, M.D., New York, NY  
Kamal Bijanpour, M.D., Los Angeles, CA  
Jozef Lech Bledowski, M.D., Richmond, VA  
Elizabeth Anne Bochtler, M.D., New York, NY  
Donald David Bohnenkamp, M.D., Saint Louis, MO  
Adriana-Maria Boiangiu, M.D., Tucson, AZ  
Candice Lee Boley, M.D., Seattle, WA  
Laurie Anne Boore, M.D., Livonia, MI  
Andrea Estelle Bowen, M.D., Philadelphia, PA  
Maria Deborah Bradley-Moore, M.D., San Francisco, CA  
Leah Gwendolyn Brar, M.D., Denver, CO  
Kjersti Anne Braunstein, M.D., Seattle, WA  
Deborah Lynn Brewster, M.D., Cleveland Hts, OH  
Teide Brisibe, M.D., Guilford, CT  
Benjamin David Brody, M.D., New York, NY  
Archana Devi Brojmohun, M.D., Cleveland Heights, OH  
Lauren Frances Brown, M.D., Brighton, MI  
Deep Buch, M.D., Oak Brook, IL  
Anne Buchanan, D.O., New York, NY

Edward Taylor Buckingham IV, M.D., North Liberty, IA  
Maureen Alice Burbage, M.D., Clemson, SC  
Adam Joseph Burdick, M.D., Oxnard, CA  
Julie Marie Burke, M.D., Charleston, SC  
Rasheed Aremu Shobowale Busari, M.D., Waco, TX  
Craig Bush, M.D., Waynesville, MO  
Bryant Gaddy Byrne, M.D., Charleston, SC  
Ryan Robert Byrne, M.D., Mount Pleasant, SC  
David Albert Byrnes, M.D., Charlottesville, VA  
Mitchell Cabisudo, M.D., Ossining, NY  
Lisa Marie Calusic, M.D., Arlington, VA  
Mary Elizabeth Camp, M.D., Dallas, TX  
Karla Mae Campanella, M.D., Lancaster, PA  
Danielle Andrea Carlin, M.D., San Francisco, CA  
Jeremy Daniel Carpenter, M.D., Columbus, OH  
Olivia Kristen Carrick, M.D., Brooklyn, NY  
Marissa Micah Caudill, M.D., Ph.D., Los Angeles, CA  
Terra Celeste Caudill, M.D., Hickory, NC  
Mirnova Emmanuelle Ceide, M.D., Brooklyn, NY  
Christopher Michael Celano, M.D., Arlington, MA  
Connie Hayjung Cha, M.D., Jersey City, NJ  
Megha Chadha, M.D., Chicago, IL  
Marianne Elizabeth Chai, M.D., New York, NY  
Aalok Chandora, M.D., Atlanta, GA  
Christine Chang, M.D., Santa Monica, CA  
Denise Chang, M.D., Seattle, WA  
Matthew Chang, M.D., Redondo Beach, CA  
Smit Sureshkumar Chauhan, M.D., New York, NY  
Katherine Chemodurow, M.D., San Bruno, CA  
Erick Cheung, M.D., Los Angeles, CA  
Joseph Chien, D.O., Studio City, CA  
Dara Young Cho, M.D., New York, NY  
Shaylin Pui Yuk Kuupunahale Chock, M.D., Toluca Lake, CA  
Edward Ming-Tai Chong, M.D., Houston, TX  
Amit Chopra, M.B.B.S., Rochester, MN  
Kapil Chopra, M.D., Williamsburg, VA  
Kokil Chopra, M.D., Williamsburg, VA  
Shivani Chopra, M.D., Orange, CA  
Lawrence Choy, M.D., Los Altos, CA  
James A Christensen, M.D., Gulfport, FL  
Timothy Walter Seth Clark, M.D., Medford, MA  
David Micah Cochran, M.D., P.H.D., Marlborough, MA  
Shane Matthew Coleman, M.D., Seattle, WA  
Samuel Collier, M.D., Austin, TX  
Suzanne Collier, M.D., Asheville, NC  
Tara Clarice Collins, M.D., M.P.H., San Francisco, CA  
Tarita Collins, D.O., Roslyn, PA  
Jason Robert Collison, M.D., Cheyenne, WY  
Jana Alexandra Colton, M.D., New York, NY  
Anthony Hugo Conciatori, D.O., Whitestone, NY  
Matthew James Conner, M.D., Durham, NC  
Christopher Anthony Conti, M.D., New York, NY  
Timothy John Cordes, M.D., Ph.D., Madison, WI  
Bruce Cornelius, M.D., Manhattan, KS  
Stephanie Corp, D.O., Torrance, CA  
Robert Osterman Cotes, M.D., Atlanta, GA  
Erin Marianne Crocker, M.D., Iowa City, IA  
Norma Aimee Cruz Luna, M.D., Philadelphia, PA  
Michael James Cunningham, M.D., Westfield, NJ  
Alauna Davis Curry, M.D., Fresno, TX  
Christine E Curry, M.D., Seattle, WA  
Eleanor Clare Curry, M.D., Los Angeles, CA



Mary Lisa Cutler, M.D., Owings Mills, MD  
Jason I Dailey, M.D., Clarksville, TN  
Brian Patrick Daly, M.D., Ann Arbor, MI  
Daliborka Manigoda Danelisen, D.O., Christiansburg, VA  
Emad Habib Daniel, M.D., Mission Viejo, CA  
Arman Danielyan, M.D., Cincinnati, OH  
David Michael Danish, M.D., Philadelphia, PA  
Allison Carrell Dark, M.D., Corvallis, OR  
Dipali Rani Das, M.D., Monmouth Junction, NJ  
Piyush Das, M.B.B.S., Cleveland, OH  
Sarah Jane Cuenca De Asis, M.D., Bergenfield, NJ  
Maria Elizabeth de Brito McGee, M.D., M.S., M.P.H.,  
Washington, DC  
Jacek Debiec, M.D., Ph.D., New York, NY  
Katrina Lust DeBonis, M.D., Pacific Palisades, CA  
Deepmala Deepmala, M.B.B.S., Little Rock, AR  
Johanna Wagner Dekay, M.D., Reno, NV  
Donald Edward Deneke, M.D., Ypsilanti, MI  
Ketan Deoras, M.D., Akron, OH  
Melissa Marie Desa, M.D., Churchville, NY  
Anand Praful Desai, M.D., New York, NY  
Jennifer Chamin Desi, M.D., Silver Spring, MD  
Rasheshkumar Bhailalbhair Dholakia, M.D., M.P.H., Jersey  
City, NJ  
Michael Christopher Dickerson, M.D., Redwood City, CA  
James Arthur Disney, M.D., Wake Forest, NC  
Sasikanth Doddapaneni, M.D., Kailua, HI  
Rebecca Lynn Dolgin, M.D., Centerport, NY  
Diana Domnritei, M.D., Portland, OR  
Jeremy Matthew Doniger, M.D., Boston, MA  
Christin Drake, M.D., Brooklyn, NY  
Niles Harris Drake, M.D., New York, NY  
Maura Dunfey, D.O., Philadelphia, PA  
Rene Marie Duregger, M.D., North Liberty, IA  
Katherine Elizabeth Dutra, M.D., Madison, WI  
Raja Dutta, M.D., Davis, CA  
Joseph Raymond Dwaihy, M.D., San Francisco, CA  
Salvador Echeverria, M.D., Los Angeles, CA  
Chijioke Nnanna Egbujo, MD, MBBS, Philadelphia, PA  
Khalid El-Sayed, M.D., Baltimore, MD  
Rachel Elias, M.D., Cambridge, MA  
Lauren Jill Elliott, M.D., Philadelphia, PA  
Robert William Ellis, M.D., Howell, MI  
Carlos Alberto Enciso Chaves, M.D., Southington, CT  
Maryam Eskandari, M.D., San Francisco, CA  
Jason Edward Estok, M.D., Englewood, NJ  
Kenneth Kehinde Etefia, M.D., Santa Clara, CA  
Arusha Farahani, M.D., Forest Hills, NY  
Muhammad Ishaq Farhan, M.D., Troy, MI  
Reza Farokhpay, M.D., Orange, CA  
Lawrence Faziola, M.D., Orange, CA  
Catherine Anne Fericola, M.D., Richmond, VA  
Melanie Annette Fillmore, M.D., Tucson, AZ  
Rebecca Naomi Fink, M.D., New York, NY  
Kavita Kadiwar Fischer, M.D., Pittsburgh, PA  
Caris Talburt Fitzgerald, M.D., Pittsburgh, PA  
Latoya Anyika Floyd, M.D., Philadelphia, PA  
Brian Christopher Foley, M.D., San Diego, CA  
Anique Kerry-Ann Forrester, M.D., Philadelphia, PA  
Kelly Holliday Foster, M.D., Los Angeles, CA  
James Bernard Fox, M.D., White Stone, VA  
Sophia Andrea Francis-Stewart, M.D., Baldwin, NY

Nicole Yvonne Franklin, M.D., Providence, RI  
Alexis Lee Freedberg, M.D., Cambridge, MA  
Yun Freudenberg-Hua, M.D., Little Neck, NY  
Nora Delia Friedman, M.D., Brookline, MA  
Michelle E Fulk, D.O., Lakewood, OH  
Sonya Emi Gabrielian, M.D., M.P.H., Santa Monica, CA  
Danielle Michelle Gainer, M.D., Spring Valley, OH  
Geeta Devi Ganda, D.O., New York, NY  
Ritu Narang Gandhi, M.D., Middleton, WI  
Samita Gandhi, M.D., Davis, CA  
Sunil Gangwani, M.D., Saint Louis, MO  
Jessica Michelle Gannon, M.D., Pittsburgh, PA  
Mandy Garber, M.D., Pittsburgh, PA  
Sharad Garbharran, M.D., Chicago, IL  
Mauro A Garcia Altieri, M.D., Dorado, PR  
Sandra Gascon-Garcia, M.D., Philadelphia, PA  
Emily Davies Gastelum, M.D., New York, NY  
Emily P Gavett, M.D., Hamilton, NY  
Lee Ann Gee, M.D., Louisville, KY  
Eric M Geigle, M.D., West Hartford, CT  
Elizabeth McIlduff Georges, M.D., Chicago, IL  
Ruth Sarah Gerson, M.D., Brooklyn, NY  
Stephanie Allison Giannandrea, M.D., Seattle, WA  
Tresha Ann Gibbs, M.D., Bronx, NY  
Kathryn Elizabeth Gilligan, M.D., Iowa City, IA  
Mark Magdi Gindi, M.D., Chicago, IL  
Almari Ginory, D.O., Gainesville, FL  
Kathrine Frances Girrens, M.D., Wichita, KS  
Jody Brown Glance, M.D., Carnegie, PA  
Jill Christine Glazewski, M.D., Portland, OR  
Anna Glezer, M.D., San Francisco, CA  
Juliet Aregbesola Glover, M.D., Columbia, SC  
Ellen Gluzman, M.D., Philadelphia, PA  
Mandeep Kaur Gogia, M.D., Philadelphia, PA  
Jeanne S Goodman, M.D., Brooklyn, NY  
Bradley G Goodson, M.D., Nashville, TN  
Ganesh Gopalakrishna, M.D., Columbia, MO  
Priya Gopalan, M.D., Pittsburgh, PA  
Robert Vincent Gouthro, M.D., Hobart, WI  
Ramya Gurumurthy Goyal, M.D., Pittsburgh, PA  
Justin Donald Graham, M.D., Minneapolis, MN  
Paula Irene Graham, M.D., Little Rock, AR  
Ruth Modesta Graupera-Frain, M.D., Evans, GA  
Emily Kathryn Gray, M.D., San Diego, CA  
Lisa Kaplan Gray, M.D., Cincinnati, OH  
Alma Grewal, M.D., Milwaukee, WI  
Heather Marie Grigo, M.D., Pittsburgh, PA  
Michael Brandon Grody, M.D., New York, NY  
Jason Charles Grove, D.O., Roanoke, VA  
David Wayne Guffey, M.D., Lansing, MI  
Allison Evans Gullo, M.D., West Linn, OR  
Martina Roshani Gunaratnam, M.D., Chicago, IL  
Ehsan Habibpour, M.D., Frisco, TX  
Karen Therese Hadley, M.D., Oak Park, IL  
Alan Kyle Hagstrom, M.D., Palo Alto, CA  
Gregory Charles Hahn, D.O., Manhattan, KS  
Aditi Vikas Hajirnis, M.D., Jamaica, NY  
Tariq Halim, M.D., Saint Marys, GA  
Dustin William Hall, M.D., Atlanta, GA  
Jennifer Marie Hall, D.O., Fairfax, VT  
Timothy McCajor Hall, MD, PhD, Los Angeles, CA  
Gareen Hamalian, M.D., New York, NY

Jin Yong Han, M.D., Houston, TX  
Erin Emmanuel Hanover, M.D., Pelham, AL  
Laurie Mitchell Harden, M.D., Tallahassee, FL  
Maria Harmandayan, M.D., Rochester, MN  
Jennifer Lynn Harrington, M.D., Oak Park, MI  
Stephanie Lynn Hartselle, M.D., Providence, RI  
Phillip A.K. Hash, D.O., Ph.D., Lexington, KY  
Alric Hawkins, M.D., Nashville, TN  
Nicole Lauren Herschenhaus, M.D., Cambridge, MA  
Laura Anne Hershberger, M.D., Lloyd Harbor, NY  
Benjamin Robert Hershey, M.D., Carlsbad, CA  
Rebecca Marie Hicks, M.D., New Haven, CT  
Hon Lung Ho, M.D. M.P.H., Baltimore, MD  
Uyen Bao Hoang, M.D., Long Beach, CA  
Sigalit Hoffman, M.D., Jamaica Plain, MA  
Jeffrey Jacob Hollingsworth, D.O., Helotes, TX  
Ben William Holt, M.D., Syracuse, UT  
Jennifer Elizabeth Holton, M.D., Durham, NC  
Matthew David Holve, M.D., Mountain View, CA  
Josephine Pardenilla Horita, D.O., Honolulu, HI  
Amanda Erin Horrigan, M.D., Los Angeles, CA  
John Douglas Hunsaker, M.D., Kailua, HI  
Olivia Thea Hunte, M.D., San Antonio, TX  
Anju Hurria, M.D., San Diego, CA  
Filza Hussain, M.B.B.S., New York, NY  
Jamie Ellis-John Hutchinson, M.D., Belle Chasse, LA  
Soonjo Hwang, M.D., Somerville, MA  
Aerin Hyun, M.D., Ph.D., New York, NY  
Aalamgeer Khakan Ibrahim, M.D., Irving, TX  
Fayaz Ahmed Ibrahim, M.D., Fresno, CA  
Theddeus Iheanacho, M.D., Orange, CT  
Susan Hanae Imamura, M.D., Menlo Park, CA  
Rae Bernadette Insalaco, D.O., Fairview Park, OH  
Kiran Iqbal, M.D., Ellicott City, MD  
Nina Isakovich, M.D., Brighton, MA  
Luis Carlos Isaza, M.D., Tripler Amc, HI  
Muhammad Ishaq, M.D., Norman, OK  
Ashraf Ismail, M.D., Chino Hills, CA  
Mohammed Issa, M.D., Morgantown, WV  
Ana Ivkovic, M.D., Cambridge, MA  
Syed Ali Akbar Jafery, M.D., Brockton, MA  
Kavita Jagarlamudi, M.D., Hoffman Estates, IL  
Joy James, M.D., Ann Arbor, MI  
Angela Christine Janis, M.D., Madison, WI  
Fritz Jean-Noel, M.D., Rochester, MN  
Michelle Jeannette, M.D., Seattle, WA  
Steven Jeffers, M.D., Roseburg, OR  
Colibri Jenkins, M.D., New Orleans, LA  
Roger Gee Joe, M.D., Houston, TX  
Katherine Barbara Johnson, M.D., Durham, NC  
Kenyatta Mie Jones, M.D., Temple, TX  
Kristin Camille Jones, M.D., Atlanta, GA  
Tiffany S Jones, M.D., Cleveland, OH  
Aditya Joshi, M.D., Harrisburg, PA  
Yukyung Jung, M.D., New York, NY  
Nadiya Leonidivna Kaesemeyer, M.D., Chapel Hill, NC  
David Conroy Kaicher, M.D., Philadelphia, PA  
Rishi Kakar, M.D., Plantation, FL  
Devinalini Kamaraj, M.D., Hamden, CT  
Fareesh Hobbs Kanga, M.D., Lexington, KY  
Melissa Harris Kannaday, M.D., Columbia, SC  
Kathryn Kanner, M.D., Phoenix, AZ

Sanjana Tasneem Karim, M.D., Richmond Hill, GA  
Harinder Kaur, M.D., Toledo, OH  
Yukari Kawamoto, M.D., Phoenix, AZ  
Jennifer Kin Kawase, M.D., Visalia, CA  
Joshua Edward Kayman, M.D., Oakland, CA  
Courtney Keckich, M.D., Owings Mills, MD  
Annalise Susan Keen, M.D., Santa Monica, CA  
Corinna Maria Keenmon, M.D., Santa Monica, CA  
John Charles Kelleher III, M.D., Los Angeles, CA  
John Robinson Keltner, M.D., San Diego, CA  
Mustafa Kendi, M.D., Minneapolis, MN  
Daniel Sergio Kestelman, M.D., Rego Park, NY  
Sarah Daniella Kevelson, M.D., Bronx, NY  
Joelle Megan Kezlarian, M.D., Chicago, IL  
Shabana Khan, M.D., Pittsburgh, PA  
Anjum Khatoon, D.O., Morton Grove, IL  
Abdul Mateen Khazi, M.D., Brookfield, WI  
Deepak Khemka, M.D., Ridgeland, MS  
Andrew Hankyung Kim, M.D., Los Angeles, CA  
Andrew Robert Kim, M.D., Jamaica Plain, MA  
Clara Suneun Kim, M.D., Worcester, MA  
Jonathan Kiltai Kim, M.D., El Paso, TX  
Sunny Young Kim, M.D., Nashville, TN  
Yana Chavdarova Kirova-Pancheva, M.D., Lynn Haven, FL  
Kristina Kise, M.D., Gainesville, FL  
Adam Phillip Klapperich, D.O., Minneapolis, MN  
Brian Thomas Kleyensteuber, M.D., Kailua, HI  
Stephanie Rose Knight, M.D., Glen Burnie, MD  
Katherine Hobbs Knutson, M.D., Boston, MA  
Alisha Desai Kohm, M.D., Sherman Oaks, CA  
Bhanuprakash Kolla, M.D., Rochester, MN  
Dara Lynn Kolodner, M.D., New York, NY  
Sang-Wahn Koo, M.D., Olivette, MO  
Zachary Andrew Kordik, M.D., Chicago, IL  
Larisa Kouperschmidt, M.D., Canton, MA  
Mary Ann Koza, D.O., Duryea, PA  
Jennifer Lynn Kraker, M.D., New York, NY  
Aaron Jacob Krasner, M.D., New York, NY  
Trevor Allen Krehbiel, M.D., Wichita, KS  
Suzanne M Krishnamoorthy, D.O., Nesconset, NY  
Tanya Brown Krolls, M.D., Houston, TX  
Madhukar Kumar, M.D., Chicago, IL  
Laura Elaine Kurlyandchik, M.D., Atlanta, GA  
Pawel Krzysztof Kurylo, M.D., Little Rock, AR  
Joe Yosup Kwon, M.D., New York, NY  
Christopher L La Riche, M.D., Bay Harbor Islands, FL  
Pilar Laborde-Lahoz, M.D., Woodbridge, CT  
Dana-Jean S LaHaie, M.D., Mesa, AZ  
Jennifer Ann Lancaster, D.O., Fresno, CA  
Tracy Lee Langford, D.O., Oklahoma City, OK  
Frederick John Paul Langheim, M.D., Ph.D., Madison, WI  
Jillian Ann Lankford, M.D., Holland, MI  
Elissa Maureen Lapide, M.D., Waban, MA  
Theresa Michele Larkin, M.D., Clearwater, FL  
Elizabeth Paige Lassen, D.O., Chicago, IL  
Paulette Denise Lassiter, M.D., Warrensburg, MO  
Adam Lau, M.D., Hastings On Hudson, NY  
Mallika Lavakumar, M.D., New York, NY  
Lu Da Le, D.O., San Diego, CA  
David Mark Leach, M.D., Newtown, PA  
William Brooks Leasure, M.D., Bellevue, NE  
Ruby E-Jean Lee, M.D., Providence, RI

Naomi Earls Leslie, M.D., Redwood City, CA  
Jamey B Levy, M.D., Brooklyn, NY  
Jonathan Lang Levy, M.D., Decatur, GA  
Rebecca Auline Lewis, M.D., New York, NY  
Benjamin Tak-Kay Li, M.D., Houston, TX  
Joanna Elizabeth Lindell, D.O., Chicago, IL  
David Liu, M.D., San Francisco, CA  
Vicente J Liz Defillo, M.D., New York, NY  
Kimberly Chik Lloyd, M.D., Irvine, CA  
Verna Wailan Lo, M.D., San Francisco, CA  
Elizabeth Lobel, M.D., Forest Hills, NY  
Adrienne Lona, M.D., Mountain View, CA  
Yolanda L Loo, M.D., Seattle, WA  
Jeriel Adam Lorca, M.D., Los Angeles, CA  
Annemarie Katherine Loth, M.D., Indianapolis, IN  
Catherine Elizabeth Louis, M.D., Pittsburgh, PA  
Kenneth Joseph MacIntyre, D.O., Denver, CO  
Lisa Leah Madsen, M.D., Austin, TX  
Nickoles Odell Mahaffey, M.D., Loma Linda, CA  
Melissa Dawn Maitland, M.D., Falls Church, VA  
Nikhil Daniel Majumdar, M.D., Redwood City, CA  
Charles Jason Mallo, D.O., Pittsfield, MA  
Jessica Kristin Malloy, M.D., Sandston, VA  
Partam Manalai, M.D., Richmond, VA  
Eleni Maneta, M.D., Boston, MA  
Christopher Thomas Manetta, D.O., Albuquerque, NM  
Devanand Sadanand Manoli, M.D., Ph.D., San Francisco, CA  
Christine Marchionni, M.D., Philadelphia, PA  
Michael James Marcsisin, M.D., Pittsburgh, PA  
Pascale Nicole Mardikian, M.D., Charleston, SC  
Carla Beth Marienfeld, M.D., Hamden, CT  
Stephanie Mulligan Marko, M.D., Durham, NC  
Asa Kai Marokus, M.D., Denver, CO  
Saba Maroof, M.D., Troy, MI  
Natasha Monique Viquez Marrus, M.D., Saint Louis, MO  
Danielle Martin, D.O., Farmingdale, NY  
Peter Scott Martin, M.D., Buffalo, NY  
Samuel Gene Martin, M.D., Broken Arrow, OK  
Veronica Martin Ocasio, M.D., Philadelphia, PA  
Sanjay Stanley Masilamani, M.D., Hurricane, WV  
Ryan Christopher Mast, D.O., Centerville, OH  
Sirosh Masuood, M.D., Forest Hills, NY  
Daniel Cochukattil Mathews, M.D., Washington, DC  
Jordan P Matus, M.D., Bronx, NY  
Donovan T Maust, M.D., Pitman, NJ  
Jeffrey Lee McCann, M.D., North Logan, UT  
Evan Scott McCord, M.D., Greeneville, TN  
Mark Robert McDonald, M.D., Redondo Beach, CA  
Nadia Anne McFarlane, M.D., Philadelphia, PA  
Aleta Marie McGough, M.D., Irmo, SC  
Solomon Daniel Meltzer, M.D., Charlottesville, VA  
Salud Poblete Mendoza, M.D., Binghamton, NY  
Jaya Bindu Merugu, M.D., Hoover, AL  
Jacob Ralph Messing, M.D., New York, NY  
Corey Alexander Meyer, M.D., Somerville, MA  
Weronika Anna Micula-Gondek, M.D., Columbia, MD  
Ashley Kiki Miller, M.D., Landover, MD  
Valerie Anne Miller, M.D., Medford, MA  
William George Miller, D.O., Cincinnati, OH  
Jennifer Melissa Milone, M.D., Houston, TX  
Pamela A Mirsky, M.D., Tucson, AZ  
Kristin Anna Miselis, M.D., Seattle, WA

Graham Thomas Mitchell, M.D., Pasadena, CA  
Fumi Mitsuishi, M.D., M.S., Oakland, CA  
Krzysztof Mlak, M.D., Detroit, MI  
Diana Elena Moga, M.D., New York, NY  
Arash Moghaddam, M.D., Seattle, WA  
Yavar Moghimi, M.D., Washington, DC  
Kelly Katherine McGuire Morton, M.D., New York, NY  
Lindsay Joy Moskowitz, M.D., New York, NY  
Sybil M Mouzon, M.D., Jamaica, NY  
Louise Mullan, M.D., New York, NY  
Patrik Munzar, M.D., Livermore, CA  
Nancy Ann Murphy, D.O., Inola, OK  
Deepa Raju Nadimpalli, M.D., Olmsted Falls, OH  
Nicole Alison Nagggar, M.D., New York, NY  
Michael Jason Ragas Naguit, M.D., Pittsburgh, PA  
Nasir Hasnain Naqvi, M.D., Ph.D., Scarsdale, NY  
Nirupama Arkonam Natarajan, M.D., Roanoke, VA  
Neha Nayyar, M.D., Phoenix, AZ  
Gina G Negrette, M.D., Milwaukee, WI  
Marina Nesterenko, M.D., New Hartford, NY  
Rachel Esther Neuhut, M.D., Miami, FL  
Long Hoang Nguyen, M.D., San Francisco, CA  
Tuan-Anh Thi Nguyen, M.D., San Diego, CA  
Karen Ni, M.D., Seattle, WA  
Adam David Nicholas, M.D., Midland, MI  
Delia Enid Nieves-Arvelo, M.D., San Diego, CA  
Gagan Virk Nijjar, M.D., Novato, CA  
Sarah Cathryne Noble, D.O., Philadelphia, PA  
Nelly Prescilla Norrell, M.D., Crozet, VA  
Emeke Benedict Nwabuzor, M.D., Antioch, TN  
Kate Elizabeth Nyquist, M.D., Cambridge, MA  
Nnamdi Emmanuel Odiah, M.D., Lynbrook, NY  
Aderonke Ayodele Oguntoye, M.D., Washington, DC  
Rashmi Ojha, M.D., Omaha, NE  
Uchenwa Diana Okoli, M.D., Cambridge, MA  
Olumide Oluremi Oluwabusi, M.D., M.R.C.Psych., Jenkintown, PA  
Kristian Rein Olvet, M.D., Floral Park, NY  
Hannah Ong, M.D., Beltsville, MD  
Mabel O Onwuka, M.D., Shoreline, WA  
Monica Ormeno, D.O., Tamuning, GU  
Terry Francis Osborne II, D.O., Worcester, MA  
Carolina Osorio, M.D., Irvine, CA  
Gina Michelle Borugian Ostermann, M.D., Thousand Oaks, CA  
Enrique I. Oviedo, M.D., Baltimore, MD  
Akinkunle Owoso, M.D., Saint Louis, MO  
Urmila Mohan Pai, M.D., Bayside, NY  
Neal Palmreuter, M.D., Oak Harbor, WA  
Richard Stephen Pannel, D.O., Birmingham, AL  
Sarah Katherine Gantz Pannel, D.O., Oxford, MS  
Sunil Dutt Parashar, M.D., Saginaw, MI  
Shrenik Pratapbhai Parekh, M.B.B.S., Portland, OR  
Vinay Kishor Parekh, M.D., Baltimore, MD  
Cristina Park, M.D., Coconut Grove, FL  
Susan Suh-Young Park, M.D., New York, NY  
Rizwan Ahmed Parvez, M.D., New Haven, CT  
Amber Elizabeth Pastusek, M.D., League City, TX  
Kajal Ramesh Patel, M.D., Cherry Hill, NJ  
Rahul Sumantrai Patel, D.O., Bloomington, IL  
Vishal Hasmukh Patel, M.D., New York, NY  
Jocelyn M Pearson, D.O., Kansas City, MO  
Nicholle R Peralta, M.D., Windsor, CO

Kwitka Durana Peratt, M.D., Westminster, CA  
Angel Luis Perez, M.D., Decatur, GA  
Carolyn Michelle Phelps, M.D., Portland, OR  
Richard Cannon Phelps, D.O., Mt Pleasant, SC  
Aisha Phillipson, M.D., Jersey City, NJ  
Jennifer Lynn Piel, M.D., J.D., Cleveland, OH  
Elizabeth Grace Pinsky, M.D., Somerville, MA  
Stacey Raab Pisklak, M.D., Houston, TX  
Aaron John Plattner, M.D., East Grand Rapids, MI  
Martin Henry Plawecki, M.D., Ph.D., Greenwood, IN  
Connie Evelyn Poetter, M.D., Tampa, FL  
Patrick Nicholas Pompl, M.S., M.D., Venice, CA  
Kimberly Marie Ponton, M.D., Los Angeles, CA  
Kimberly Melissa Poole, D.O., Little Rock, AR  
Victoria Celeste Porter, M.D., Baltimore, MD  
Basant Kumar Pradhan, M.D., Philadelphia, PA  
Sandhya Jyoti Prashad, M.D., Houston, TX  
Michelle Marie Primeau, M.D., Foster City, CA  
Xenia Protopopescu, M.D., Ph.D., New York, NY  
Paul Rajesh Puri, M.D., Los Angeles, CA  
Amanda Enid Pusey, M.D., New Haven, CT  
Leon Tan Que Jr., M.D., Louisville, CO  
Michael Quines, M.D., Redlands, CA  
Jennifer Ann Quinn, M.D., Durham, NC  
Zaid Yusufi Rafin, M.D., Chula Vista, CA  
Morteza Rahmani, M.D., Brooklyn, NY  
Ranvinder Rai, M.D., Palo Alto, CA  
Shreya Raj, M.D., Boston, MA  
Anil Kumar Ramachandran, M.D., Libertyville, IL  
Lakshika Munasinghe Ranaweera, M.D., Manhattan, KS  
Jyoti Kaur Randhawa, M.D., Chicago, IL  
Ernest Rasyidi, M.D., Los Angeles, CA  
Amanda Reahard, M.D., Dallas, TX  
Alexis Christina Recine, M.D., Salt Lake City, UT  
Lakshmi Patlolla Reddy, M.D., New York, NY  
Sheela Gudimetla Reddy, M.D., Seattle, WA  
Robin Marie Reed, M.D., Chapel Hill, NC  
Desirae J Reeder, M.D., Houston, TX  
Urrooj Habib Rehman, M.D., Boston, MA  
Jennifer Grossman Reid, M.D., Los Angeles, CA  
Daniel R. Reilly, M.D., Brooklyn, NY  
Sachin Relia, M.D., M.R.C.Psych., Skokie, IL  
Christian Fernando Reusche, M.D., Charleston, SC  
Brandon Reynolds, M.D., Camillus, NY  
Hamed Rezaishiraz, M.D., Modesto, CA  
Jesse Charles Rhoads, D.O., West Plains, MO  
Alisson L Richards, M.D., Jericho, VT  
Jeremy Steven Richards, M.D., Saipan, MP  
Jessica Richter, D.O., New York, NY  
Holly Porter Rigoulot, M.D., Galveston, TX  
Aaron Vincent Riley, M.D., Milwaukee, WI  
Jose Yauzeph Rios Robles, M.D., Guaynabo, PR  
Abishek Raj Rizal, M.D., Dallas, TX  
Jolie Katherine Cullen Roberts, M.D., Houston, TX  
Liban Abdi Rodol, M.D., J.D., Portland, OR  
Marialba Romero Medina, M.D., Philadelphia, PA  
Candace Andrea Romo, M.D., San Antonio, TX  
Andrew Jacob Rosenfeld, M.D., New York, NY  
Cindy Ellzey Rossetti, M.D., Batesville, AR  
Michael Dean Rothenfluch, M.D., Portland, OR  
Melanie Viola Rowson, M.D., Columbia, MD  
Anne Elizabeth Ruble, M.D., M.P.H., Catonsville, MD

Christina B Rumayor, M.D., Pinehurst, NC  
James Knowles Rustad, M.D., Boston, MA  
Mark Rybakov, D.O., Morganville, NJ  
Michael Edward Sabatino, M.D., Johnson City, NY  
Samir Antonio Sabbag Flores, M.D., Miami, FL  
Shilpa Sachdeva, M.B.B.S., Syracuse, NY  
Jillan Cantor Sackett, M.D., Philadelphia, PA  
Pauline Sack Sacks, M.D., Newport Beach, CA  
Afia Sadiq, M.D., New York, NY  
Sina Saidi, M.D., New York, NY  
Abdullah Khalil Sallaj, M.D., Chicago, IL  
Cristina Sanchez-Jaquez, M.D., West Hartford, CT  
Corneliu Sanda, M.D., Forest Hills, NY  
Sabrina S. Sandoval, M.D., Santa Clara, CA  
Elizabeth Gretchen Sarnoski, M.D., Eagle River, AK  
Naomi Ariel Schmelzer, M.D., Brookline, MA  
Elizabeth L Schmitt, M.D., Springboro, OH  
Paul Anthony Schneider, D.O., Colleyville, TX  
Christian Cord Schrader, M.D., Lawton, OK  
Jan Schuetz-Mueller, M.D., New York, NY  
Pavan Nath Segal, M.D., Chicago, IL  
Zoe Selhi, M.D., Roxbury Crossing, MA  
Alin James Severance, M.D., Pittsburgh, PA  
Miriam Maite Sevilla Saez-Benito, M.D., Hoover, AL  
Sejal Bhailal Shah, M.D., Brookline, MA  
Shristi Shah, M.D., Scarsdale, NY  
Abdolazim Shahsavar, M.D., Hamden, CT  
Michael S. Shairs, D.O., Rowley, MA  
Avreliya Shapiro, M.D., Brooklyn, NY  
Billina Rose Shaw, M.D., Baltimore, MD  
Deepti Sheno, M.D., Oak Park, IL  
Robert Mark Shideler, M.D., Prattville, AL  
Ashley Rae Sholes, M.D., Seattle, WA  
Sittanur Shoush, M.D., Chicago, IL  
Santosh Shrestha, M.D., Springfield, IL  
Janet E Shu, M.D., Brighton, MA  
Neeraj Krishna Shukla, M.D., Thorold, ON  
Ali Siavashi, M.D., New York, NY  
Humaira Adeeb Siddiqi, M.D., Centreville, VA  
Kara Amanda Sieverdes, M.D., Columbia, SC  
Ajay Pal Singh, M.D., Toledo, OH  
Lalit Kumar Singh, M.D., Wauwatosa, WI  
Geoffrey Robert Sinner, M.D., Guilford, VT  
Walter Edward Benkert Sipe, M.D., San Francisco, CA  
Bryan Greene Smith, M.D., Winston Salem, NC  
Erica Danette Smith, M.D., Jonesboro, AR  
Stephanie Lynn Smith, M.D., Minneapolis, MN  
Dimple Sodhi, M.B.B.S., Westbury, NY  
Jasdeep Kaur Sohi, M.D., Beachwood, OH  
Martine Marie Solages, M.D., New Haven, CT  
Monissa Joyce Solberg, M.D., Sacramento, CA  
Olaya Lizette Solis, M.D., Ann Arbor, MI  
Priya Sonik, M.D., Sacramento, CA  
David Penn Soskin, M.D., Boston, MA  
Barbara Sparacino, M.D., Miami Beach, FL  
S.E. Specter, M.D., Ph.D., Los Angeles, CA  
Edward Lee Spencer, M.D., Los Angeles, CA  
Semen S Spirin, M.D., Lakewood, NY  
Shiva Prakash Srinivasan, M.B.B.S., M.D., Baltimore, MD  
Suma Srisaila, M.D., New City, NY  
Nicole Kimberly Stahl, M.D., Katy, TX  
Michael Terence Stanger, M.D., Berkeley, CA



Cassie Jo Stanton, D.O., Lansing, MI  
Erin Marie Gillings Stanton, M.D., New Orleans, LA  
Laura Stanton, M.D., Providence, RI  
Emily Steinberg, M.D., New York, NY  
Jessica R Stern, M.D., Aurora, CO  
Brian Richard Still, M.D., Bath, ME  
Joseph Brian Stoklosa, M.D., Arlington, MA  
Eleonora Stotland, D.O., Brooklyn, NY  
Angela Katherine Strain, M.D., Durham, NC  
David Henry Streckmann, M.D., Metairie, LA  
Sarah J Stringer, M.D., Portales, NM  
Zachary Stucki, D.O., Salt Lake City, UT  
Marcos Antonio Suarez, M.D., Kansas City, MO  
Kalyani Ganjigunte Subramanyam, M.D., Northampton, MA  
Javeed Iqbal Sukhera, M.D., Rochester, NY  
John Philip Sullivan, M.D., San Diego, CA  
Alfred Yu Feng Sun, M.D., Fairfax, VA  
Cynthia Janelle Sung, D.O., Birmingham, AL  
Toral Shailesh Surti, M.D., New Haven, CT  
Erica Lynn Swicegood, M.D., Lewisville, TX  
Xingchun Tang, M.D., Dallas, TX  
Khwaja Khusro Tariq, M.D., Wilmington, DE  
Hina Tasleem, M.B.B.S., Brooklyn, NY  
Frank Kenneth Tedeschi, M.D., New York, NY  
Alan Robert Teo, M.D., Ypsilanti, MI  
Tushar Purushottam Thakre, M.D., Ph.D., Shaker Heights, OH  
Eva Maria Theodosiadis, M.D., Astoria, NY  
Gretchen Elizabeth Thiemecke, D.O., Orchard Park, NY  
Joseph Ryan Thoits, M.D., Portland, OR  
Crystal Rose Tholany, M.D., New York, NY  
Sujan Thyagaraj, M.D., Roswell, NM  
Sarah Kathryn Tighe, M.D., Baltimore, MD  
Arthur Iulius Timbus, M.D., Allison Park, PA  
Christopher Wilkinson Tjoa, M.D., Philadelphia, PA  
Margaret Rose Tom, D.O., Memphis, TN  
Marisa Sara Palumbo Toups, M.D., Dallas, TX  
Eldene Towey, M.D., New York, NY  
Maria Lee Trent-Watson, M.D., Baltimore, MD  
Michelle Lauren Tricamo, M.D., New York, NY  
Adam Christian Tripp, M.D., Ph.D., Pittsburgh, PA  
Robert Michael Troiano, M.D., San Antonio, TX  
Napatia Moree Tronshaw, M.D., Homewood, IL  
Melissa Rose Trovato, M.D., Bonita, CA  
Pauline Tsai, M.D., New York, NY  
Tiffany Yea-Kuang Tsai, M.D., Yorba Linda, CA  
Gabriel Tudose, M.D., Ann Arbor, MI  
Susannah Tung, M.D., New York, NY  
Terri Loretta-Bernice Turner, M.D., Philadelphia, PA  
John William Tyson, M.D., Cambridge, MA  
Elizabeth Ucheoma-Cofield, M.D., Rowlett, TX  
Mai Uchida, M.D., Cambridge, MA  
Khemdat Umadat, M.D., Elmont, NY  
Brandon Todd Unruh, M.D., Cambridge, MA  
Holly Janelle Valerio, M.D., Philadelphia, PA  
Peter Johannes Van Roessel, M.D., Ph.D., New York, NY  
Elizabeth Varghese, M.D., Floral Park, NY  
Navid Vahdat Vasseyy, M.D., Spokane, WA  
Ebonie Michele Vazquez, M.D., Carson, CA  
Adele Veksman, M.D., Brooklyn, NY  
Jennifer Velandar, M.D., New York, NY  
Ramakanth Kamaraju Vemuluri, M.D., M.R.C.Psych.,  
Montgomery, AL

Anoop Kumar Vermani, M.D., Oak Park, IL  
Jeffrey A Vernon, D.O., White Plains, NY  
Thomas W Vertrees, M.D., Centennial, CO  
Amelia Kharman Villagomez, M.D., Brookline, MA  
Jasbir Kaur Virk, M.D., Minneapolis, MN  
Joseph Constantine Vlaskovits, M.D., Avon, OH  
Suzanne Renee Voelker, D.O., Lewiston, NY  
Sara Elizabeth Vogel, M.D., Los Angeles, CA  
Shannon Louise Wagner, M.D., Chicago, IL  
Jared John Wakeman, M.D., Washington, DC  
Bettina Bridgford Walker, M.D., Euless, TX  
Natalie Michael Wallace, M.D., Grosse Pointe Park, MI  
Sophia Wang, M.D., New York, NY  
Jonathan Lam Yuen Watt, M.D., Vancouver, WA  
Marlynn H Wei, M.D., J.D., Brooklyn, NY  
April Eve Welborn, M.D., Durham, NC  
Dawit Assefa Weldemichael, M.D., Chesterfield, MO  
Jordana Gaylen Werner, M.D., Raleigh, NC  
Angelica Portillo White, M.D., Indianapolis, IN  
Dennis Andrew White, M.D., Yucca Valley, CA  
Gabriel Tomas White, M.D., Chula Vista, CA  
Jennifer Marie White, M.D., Tampa, FL  
Kevin Jackson Whitley, M.D., Birmingham, AL  
Jeremy Michael Wilkinson, M.D., Burlingame, CA  
David John Williams, M.D., Denver, CO  
Raquel Williams, M.D., Jacksonville, NC  
Aaron Wilson, M.D., Phoenix, AZ  
Frederic Jean Francois Wilson, M.D., Austin, TX  
Stephanie Denise Wilson, M.D., Washington, DC  
Logan Kristen Wink, M.D., Mooresville, IN  
Jason Aaron Winston, M.D., Westlake Village, CA  
Christine Louise Wolfe, M.D., Highland Falls, NY  
Howard Leland Wong, M.D., League City, TX  
Julia Kristina Wood, M.D., Cambridge, MA  
Joshua David Woolley, M.D., Ph.D., San Francisco, CA  
Benjamin Eguono Wowo, M.D., East Stroudsburg, PA  
Pauline Wu, D.O., Los Angeles, CA  
Arunditi Xantus, M.D., Miami, FL  
Ke Xu, M.D., Ph.D., Trumbull, CT  
Farzin Yaghmaie, M.D., M.A., Los Angeles, CA  
Amy Yang, M.D., New York, NY  
Dan Yang, M.D., Seattle, WA  
Feroz Yaqoob, M.D., Lubbock, TX  
Michael Stephen Gary Yasinski, M.D., Glendale, AZ  
Jack Cheng-Chieh Yen, M.D., Chicago, IL  
Zaakir Khaliq Yoonas, M.D., Palo Alto, CA  
Chainllie Young, M.D., White Plains, NY  
Erik Nikolaus Youngdale, M.D., Sacramento, CA  
Genevieve Yuen, M.D., Ph.D., New York, NY  
David Peter Yuppa, M.D., Wayne, NJ  
Ruchika Sonia Yusufji, M.B.B.S., Shreveport, LA  
Natalie Simone Yzer, M.D., Baltimore, MD  
Yelena S. Zack, M.D., Astoria, NY  
Michael Stanislaw Zajfert, M.D., Summit, NJ  
Lisa Maher Zakhary, M.D., Ph.D., Somerville, MA  
Erin A. Zerbo, M.D., Little Falls, NJ  
Marlene Zouein Blaizot, M.D., Provo, UT  
Juan Carlos Zuberbuhler, M.D., New York, NY

*The following successfully completed the board examination in November 2011.*

---

## Child and Adolescent Psychiatry

---

Nancy Hussein Abdel-Wahab, M.D., Brooklyn, NY  
John Michael Adams, M.D., San Antonio, TX  
Adeola Y. Adelayo, M.D., Peoria, AZ  
Khalid Imran Afzal, M.D., Hickory Hills, IL  
Nalini Agarwal, M.D., Ypsilanti, MI  
Ejiro Vivian Agboro-Idahosa, M.D., Dakota Dunes, SD  
Collette Ah-Tye, M.D., Chapel Hill, NC  
Hani Ahmad, M.D., Fort Wayne, IN  
Faisal Ahmed, M.D., Bloomington, IL  
Olayinka Morenike Ajayi, M.D., Bensalem, PA  
Scott Myles Albin, D.O., Great Neck, NY  
John Richard Aldous, M.D., San Diego, CA  
Orna Alpert, M.D., Somerset, NJ  
Mona Akhtar Alvi, M.D., Southlake, TX  
Heidi Lynn Arnold, M.D., Edina, MN  
Humera Athar, M.D., West Bloomfield, MI  
David Louis Atkinson, M.D., Fort Worth, TX  
Julie Elizabeth Atkinson, M.D., Lexington, KY  
Joseph Michael Austerman, D.O., Cleveland, OH  
David Mathew Aversa, M.D., M.P.H., Woodbridge, CT  
Lauren Meredith Avery, M.D., Cambridge, MA  
Jean Young Bai, M.D., Abington, PA  
Anita Bajaj, M.D., Ellicott City, MD  
Ivana Balic, M.D., San Antonio, TX  
Nicole Marie Ballinger, D.O., Apo, AE  
Hasan Ahmad Baloch, M.D., Raleigh, NC  
Alok Banga, M.B.B.S., M.P.H., Watertown, CT  
Virginia Ferreira Barbosa, M.D., Lexington, KY  
Brian Edward Barczak, M.D., Bowling Green, KY  
John Carter Barker, M.D., San Francisco, CA  
Archana Barry, M.D., Prospect, KY  
Claire Monica Belgrave, M.D., Chesapeake, OH  
Henry Eric Bender, M.D., San Francisco, CA  
Smitha Bhandari, M.D., Atlanta, GA  
Annabelle Blanchet, M.D., Philadelphia, PA  
Kelly Marie Blankenship, D.O., Carmel, IN  
Tamara Neandir Boers, M.D., Seapoint, n/a  
Melissa M Bowker-Kinley, M.D., Falmouth, ME  
Lauren Anne Boydston, M.D., Seattle, WA  
Jill K Bradshaw, M.D., Wheeling, WV  
Khyati Brahmhatt, M.D., Sacramento, CA  
Joshua Eugene Braun, M.D., Westfield, NJ  
Tuvia Breuer, D.O., Woodmere, NY  
Ayanna Janell Brown, M.D., Houston, TX  
Charlene Renee Brown, M.D., Aurora, IL  
Peter Paul Buonaccorsi, M.D., Fayetteville, NC  
Sara Marie Calvert, M.D., West Orange, NJ  
David Rine Camenisch, M.D., Seattle, WA  
Caroline Anne Campion, M.D., New Orleans, LA  
Michelle Lee Cantu, M.D., Helotes, TX  
Jane Elizabeth Caplan, M.D., Scottsdale, AZ  
Angel A. Caraballo, M.D., New York, NY  
Lynda Lee Carlisle, M.D., Tacoma, WA

Gloria Maria Carrera, M.D., Brighton, MA  
Scott C Carroll, M.D., Albuquerque, NM  
Keisha Brown Carter, M.D., Tucker, GA  
Brady Geronimo Case, M.D., Barrington, RI  
Kristen Caruso Case, M.D., Edina, MN  
Benjamin Russell Chan, M.D., Salt Lake City, UT  
Sarah Jane Chaumette, M.D., Albany, CA  
David Tahwei Chen, M.D., Silver Spring, MD  
Natalya Chernyak, M.D., Savannah, GA  
Cherry Chevy, M.D., Raleigh, NC  
Lian Phay Chien, M.D., San Gabriel, CA  
Sangeeta Reddy Chitlu, M.D., Leesburg, VA  
Nicole Ann Christenson, M.D., Sioux Falls, SD  
Todd Robert Christiansen, M.D., Silver Spring, MD  
Joseph Michael Cocozzella, M.D., Newton, MA  
LaTricia Coffey, M.D., Las Vegas, NV  
Sarah Davies Cohen, M.D., Dobbs Ferry, NY  
Vegas Coleman, M.D., Poplar Bluff, MO  
Kamau Rashid Collins, M.D., Parkville, MD  
Michael Jude Colston, M.D., Arlington, VA  
Takesha Jenene Cooper, M.D., Menlo Park, CA  
Jacqueline Countryman, M.D., Beavercreek, OH  
Antonio Miguel Cubano Cruz, M.D., Heathrow, FL  
Tracy Suzanne Cummings, M.D., Cincinnati, OH  
Antoinette Marie Cusick, M.D., Miami, FL  
Richard Eugene D'Alli, M.D., Chapel Hill, NC  
James Steven Demer, M.D., Baldwinsville, NY  
Maria Claire Demosthenous, D.O., Redwood City, CA  
Atit R Desai, M.D., Madison, WI  
Seema Desai, M.D., Randolph, NJ  
Sandra J. DeSantis, M.D., Bolton Landing, NY  
Rashmi Sameer Deshmukh, M.D., Fremont, CA  
Amy Ruvini Dewar, M.D., Washington, DC  
Gurjeet Kaur Dhallu, M.D., White Plains, NY  
Colin Porus Dias, M.D., Tujunga, CA  
Kimberly Michelle Dobbins, M.D., Rowlett, TX  
Michael Anders Donndelinger Beldon, M.D., Roseville, MN  
Richard Raymond Dopp, M.D., Ann Arbor, MI  
Susan Stanton Douglas, M.D., Greensburg, PA  
Mitchell M Douglass, M.D., Kansas City, KS  
Joshua Empedocles Dow, M.D., Portland, OR  
Alicia Ines Duenas, M.D., Santa Rosa, CA  
Sara Marie Dumas, M.D., Canton, MI  
Jennifer Lorraine Edwards, M.D., Leonardo, NJ  
Sarah Michael Edwards, D.O., Baltimore, MD  
Kathryn J. Egan, M.D., Honolulu, HI  
Umonoibalo Ehimare, M.D., Guilford, CT  
Todd Louis Eisenberg, M.D., Brookfield, WI  
Shana Stein Elga, M.D., Princeton, NJ  
Michael Alan Ellis, D.O., Columbus, GA  
Mary Megan Embrescia, M.D., Charleston, SC  
Harry Todd Enderlin, M.D., Wake Forest, NC  
Mandy Lee Evans, M.D., Chicago, IL  
Sheritia Tijuana Falcon, M.D., Durham, NC  
Michele Jodi Feinberg, M.D., Westport, CT  
Zachary William Feldman, M.D., Raleigh, NC

Silvia Paola Fernandez, M.D., Fort Lauderdale, FL  
Alexis Marianna Fertig, M.D., Pittsburgh, PA  
Marcy Jo Forgey, M.D., M.P.H., Playa Del Rey, CA  
William Pangburn French, M.D., Seattle, WA  
Catherine Ruth Friedman, M.D., Cranston, RI  
Gadalla Mohsen Gadalla Makar, M.D., Queens Village, NY  
Sheela Gade, M.D., Fresno, CA  
Felecia Ingram Garner, M.D., Pearland, TX  
Susan Therese Garrett, M.D., San Francisco, CA  
David Garrison, M.D., Rochester, NY  
Gabriella Geiszt, M.D., Bloomfield, MI  
Samuel Gelernter, M.D., Las Vegas, NV  
Andrew James Gerber, M.D., Ph.D., New York, NY  
Talya Gilaad, M.D., Roslyn, NY  
Emily Reiter Goddard, M.D., Fleming Island, FL  
Aaron Oree Godwin, M.D., Atlanta, GA  
Tristan L Gorrindo, M.D., Charlestown, MA  
Julie Medlin Goslee, M.D., West Hartford, CT  
Regina Rona Graham, M.D., Berkeley, CA  
Christopher Kenneth Haas, M.D., Rapid City, SD  
Arlene Debora Hagen, M.D., Honolulu, HI  
Moataz Yousef Haggag, M.D., Dix Hills, NY  
Carmen Lydia Haley, M.D., Denver, CO  
Charles Edward Hall IV, M.D., Richmond, VA  
Stephanie Hall, M.D., Knoxville, TN  
Ladan Hamdheydari, M.D., Middletown, CT  
Shazia Hamid, M.D., Dallas, TX  
Hesham Mohamed Hamoda, M.D., M.P.H., Canton, MA  
Teresa Menke Hargrave, M.D., Syracuse, NY  
Roberta Natalie Hellman, M.D., Great Neck, NY  
Kyle Evan Hinman, M.D., Mountain View, CA  
Allison Rose Holt, M.D., Saint Paul, MN  
David Soonil Hong, M.D., Stanford, CA  
Jaime Patricia Hook, M.D., Clayton, MO  
Matthew Glover Hopperstad, M.D., New York, NY  
Liwei Livia Hua, M.D., Brighton, MI  
Alexander Shaoluen Huang, M.D., Los Angeles, CA  
David Austin Hudson, M.D., Richmond, KY  
Leslie A. Hulvershorn, M.D., Indianapolis, IN  
Andrea Landers Huntley, M.D., Florence, AL  
Mohammad Ilyas, M.D., M.H.A., Frankfort, IL  
Fatima Malene Imara, M.D., Los Angeles, CA  
Nina Sarah Jacobs, M.D., Enfield, CT  
Lisa Nicole Pfeffer Jager, M.D., Potomac, MD  
Ahmed Jahangeer, M.D., Murrysville, PA  
Kathryn Eckstein Jalovec, M.D., Nashville, TN  
Shannon Nicole Jap, M.D., New Albany, OH  
Sireesha Kanthi Jathavedam, M.D., Tenafly, NJ  
Arshdeep Singh Jawandha, M.D., La Mirada, CA  
Geethani Renuka Jayasundera, M.D., Northville, MI  
Elon Russell Jeffy, M.D., Tulsa, OK  
Hans Christopher Jensen, M.D., Madison, WI  
Sukhi Johal, M.D., Reno, NV  
Nathaniel W. Johns, M.D., Strongsville, OH  
Mark Clayton Johnson, M.D., West Chester, OH  
Heather Lynn Jones, M.D., Portland, OR

Megan Kavanaugh Jones, M.D., Lakewood, CA  
Meghna N. Joshi, M.D., McKinney, TX  
Sachidanand D Kamtam, M.D., Downingtown, PA  
Karen Kando, M.D., Phoenix, AZ  
Niranjan Subhash Karnik, M.D., Ph.D., Chicago, IL  
Patrick Michael Kelly, M.D., Baltimore, MD  
Jessica Candelora Kettel, M.D., Ph.D., Pittsburgh, PA  
Lia Rothbaum Kettenis, M.D., Bloomington, IN  
Kashif Abdullah Khan, M.D., Tecumseh, MI  
Mohammad Akram Khan, M.D., Mountain Top, PA  
Andrew Reza Khavari, M.D., Kettering, OH  
Shawn Akhtar Khavari, M.D., Edmond, OK  
Kamran Kizilbash, M.D., London, ON  
Steven David Klamerus, M.D., M.P.H., Marquette, MI  
Ann Michelle Kledzik, M.D., Zionsville, IN  
Angelica Louise Kloos, D.O., Fairfax, VA  
Dana Lee Kober, M.D., Houston, TX  
Ian Michael Kodish, M.D., Ph.D., Seattle, WA  
Andrew Lee-Wah Koo, M.D., Montpelier, VT  
Kathleen Ann Koth, D.O., Brookfield, WI  
Alejandro Dario Kudisch, M.D., D.F.A.P.A., McAllen, TX  
Ilana Brooke Kulman, M.D., New York, NY  
Pilar Lachhwani, M.D., Beachwood, OH  
Benjamin Randolph Lafferty, M.D., Huntington, WV  
Brian Patrick Lahey, M.D., Village Of Loch Lloyd, MO  
Beverly Jean Lallande, M.D., Newport Beach, CA  
Kerry Lee Landry, M.D., Hillsborough, NC  
Agheigh Lankerani, D.O., Columbia, MD  
Eric Timothy Lavy, M.D., Post Falls, ID  
Kari Beth Law, M.D., Fairmont, WV  
Christina J Lee, M.D., New Haven, CT  
Gordon C. LeGrand, M.D., New York, NY  
Alyse Folino Ley, D.O., Okemos, MI  
Angela Michelle Liess, M.D., Cape Elizabeth, ME  
L. Charollette Lippolis, D.O., M.P.H., Aurora, CO  
Howard Yee Liu, M.D., Omaha, NE  
Timothy Cheung-Kay Liu, M.B.B.S., Del Mar, CA  
Gemma Marie Lopez, M.D., Daly City, CA  
Hervey Mac Madden Jr., M.D., Judsonia, AR  
Ronald Magat, M.D., Cumming, GA  
Khalid Mahmood, M.D., Mountain Top, PA  
Mojgan Makki, M.D., Chicago, IL  
Darren Louis Mancuso, D.O., Albuquerque, NM  
Olajide Hakeem Masha, M.D., Richmond, TX  
Carnetha Nashun Mathews, M.D., Hopkins, SC  
Jeremy Michael Matuszak, M.D., Reno, NV  
Michelle Lee Mayfield Jorgensen, M.D., Fargo, ND  
Rachele Mary McCarthey, M.D., Salt Lake City, UT  
Debra Valori McQuade, M.D., Warner, NH  
Kirk Allen Meekins, M.D., Charleston, SC  
Rekha Menon, M.D., Chicago, IL  
Parag Ghanshyam Merai, M.D., Orland Park, IL  
Aurora Mary Mignosa, M.D., Waco, TX  
Elham Eliana Mizani, M.D., Los Angeles, CA  
Sarah Shaheen Mohiuddin, M.D., Canton, MI  
Miguel Jose Morales, M.D., Oviedo, FL

Susan Ann Morine, M.D., Pittsburgh, PA  
Kweli Ayo Akua Moyo, M.D., Decatur, GA  
Michael Joseph Mullin, M.D., Aurora, CO  
Ana Maria Muniz-Leen, M.D., Coral Gables, FL  
Margarita Munoz-Dummit, M.D., Chappaqua, NY  
Sunanda Muralee, M.D., Hamden, CT  
Ethan Joseph Musgrave, M.D., Charlotte, NC  
Marija Dragica Mutabdzic, M.D., Oswego, NY  
Douglas Andrew Newton, M.D., M.P.H., Denver, CO  
Allison Marie Nitsche, M.D., Ogden, UT  
Emmanuel Nwapa, M.D., Las Vegas, NV  
Felix Chukwuemeka Nwokolo, M.D., Clearwater, FL  
Rebecca Suzanne O'Donnell, M.D., Chicago, IL  
Joseph Sean O'Garr, M.D., Newton, MA  
Thomas Christian O'Reilly, M.D., Medford Lakes, NJ  
Nyrma Noemi Ortiz-Vazquez, M.D., Coral Springs, FL  
Adefolake Oshodi, M.D., Long Island City, NY  
Soyna Owley, M.D., Rye, NY  
Tamara Julia Palka, M.D., Philadelphia, PA  
James Robert Parks, M.D., Fayetteville, AR  
Daria Andreea Pasca, M.D., Sunnyvale, CA  
Divyansu D Patel, M.D., Austin, TX  
Khendra Iman Peay, M.D., Frederick, MD  
Fernando Pomeranec, M.D., Miami Beach, FL  
Imran Posner, M.D., Merion Station, PA  
Ervin Delmar Prewette II, M.D., Greer, SC  
Gregory Alan Prier, D.O., Honolulu, HI  
Susanna Leigh Quasem, M.D., Nashville, TN  
Adeel Rabbani, M.D., M.P.H., Mobile, AL  
Christopher Thomas Raczynski, M.D., Arlington, VA  
Gautam Rajendran, M.D., Denver, CO  
Jesse Andrew Raley, M.D., Columbia, SC  
Subhashree Ramesh, M.D., Voorhees, NJ  
Asma Rashid, M.D., M.P.H., Brookline, MA  
Moitreyee B Reddy, M.D., Wauwatosa, WI  
Prasad V. Reddy, M.D., Tulare, CA  
Gloria Marta Reeves, M.D., Ellicott City, MD  
Angela Michelle Reiersen, M.D., Creve Coeur, MO  
Aaron Omari Reliford, M.D., New York, NY  
Jennifer MacLaughlin Richards, M.D., M.B.A., Durham, NC  
Robert Wadsworth Richards Jr., M.D., Greenville, SC  
Maia Shinobu Robison, M.D., Seattle, WA  
Jason Edward Rock, M.D., M.P.H., Youngstown, OH  
Kelly Marie Rogalski, M.D., Northville, MI  
Cynthia Elise Rogers, M.D., Saint Louis, MO  
Jamison Eugene Rogers, M.D., Seekonk, MA  
Randolph Biglang-Awa Roxas, M.D., Sonoma, CA  
Kevin Bruce Sanders, M.D., Nashville, TN  
Gisela Maria Sandoval, M.D., Ph.D., Chicago, IL  
Vinay Paran Saranga, M.D., Mission, KS  
David Aryeh Sasso, M.D., M.P.H., New Haven, CT  
Tiffany Nicole Sauls, M.D., Corvallis, OR  
Svetlana L. Savchenko, M.D., M.P.H., Timonium, MD  
Corliss Vogt Savoie, M.D., Baltimore, MD  
John Lester Schaeffer, D.O., Santa Fe, NM  
Kathryn Marie Schak, M.D., Rochester, MN

Katherine Anne Schmitt, M.D., Oregon, WI  
Alina Nicole Schneider, M.D., Cape Girardeau, MO  
Robert Carlton Sears, M.D., Klamath Falls, OR  
Heerain Ashok Shah, M.D., Suwanee, GA  
Payal K Shah, M.D., Bronx, NY  
Tehmina Shakir, M.D., Northville, MI  
Kalpana Shanmugam, M.D., Charlotte, NC  
Ajay Kumar Sharma, M.D., New Albany, OH  
Jonathan Joel Shepherd, M.D., Pikesville, MD  
Susie Shin-Calandrella, M.D., Petaluma, CA  
Basem Kaleem Shlewiet, M.D., Furlong, PA  
Shree Om Shrestha, M.D., Columbia, MO  
Adriana Elizabeth Shuster, M.D., Yonkers, NY  
Asra Siddiqi, M.D., Nesconset, NY  
Matthew Scott Siegel, M.D., Yarmouth, ME  
Mireya Silva, M.D., Galveston, TX  
Sherri Marie Simpson, M.D., Houston, TX  
Gagandeep Singh, M.D., Monroe Township, NJ  
Sharon Skariah, M.D., New Hyde Park, NY  
Ana Carla Perez Smith, M.D., Durham, NC  
Jacqueline Nicole Smith, M.D., Chapel Hill, NC  
Karen Wright Sondergaard, M.D., Trumbull, CT  
Melina Spyridaki-Dodd, M.D., Vincennes, IN  
Smita Srivastava, M.D., Medford, MA  
Maria Mary Stamatakos, M.D., Columbus, OH  
Candace King Stanley, M.D., Mountain Brk, AL  
Christopher Simon Stanley, M.D., Mountain Brk, AL  
Kelley Marie Starling, M.D., Helotes, TX  
Hanna Elizabeth Stevens, M.D., Guilford, CT  
Jonathan Robert Stevens, M.D., Marblehead, MA  
Karen Reneau Stewart, M.D., Mableton, GA  
Gayle Lois Strandberg, M.D., Pittsburgh, PA  
Katharine Anne Stratigos, M.D., New York, NY  
Alexander Sangor Strauss, M.D., Cherry Hill, NJ  
Jeffrey Robert Strawn, M.D., Villa Hills, KY  
Christopher Douglas Streeter, M.D., Imperial Beach, CA  
Oliver Max Stroeh, M.D., Nashville, TN  
Enrico M Suardi, M.D., Washington, DC  
Meenakshi Suman, M.D., Ellicott City, MD  
Virginia Summerville, M.D., Bayside, NY  
Vivian Sun, M.D., San Ramon, CA  
Naomi Elizabeth Surman, M.D., Nolanville, TX  
Anil Kumar Swarup, M.D., Clinton, MS  
Nazmul Kabir Talukdar, M.D., Ridgeland, MS  
Michael Theodore Thurman, M.D., Denver, CO  
Russell Hardin Tobe, M.D., Riverdale, NJ  
Megan Toufexis, D.O., Tampa, FL  
Gargi Trivedi, M.D., Las Vegas, NV  
Benjamin L Troy, M.D., Granger, IN  
Ruth Tsivkin, M.D., Brooklyn, NY  
Adrienne Elizabeth Turner, M.D., Charlottesville, VA  
Daniel William Ulrich, M.D., Waipahu, HI  
Anu Upadhyay, M.D., Kendall Park, NJ  
Christina Maria Vaglica, D.O., Dix Hills, NY  
Mackenzie Allison Varkula, D.O., Lyndhurst, OH  
Kavita Mohan Vasu, M.D., Forest Hills, NY



Sridevi Naga Vemulapalli, M.D., Conroe, TX  
Kelda Harris Walsh, M.D., Indianapolis, IN  
Heather Lynn Waterhouse, M.D., Madison, TN  
LaKeisha S. Watson, M.D., Columbia, SC  
Natalie Danitza Weder, M.D., New York, NY  
Thomas Joseph Weigel, M.D., Jamaica Plain, MA  
Kelly McDowell Welles, M.D., Orange, CA  
Sarah Elizabeth Wells Slechts, M.D., Biltmore Lake, NC  
Joshua Paul Werblin, M.D., Bluefield, WV  
Marcus August Westerman, M.D., Ph.D., Lino Lakes, MN  
Jennifer Leigh Whaley, M.D., Atlanta, GA  
Robert Wightman Whelpley, M.D., Almond, NY  
Michelle Antoinette Widener, M.D., Columbia, SC  
Lonnie Andrea Widmer, M.D., Minneapolis, MN  
Andrew Zachary Williams, M.D., New Orleans, LA  
John Pasquale Williams Jr., M.D., Bryn Mawr, PA  
Ryan Matthew Williams, M.D., Edina, MN  
Brent Austen Wilson, M.D., Atlanta, GA  
Mayin Wong, D.O., Falls Church, VA  
Elizabeth Stover Woods, M.D., Madison, WI  
Wendell Wu, M.D., Arlington, VA  
Rick Alan Yavruian, D.O., Twin Falls, ID  
Margaret Ji-Hyun Yoon, M.D., New York, NY  
Amy Marie Yule, M.D., Cambridge, MA  
Jennifer Cleope Zumarraga, M.D., San Jose, CA

## Maintenance of Certification

*The following were awarded maintenance of certification in February 2011.*

---

### Psychiatry

---

Patricia Karen Abanilla, M.D., New York, NY  
Ayman Abdelhamid, M.D., Red Hook, NY  
Fawaz Abdrabbo, M.D., Ridgeland, MS  
Ahmed Ibrahim Abouesh, M.D., Chico, CA  
Regis F. Acosta, M.D., Cedar Brook, NJ  
Michael M. Adams, M.D., New York, NY  
Ayodele Egun Adeigbola, M.D., New York, NY  
Michelle Adler, M.D., Ocean, NJ  
David Eric Adson, M.D., Edina, MN  
Ali Ahmadi, M.D., M.F.T., Macon, GA  
Saeeduddin Ahmed, M.D., Wyomissing, PA  
Kristin Stievater Ahrens, M.D., Buffalo, NY  
Maleeha Ajmal Ahsan, M.D., Naperville, IL  
Rasheda Nyeem Ahsanuddin, M.D., Morganton, NC  
Abimbola Olufunke Akanji, M.D., Suffolk, VA  
Khairul Shaheed Alam, M.D., Pittsburgh, PA  
Metty Biju Albert, M.D., Saratoga, CA  
Constance Jeanette Alexander, M.D., Charleston, SC  
Pamela A. Alfara, M.D., Bakersfield, CA  
Kishwar Ali, M.D., Naperville, IL  
Rizwan Ali, M.D., Roanoke, VA  
Daniel Andrew Alicata, M.D., Honolulu, HI  
Sean Thomas Allan, M.D., New York, NY

Robert Eugene Alley, M.D., Henderson, KY  
Gustavo Alva, M.D., Costa Mesa, CA  
Anca Simona Amighi, M.D., New York, NY  
Karneya Jafa Ancselovits, M.D., Flushing, NY  
Maura Andronic, M.D., Saint Clairsville, OH  
Miguel A. Arce, M.D., Bronx, NY  
Miles Ferdi Ardaman, M.D., Nashville, TN  
Pradeep Arora, M.D., Jacksonville, FL  
Moirra Frierson Artigues, M.D., Cary, NC  
Babatunde Asemota, M.D., Yonkers, NY  
Anjum Shehzad Ashraf, M.D., Newburgh, IN  
Harun Aslam, M.D., Irvine, CA  
Manal Ismail Assi, M.D., Ann Arbor, MI  
Pavitar Preet Aulakh, M.D., Fairfax Sta, VA  
Rahat Aulakh, M.D., Pleasant Hill, CA  
Sanda Soe Aung, M.D., Cambridge, MA  
Kehinde Adeola Ayeni, M.D., Farmingtn Hls, MI  
Rukshan Azhar, M.D., Baytown, TX  
Olusanmi Jacob Babatola, M.D., Bonaire, GA  
Muhammad Baber, M.D., Saint Louis, MO  
Michelle Kathleen Bacares, M.D., Niskayuna, NY  
Nancy Jean Baehr, M.D., Edison, NJ  
Susan Elaine Bailey, M.D., Baltimore, MD  
Sumathi Balaraman, D.O., Ventura, CA  
Maria Luisa Bundang Baldomero, M.D., Oshkosh, WI  
Raphael Ezra Barda, M.D., Tulare, CA  
Shannon Rae Barnett, M.D., Elkridge, MD  
Thomas Beach Barrett, M.D., Portland, OR  
Lorena Monica Barrio, M.D., Woodland Hills, CA  
Iveta Barsky, M.D., Merrick, NY  
Scott Edward Patrick Baymiller, M.D., Germantown, TN  
Jonathan Bear, M.D., Ph.D., Orlando, FL  
Rafael Alberto Beltran-Durango, M.D., Saint Petersburg, FL  
Tracy Lynn Benford Price, M.D., Fort Knox, KY  
Robert Harris Bennett, D.O., Cherry Hill, NJ  
Scott Andrew Berger, M.D., Staten Island, NY  
Paul Michael Berkowitz, M.D., Scottsdale, AZ  
Lesley Ann Joanna Bernard-Pantin, M.D., Gainesville, FL  
Jon Eric Berner, M.D., Ph.D., Woodinville, WA  
Michael Dana Bernot, M.D., Old Westbury, NY  
Debra Lynn Betow, M.D., Prior Lake, MN  
R. Ellen Bettigole, M.D., Troy, NY  
Ewa Adamiec Beyga, M.D., Fort Smith, AR  
Sunil Kumar Bhatia, M.D., Greer, SC  
Amarjeet Singh Birdi, M.D., Dayton, OH  
Ehsan Ali Biswas, M.D., Windham, NH  
Ghassan Bitar, M.D., Dunlap, IL  
Ronald Sante Biviano, M.D., Ontario, NY  
Gabrielle Levine Blackman, M.D., Baltimore, MD  
Karla Aurora Blackwood, M.D., Ann Arbor, MI  
Colleen Ann Blanchfield, M.D., Reston, VA  
Mark Randall Bloch, M.D., Walnut Creek, CA  
Chandralekha Bommakanti, M.D., Oshkosh, WI  
Jeffrey Lynn Bonacci, M.D., Charlottesville, VA  
Burke Joseph Bonilla, M.D., Fresno, CA  
Lamia Kamel Botros, M.D., Montvale, NJ  
Joshua Findley Boverman, M.D., Portland, OR  
Phillip J. Bowman, M.D., Beverly Hills, CA  
Craig E. Boyajian, M.D., Concord, MA

Lorin Debora Boynton, M.D., Seattle, WA  
Chad Bradford, M.D., San Antonio, TX  
Armando Medina Braganza, M.D., Paramus, NJ  
Nikki Reeves Brannon, M.D., Decatur, AL  
Angela Harrison Brantley, M.D., Germantown, MD  
Dell H. Braunsdorf, M.D., Santa Fe, TX  
Karen Ujiki Breakstone, M.D., Bay Harbor Islands, FL  
Sandra Jean Bremner-Dexter, M.D., Spokane, WA  
Olufunke Louise Brimmo-Longe, M.D., Carmel, IN  
Robbin Joy Broadman, M.D., Sonoma, CA  
John Oliver Brooks III, M.D., Ph.D., Los Angeles, CA  
Kenneth Michael Brown, M.D., M.P.H., Hampstead, NH  
Robert Lee Brown Jr., M.D., Santa Cruz, CA  
Spencer Alan Brown, M.D., Hummelstown, PA  
Dorothy Elizabeth Brozek, M.D., Somerville, MA  
Michael Shawnessee Burke, M.D., Poulsbo, WA  
Cynthia Mary Burnham, D.O., Scarborough, ME  
Harriet Bursztyn, M.D., Champaign, IL  
Barbara Anne Burtner, M.D., Kissimmee, FL  
Kulwant Kaur Buttar, M.D., Atascadero, CA  
Louis Aaron Calderon, M.D., Atlanta, GA  
Fernando Javier Calderon-Julia, M.D., San Juan, PR  
Maria Josefina S. Caparas, M.D., Roseville, CA  
Marc A. Capobianco, M.D., San Diego, CA  
Susan Andrea Carey, M.D., Boston, MA  
Michael Mario Caruso, M.D., Litchfield, CT  
Cletus Savio Carvalho, M.D., Lexington, KY  
Deborah Daniels Carver, M.D., New York, NY  
Margaret Ogden Cassada, M.D., Leland, MS  
Maria Angela Aguilar Catolico, M.D., Midlothian, VA  
Omer Cermik, M.D., Cumberland, RI  
Robert Lee Chalfant Jr., M.D., Breckenridge, CO  
Robert Andrew Chambers, M.D., Indianapolis, IN  
Michael K. Champion, M.D., Santa Fe, NM  
Leslie Patricia Chandel, M.D., Roanoke, VA  
Tanmoy Chandra, M.D., Naperville, IL  
Geetha Devi Chandrasekhar, M.D., Sharon, MA  
Jacquelyn Brenda Chang, M.D., Burlingame, CA  
Arvinder Pal Singh Chani, M.D., Bowling Green, KY  
Cynthia Roxanne Chatterjee, M.D., Palo Alto, CA  
Donna Te-Wei Chen, M.D., Charlottesville, VA  
Adam Richard Chester, D.O., Great Neck, NY  
Benjamin N. R. Cheyette, M.D., Ph.D., Burlingame, CA  
Mikhail O. Chizhikov, M.D., Danville, VA  
Connie Gil-Eun Choi, M.D., Chicago, IL  
Hung-Ming Chu, M.D., San Francisco, CA  
Jane Yeoun Chung, M.D., Los Angeles, CA  
Julia Anne Chung, M.D., Torrance, CA  
Lydia Ann Chwastiak, M.D., New Haven, CT  
Angel Cienfuegos, M.D., Los Angeles, CA  
Steven Joseph Ciric, M.D., New York, NY  
Raymond Harlech Clark, M.D., Conway, AR  
Bradley Allen Clayton, M.D., Lexington, SC  
Valerie Ann Clemons, M.D., Spruce Head, ME  
Kellee Rae Clougherty, M.D., Ojai, CA  
Jerry Padpad Co, M.D., Jacksonville, FL  
Cristinel Mircea Coconcea, M.D., Belmont, MA  
Nicoleta Coconcea, M.D., Belmont, MA  
Craig Jeffrey Coenson, M.D., New Orleans, LA

Joshua C. Cohen, D.O., Bellingham, WA  
Mary Eleen Cohen, M.D., Pensacola, FL  
Tracy L. Collins, M.D., Scottsdale, AZ  
Marilyn Eileen Conlon, M.D., Ph.D., Traverse City, MI  
Hilary Smith Connery, M.D., Ph.D., Belmont, MA  
Paula Constantinescu, M.D., Brooklyn, NY  
Vladimir Coric, M.D., Madison, CT  
Matthew Christian Cornelius, M.D., Phoenix, AZ  
Lisa M. Cosgrove, D.O., Tacoma, WA  
Todd Scott Cox, M.D., Washington, DC  
Anthony Cozzolino, M.D., San Jose, CA  
Horia Liviu Craciun, M.D., Solon, OH  
Mary Bridgid Cruser, M.D., San Antonio, TX  
Christine Maria Csatory, M.D., New York, NY  
James Tracy Cullinan, D.O., Mountain Brk, AL  
Kristina Marie Curci, M.D., Blawnox, PA  
Mircea Custura, M.D., Bronx, NY  
Rana Fouad Dagher, M.D., Bangor, ME  
Melita Lori Daley, M.D., Beverly Hills, CA  
Hemlata Chintaman Dalvi, M.D., Long Island City, NY  
Katherine Ann Daly, M.D., Wayzata, MN  
Mariana Danet, M.D., Weston, FL  
Bezalel Dantz, M.D., Chicago, IL  
Kay McManus Dantzler, M.D., Birmingham, AL  
Margaret Rowley Davis, M.D., Denver, CO  
Diana Patricia De La Vega, M.D., Miami, FL  
Cynthia Llamas De Los Santos, M.D., Jamaica, NY  
Simona Cornelia Deaciuc, M.D., San Diego, CA  
Nancy Willene Deackoff, M.D., South Windsor, CT  
Alain Erich Enciso DeCastro, M.D., Wheaton, IL  
Donna Besier DeFelice, M.D., Scottsdale, AZ  
John Mgrditch Deirmenjian, M.D., Long Beach, CA  
Julio Bernardo Delgado, M.D., Gainesville, FL  
Christina Maria Demopoulos, M.D., Mercer Island, WA  
Carla A. Denham, M.D., Chandler, AZ  
Christopher Robert Dennis, M.D., New York, NY  
Christine Elaine Desmond, M.D., Cheshire, CT  
Jane McNab DeVeau, M.D., Raleigh, NC  
Maya Devi, M.D., Lexington, KY  
Charles Durwood Devine, M.D., Brandon, FL  
Alisa Ann Devlin, M.D., Baltimore, MD  
Josefina A. Diaz-Vogt, M.D., El Paso, TX  
Savtanter Singh Dillon, M.D., Falls Church, VA  
Gergana Damianova Dimitrova, M.D., Greer, SC  
Bryan Larry Dirks, M.D., Ewing, NJ  
Elena Dlugach, M.D., Simpsonville, SC  
Bong Doan, M.D., Huntington Beach, CA  
Vy Vinh Doan, M.D., Los Angeles, CA  
Paul Alexander Dobransky, M.D., Chicago, IL  
Zana Dobroshi, M.D., Ph.D., New York, NY  
Elizabeth Therese Dolgos, M.D., Daphne, AL  
Roger Alan Donovan, M.D., Los Angeles, CA  
Regina Marie Doody Lundy, M.D., Madison, AL  
Laura Lee Downs, M.D., Floral Park, NY  
Gregory Joseph Dray, M.D., Asheville, NC  
James Darin Drury, M.D., Thomasville, GA  
Elizabeth Ross Dunn, M.D., Belmont, MA  
Neal Dunsieith, M.D., Cincinnati, OH  
Deirdre Ann Dupre, M.D., Chicago, IL

Sinan Duzyurek, M.D., Washington, DC  
Izabella Dyakovetsky, M.D., Richboro, PA  
Robert N. Earle, M.D., Friendswood, TX  
John Charles Echols, M.D., Martinez, CA  
Ali El-Sayed El-Menshawi, M.D., Orlando, FL  
Aaron Anthony Elliott, M.D., New York, NY  
Brian Daniel Espinoza, M.D., Phoenix, AZ  
Hebe Elisa Estrella-Schultz, M.D., Granite Bay, CA  
James William Ethier, M.D., Wenatchee, WA  
Jerry E. Eyeler, M.D., Los Angeles, CA  
Paula Sue Fabrizio, D.O., Merrick, NY  
Sondralyn McCard Fackler, M.D., Macon, GA  
Sharon Falco, M.D., Fair Haven, NJ  
Alexander Hao Fan, M.D., Los Angeles, CA  
Emmanuel J. Fantone, M.D., Fresno, CA  
Michel Farhad Farivar, M.D., Eugene, OR  
Mubashir Ahmad Farooqi, M.D., Highland, CA  
Hassan Salah Farrag, M.D., Northridge, CA  
Caroline Pauig Farrales, M.D., Parsippany, NJ  
Lydia Olympia Fazzio, M.D., New York, NY  
Pamela McAllister Feeley, M.D., Germantown, MD  
Michael Feminella, M.D., New Fairfield, CT  
Jeffrey Alan Feola, M.D., Brooklyn, NY  
Alberto Fernandez Sabater, M.D., Tamarac, FL  
Michael Scott Ferrell, M.D., Boulder, CO  
Molly Finnerty, M.D., New York, NY  
David Joel Fishbein, M.D., Brookline, MA  
Carol Denise Flippen, M.D., Pittsburgh, PA  
Linda Catherine Ford, M.D., Edmonds, WA  
Lisa Marie Foster, M.D., Wyomissing, PA  
Rosanne M. Fox, M.D., Philadelphia, PA  
Pierre Lesly Francois, M.D., Centereach, NY  
Miles McGehee Frank, M.D., Charlottesville, VA  
Linda Kay Frankel, M.D., Albany, CA  
John Thomas Frederick, M.D., Seattle, WA  
Stanley John Fudala, M.D., Beloit, WI  
Geoffrey Matthew Gabriel, M.D., Simpsonville, SC  
Lynne McDonald Gaby, M.D., Arlington, VA  
Laura Rachelle Gaffney, M.D., Baltimore, MD  
Cathryn Ann Galanter, M.D., Brooklyn, NY  
Gerald Timothy Gambrill, M.D., Mission, KS  
Deena Manish Gandhi, M.D., Sugar Land, TX  
Jeffrey Stuart Gandin, M.D., Beverly Hills, CA  
Sara Lou Gandy, M.D., Woodside, CA  
Alex F. Garcia, M.D., Santa Ana, CA  
Gretchen Kay Gardner, M.D., Chardon, OH  
Rashmi Garg, M.D., Redwood City, CA  
Christine Gartner, M.D., Oakland, CA  
Jeffry Travis Gee, M.D., Bluefield, WV  
Karen Elise Glowacki Gennaro, M.D., Purchase, NY  
Julie Patrice Gentile, M.D., Bellbrook, OH  
Lori Baumert Gerding, M.D., Daniel Island, SC  
Lev Grigorievich Gertsik, M.D., S Pasadena, CA  
Nafisa Yunus Ghadiali, M.D. FRCPC., Downers Grove, IL  
Petros Ghermay, M.D., Chowchilla, CA  
Thomas Lee Gillespie, M.D., Pittsburgh, PA  
Robert Bruce Gilman, M.D., Brookline, MA  
Mitchell L. Glaser, M.D., Chicago, IL  
Marie D. Glenn, M.D., Muscle Shoals, AL

Yvette Simon Goldfine, M.D., Somerset, NJ  
Sandra Enilda Gomez Luna, M.D., Stamford, CT  
Jose Manuel Gonzalez, M.D., Coral Gables, FL  
Gerardo Gonzalez-Haddad, M.D., Worcester, MA  
Toni Burnette Goodykoontz, M.D., Bridgeport, WV  
Hirekatur Venkataram Gopinath, M.D., Pitt Meadows, BC  
Maxie Lerone Gordon, M.D., Clinton, MS  
Jill Marie Nasby Gorius, M.D., Minneapolis, MN  
Jeffrey Louis Gould, M.D., San Francisco, CA  
Evan Hayward Goulding, M.D., Ph.D., Evanston, IL  
Jason Graber, M.D., Beverly Hills, CA  
Preetham Grandhi, M.D., White Plains, NY  
Mark David Green, M.D., Littleton, CO  
Karen Sydney Greenberg, M.D., Brookline, MA  
Jaime L. Grodzicki, M.D., New York, NY  
David Mark Gudeman, M.D., Simi Valley, CA  
Madhumathy Gundlapalli, M.D., Alpine, UT  
Nick Martin Gutierrez, M.D., Culver City, CA  
Susan Kathleen Guy, M.D., Ojai, CA  
Robert William Guynn, M.D., Houston, TX  
Ceri Elizabeth Hadda, M.D., New York, NY  
David Yeunsik Hahn, M.D., Cleveland, OH  
Franklin Maxwell Halley, M.D., Yellow Spgs, OH  
Carmen Z. Harlan, M.D., Columbus, OH  
Scott Myers Harman, M.D., Lansdale, PA  
A. Ebrahim Haroon, M.D., Sandy Springs, GA  
Kristina Joan Harrington, M.D., Boise, ID  
Michael Ray Harris, M.D., Louisville, KY  
Patrice Annette Harris, M.D., Stone Mtn, GA  
Paul Wayne Harris, M.D., Milwaukee, WI  
Trudy Ann Hartman, M.D., Palo Alto, CA  
William Ryan Hartman, M.D., Powell, OH  
Tracie Danielle Harvey, M.D., Lakewood, CA  
Fawzia Karim Hasan, M.D., Hockessin, DE  
Syed Mohammad Hashimi, M.D., Windermere, FL  
Larry Todd Hawkins, M.D., Marietta, OH  
Frances Gaines Haxton, M.D., Syracuse, NY  
Novellyn Hitchens Heard, M.D., Covina, CA  
Theodore Alan Henderson, M.D., Ph.D., Centennial, CO  
John Michael Hetteema, M.D., Glen Allen, VA  
Stuart Christopher Hinds, M.D., Los Angeles, CA  
Brenda Peyton Hines, M.D., Flowood, MS  
Robert H. Hines Jr., M.D., Sausalito, CA  
Scott Matthew Hogan, M.D., Little Rock, AR  
Charles W. Hoge, M.D., Bethesda, MD  
Martin Harold Hoines, M.D., Vashon, WA  
Claire Crockett Holderness, M.D., Brooklyn, NY  
Nicholas Anthony Holliday, M.D., Stockbridge, MA  
Jasper Cory Hollingsworth, M.D., Petaluma, CA  
Julie Ann Holman, M.D., Elizabethtown, KY  
Robert Marc Homer, M.D., Boca Raton, FL  
Wendy Joy Hookman, M.D., Rockville, MD  
Christian Jean Hopfer, M.D., Aurora, CO  
Asghar S.M. Hossain, M.D., Paramus, NJ  
Susan Theresa Howard, M.D., Hastings, NE  
Michelle Phillips Hubner, M.D., Tulsa, OK  
Dennis Michael Hughes, M.D., Scottsdale, AZ  
Zulima Consuelo Hurtado, M.D., Mt Prospect, IL  
Seema Hussain, M.D., Calgary, AB

Moses Sujad Ijaz, D.O., Columbus, OH  
Raju V. Indukuri, M.D., Brentwood, TN  
Dan Vlad Iosifescu, M.D., New York, NY  
Nayyar Iqbal, M.D., Hopkinsville, KY  
Samir Gamal Shaker Ishak, M.D., Fort Wayne, IN  
Saleem Ishaque, M.D., National City, CA  
Anna Ivanenko, M.D., Kenilworth, IL  
Zeljko M. Ivanovic, M.D., Birmingham, AL  
Karl Monte Jacobs, M.D., San Diego, CA  
Nina Sarah Jacobs, M.D., Enfield, CT  
Walter Eric Jacobson, M.D., Agoura Hills, CA  
Alan Donald Jacovich, D.O., San Diego, CA  
Catherine Ann Jakubowitch, M.D., North Yarmouth, ME  
Joanna Maria Jakubowska, M.D., Cheshire, CT  
Mary Lou Jazwinski, D.O., Meadowbrook, PA  
Jeffrey Jan Jenkins, M.D., Springfield, MO  
Charles Scott Jennisch, M.D., Urbandale, IA  
Dexter Anthony Jensen, M.D., San Diego, CA  
Tina Aram Jin, M.D., Falls Church, VA  
Joshi Abraham John, M.D., Jericho, NY  
Vineeth Philip John, M.D., Houston, TX  
Thomas Bradford Johns, M.D., Norcross, GA  
John Arunapurathu Johnson, M.D., New Albany, OH  
Jeffrey Vincent Jones, M.D., Collierville, TN  
Kristina Leslie Jones, M.D., New York, NY  
Harold Richard Jordan, M.D., Northampton, MA  
Michael Wayne Jordan, M.D., Tempe, AZ  
Sofya Kagan, M.D., Richmond Hill, NY  
Oludolapo Oluseun Kale, M.D., Laurel, MD  
Anupama Sherrie Kalsi, M.D., Woodland Hills, CA  
Raymond Wai Kam, M.D., Cambridge, MA  
Desmond Marc Kaplan, M.D., Timonium, MD  
Vinay Kapoor, M.D., Houston, TX  
Harish Cheruvattath Kavirajan, M.D., Costa Mesa, CA  
Bush Kavuru, M.D., Roanoke, VA  
Alamdar Hussain Kazmi, M.D., Ottawa Hills, OH  
William James Kearney, M.D., Louisville, KY  
George Alan Keepers, M.D., Portland, OR  
Sondra Keller, M.D., Charleston, SC  
Patricia L. Kelly, M.D., Albuquerque, NM  
William Samuel Kelly, M.D., Seattle, WA  
Heather Anne Kennedy, M.D., Wilmington, DE  
Richard Ellis Kennedy, M.D., Trussville, AL  
Edward Thomas Kenny, M.D., New York, NY  
Jonathan Michael Kersun, M.D., Swarthmore, PA  
Khaled Abdelghany Khalafallah, M.D., Olney, MD  
Aftab Mohammad Khan, M.D., Hummelstown, PA  
Anita Khanna-Caulson, M.D., Denver, CO  
Lasha Khetsuriani, M.D., Bronx, NY  
Mitchell Robert C. Kho, M.D., Blue Bell, PA  
Shafiq Rehman Khokhar, M.D., Ozone Park, NY  
Eric John Khoury, M.D., Napa, CA  
Kevin William Kilimann, M.D., Colorado Spgs, CO  
Charles Choonsik Kim, M.D., Woodcliff Lake, NJ  
Timothy Cooper King, M.D., Winston Salem, NC  
Janet Susan Kirby, M.D., Evanston, IL  
Eric Lee Kirchmann, M.D., Raleigh, NC  
Marianna L. Kiselev, M.D., Marlboro, NJ  
Joseph Anthony Kithas, M.D., Las Vegas, NV

Hilary Manette Klein, M.D., Westport, CT  
Erin Lynn Klekot, M.D., Warren, OH  
Andrew Henry Klompus, M.D., San Francisco, CA  
Walter Knysz III, M.D., Bloomfield Hills, MI  
Daniel Aaron Kodner, M.D., Seattle, WA  
Kelan Richard Koenig, M.D., Bellevue, WA  
Smadar Kometz-Rock, M.D., Woodbridge, CT  
Maya Koopman, M.D., Bellingham, WA  
Yelena Koss, M.D., Burlingame, CA  
Anna Barbara Kosturek, M.D., New Castle, PA  
John George Koutras, M.D., Williston, VT  
Christopher John Kowalsky, M.D., Silver Spring, MD  
Chad Yukio Koyanagi, M.D., Aiea, HI  
Alexander Kozlovsky, M.D., Lynn, MA  
Andreas Konrad Kraebber, M.D., New York, NY  
Brian Dennis Krause, M.D., Front Royal, VA  
Gollavelli Jyothi Krishna, M.D., Staten Island, NY  
Steven Michael Kubas, M.D., Austin, MN  
Manjari Kumar, M.D., Oak Brook, IL  
Camille Aimee LaCroix, M.D., Boise, ID  
Jennifer Sue Lahmann, M.D., La Crosse, WI  
Christopher Alfonso Lamps, M.D., Midlothian, VA  
Sandra Lare, D.O., Wilmington, NC  
Stuart Wayne Larson, M.D., Danville, KY  
Robert Alfonso Lasser, M.D., Pineville, PA  
Mukesh Lathia, M.D., Saginaw, MI  
Andrew Sarmiento Lauronilla, M.D., Wichita, KS  
Laura Mae Leard-Hansson, M.D., San Diego, CA  
Julie L. Leavitt, M.D., San Francisco, CA  
Allison C. Lee, M.D., Granite Bay, CA  
Elbert Chulho Lee, M.D., Charleston, IL  
Matthias Ky-Suh Lee, M.D., Mercer Island, WA  
Richard Joonkoo Lee, M.D., Moreno Valley, CA  
Steven Joseph Lee, M.D., New York, NY  
Nancy Carolyn Lehman, M.D., Asheville, NC  
David William Leicken Jr., M.D., Scottsdale, AZ  
Andrew E. Leifer, M.D., Evergreen, CO  
Keri Lee Lemmond, M.D., Hollis, NH  
Peter Leong, M.D., Washington, DC  
Darin Merrill Lerner, M.D., Baltimore, MD  
Robin Cheryl Lessoff, M.D., Burlington, VT  
Leonard Lev, M.D., Glastonbury, CT  
Naomi Adina Levy, M.D., River Forest, IL  
Julie Elizabeth Lewerenz, M.D., Califon, NJ  
John Anthony Liberto, M.D., Biloxi, MS  
Oleg D. Lifyandsky, M.D., Studio City, CA  
Barbara Lilli Ponieman, M.D., Albertson, NY  
Helen Hwei Ling Lin, M.D., Chicago, IL  
Cheri Yost Lindberg, M.D., Chevy Chase, MD  
Richard Edmund Lipon, M.D., Sacramento, CA  
Lauri Ann Liskin, M.D., New York, NY  
Caroline Ann Loeb, M.D., Chicago, IL  
Kelly Jon Loomis, D.O., San Diego, CA  
Steven Gerald Lopez, M.D., Daniel Island, SC  
Heidi Frances Lopez-Coonjohn, M.D., Douglas, AK  
Linda Jane Lotspeich, M.D., Palo Alto, CA  
Amy Dusza Lott, M.D., Birmingham, AL  
Shao-Hua Lu, M.D., Vancouver, BC  
Richard Jewell Lunsford, M.D., Hopkinsville, KY



Ellen Akemi Machikawa, M.D., Monterey Park, CA  
Kevin Allen Mack, M.D., San Francisco, CA  
Christine Elise MacMillan, M.D., M.P.H., New York, NY  
Sudhakumar Madapoosi, M.D., York, PA  
Thomas Michael Magnuson, M.D., Omaha, NE  
Kelley Anne Mahar, M.D., Marquette, MI  
Ajay Kumar Makhija, M.D., McLean, VA  
Rajeev Malhotra, M.D., Naperville, IL  
Susan Roach Mallory, M.D., Atlanta, GA  
Seth Arlan Mandel, M.D., Manhasset, NY  
Mark Edward Manley, M.D., Saint George, UT  
James Edward Manning IV, M.D., Wellsboro, PA  
Yasin Mansoor, M.D., Union City, CA  
Abir Assaad Marcus, M.D., Port Monmouth, NJ  
Scott David Marder, M.D., New York, NY  
Mazen Hanna Maria, M.D., Valhalla, NY  
Alan Markie, M.D., La Canada, CA  
David Morris Marks, M.D., Chapel Hill, NC  
Tracey Irvin Marks, M.D., Atlanta, GA  
Ellen M. Markus, M.D., Chicago, IL  
Rosa Martinez-Casuso, M.D., Coral Gables, FL  
Brian Martis, M.D., Dexter, MI  
Lee Jonathan Marven, M.D., Las Vegas, NV  
Maria Bernadette Mathias, M.D., Centerville, OH  
Elena Milaneschi Matthews, M.D., Raleigh, NC  
Paul Arthur Mattox, M.D., Durango, CO  
Teresa Veta Mayer, M.D., Superior, CO  
Michelle Christine McCall, M.D., Helena, MT  
Catherine Lapp McCarthy, M.D., Arlington, VA  
Robert John McDaniel, M.D., Indianapolis, IN  
Patricia Mourilhe McEntire, M.D., McLean, VA  
Ronald D. McFadden, M.D., Jackson Ctr, PA  
Tim Whittus McGaughy, M.D., Ph.D., American Fork, UT  
Pauline Frances McHugh, M.D., New York, NY  
Clyde McLane III, M.D., Birmingham, AL  
Michael Darryl McLeod, M.D., Atlanta, GA  
Lisa Anne McMurray, M.D., Gatineau, QC  
Susan McNamara, M.D., Middlefield, CT  
Ritula Bhutani Mehndiratta, M.D., Potomac, MD  
Sejal Saumil Mehta, M.D., Plano, TX  
Umesh Suryaprasad Mehta, M.D., Edison, NJ  
Marissa Mariano Mejia, M.D., Pasadena, CA  
Vanessa Maria Mejias-Hirald, M.D., White Plains, NY  
Susan Jane Gebhardt Meland, M.D., Alexandria, MN  
Kristen Ann Melnyk, M.D., Los Angeles, CA  
Samantha Erika Meltzer-Brody, M.D., M.P.H., Chapel Hill, NC  
Matilda M. Mengis, M.D., Portland, OR  
Gary Stott Merrill, D.O., Niskayuna, NY  
Kimberly T. Meyer, M.D., Chicago, IL  
Irina Y. Mezhebovsky, M.D., Needham Hgts, MA  
Alexander Paul Miano, M.D., Bloomfield, CT  
Anthony Clark Miller, M.D., Iowa City, IA  
Carol Jeane Miller, M.D., Simpsonville, KY  
Edward Alan Minor, M.D., Columbus, GA  
Lisa Ann Mistler, M.D., Worcester, MA  
John Burbank Mitchell, M.D., Kingston, NY  
Peeyush Mittal, M.D., Niskayuna, NY  
Ahmed Sherif Saad Galal Mohamed Abdel Meguid, MBChB,  
Glen Allen, VA

Despina Moise, M.D., Logansport, IN  
George Molemo Monese, M.D., Greenville, WI  
David Michael Montani, M.D., Alton, IL  
Scott Arthur Monteith, M.D., Traverse City, MI  
Michelle Elizabeth Montemayor, M.D., Ph.D., New York, NY  
Katherine Marshall Moore, M.D., Rochester, MN  
Pamela Jean Moore, M.D., Wethersfield, CT  
Carlos Mora, M.D., Montclair, NJ  
Michael Joseph Morejon, M.D., Boca Raton, FL  
Maria Raphael Moreno Heather, M.D., Saint Clairsville, OH  
James Joseph Morris, M.D., Columbus, GA  
Christine Yu Moutier, M.D., San Diego, CA  
Vincent Jude Mullen II, M.D., Lexington, KY  
Mrinal Mullick, M.D., Bowling Green, KY  
Linda Gail Munson, D.O., M.S., Westville, IN  
Mohamado Sahidu Musthaq, M.D., Plymouth Meeting, PA  
Melissa Ann Myers, M.D., Conway, NH  
Robert C. Nagel, M.D., Ossining, NY  
Latha T. Nair, M.D., Overland Park, KS  
Sreekumar P. Nair, M.D., Overland Park, KS  
Sudha Radha Narayanan Nair, M.D., Wyndmoor, PA  
Dwayne Avani Narayan, M.D., Frederick, MD  
Erika Ann Nathan, M.D., Beachwood, OH  
Shujaat Ali Nathani, M.D., Huntingdon, PA  
Mehboob Ali Nazarani, M.D., Houston, TX  
Adriana Denisa Neagoe, M.D., Framingham, MA  
Marc Lee Nehorayan, M.D., Van Nuys, CA  
Haleh Nekooraad-Long, M.D., Longmont, CO  
Jay Lawrence Newman, M.D., Pikesville, MD  
Robert Mark Newman, M.D., Cincinnati, OH  
Noreen Marla Newmark, M.D., Chula Vista, CA  
Lil Khue-Luong Nguyen, M.D., Palo Alto, CA  
Jeffrey Scott Nicholl, M.D., New Orleans, LA  
Fadi Joseph Nicolas, M.D., San Diego, CA  
Alla Nirenberg, M.D., Briarcliff Manor, NY  
Ngozi Patricia Nnadi, M.D., Charleston, SC  
Randolph Harvey Noble, M.D., Encino, CA  
Roberto Norniella Vera, M.D., Columbus, GA  
Edward Robert Norris, M.D., Allentown, PA  
Visnja Novacki, M.D., Great Falls, VA  
Michelle Ann Nuss, M.D., Athens, GA  
Okechukwu Nkem Nwangburuka, M.D., Elk Grove, CA  
Susan McAnelly O'Connor, M.D., Nashville, TN  
Donal Thomas O'Hanlon, M.D., Dorchester, MA  
Frances Elizabeth O'Sullivan, M.D., Oxnard, CA  
Gabriela Valeria Obrocea, M.D., Ph.D., Bakersfield, CA  
Richard Alldin Oddy, M.D., MBChB, Fort Collins, CO  
Ikechukwu Anele Ohiaeri, M.D., Victorville, CA  
Telva Eleida Olivares, M.D., Pittsford, NY  
Milagros Delcarmen Olivieri-Lorenzo, M.D., Clearwater, FL  
David P. Olson, M.D., Ph.D., Belmont, MA  
Kristin Lee Olson, M.D., Bennett, CO  
Kurt Andrew Olson, M.D., J.D., Albuquerque, NM  
Geraldine C. M. Orendain, M.D., Huntington, NY  
Eugene S. Ortiz, M.D., Pittsburgh, PA  
Owen Osamogie Osagie, M.D., Sugar Land, TX  
Olga Osokina, M.D., Sharon, MA  
David D. Ott, M.D., New York, NY  
Derek Alan Ott, M.D., Los Angeles, CA

James Randall Owen, M.D., Lake Bluff, IL  
Soyna Owley, M.D., Rye, NY  
Thomas Brian Owley, M.D., Napa, CA  
Resul Kaan Ozbayrak, M.D., West Brookfield, MA  
Stephanie Elaine Page, M.D., Catawba, VA  
Geetha Kommineni Paladugu, M.D., Redlands, CA  
Christopher Michael Palmer, M.D., Lexington, MA  
Suvasini A. Pandit, M.D., Mansfield, MA  
Kristine Panik, M.D., Berkeley, CA  
Anil Kumar Parekh, M.D., Somerset, PA  
Manish Parikh, M.D., Ashland, KY  
Brian Park, M.D., Wallkill, NY  
Jennifer Meesook Park, M.D., San Diego, CA  
Lawrence Taeseng Park, M.D., Great Falls, VA  
Vivien Mary Parker, M.D., Toronto, ON  
Alpa Ashok Patel, M.D., Northridge, CA  
Dhiren B. Patel, D.O., Dallas, TX  
Shailesh Chandubhai Patel, M.D., Bakersfield, CA  
Sugnaykumar P. Patel, M.D., Fresno, CA  
Vijaya Lakshmi Pavuluri, M.D., Brentwood, TN  
Beverly Ann Pazur, M.D., New York, NY  
Kimberly Hope Pearson, M.D., Newtonville, MA  
Roger Peele, M.D., Rockville, MD  
Giovanna Pegolo, M.D., Pasadena, CA  
Jennifer Kern Pennell, M.D., Apex, NC  
Joyce Z. Pere, M.D., Greenwich, CT  
Edward Belk Perry Jr., M.D., North Haven, CT  
Pamela Diane Perry-Hunter, M.D., Los Angeles, CA  
Robert James Perzacki, M.D., Willmar, MN  
Gregory Nels Peterson, M.D., West Hartford, CT  
George L. Petzinger, M.D., Selah, WA  
Tony Ai Pham, M.D., Ph.D., Houston, TX  
Joseph M. Pierre, M.D., Los Angeles, CA  
Aron Pinkhasov, M.D., Albertson, NY  
Moise Leslie Plantin, M.D., Westbury, NY  
Christine C. Pletkova, M.D., Tucson, AZ  
Tatianna Polonsky, M.D., New York, NY  
Daniel Seth Polster, M.D., Parma, OH  
Michael Allen Posternak, M.D., Wellesley, MA  
Steven Dale Prakken, M.D., Chapel Hill, NC  
Aneta Predanic, M.D., Plano, TX  
Benet Ray Press, M.D., Glendale, AZ  
Joshua Emanuel Pretsky, M.D., Los Angeles, CA  
Charles Sowle Price, M.D., Reno, NV  
Monica Haller Proctor, M.D., Brecksville, OH  
Austin Vincent Puglisi, M.D., Benson, AZ  
David Charles Purselle, M.D., Atlanta, GA  
Celia Sison Purugganan, M.D., New York, NY  
Yifang Qian, M.D., Ph.D., San Francisco, CA  
Elizabeth Ann Quattrocki, M.D., Ph.D., Belmont, MA  
John Querques, M.D., Cambridge, MA  
Brenda Sau Kit Quon, M.D., La Canada Flintridge, CA  
Leora Ann Rabin, M.D., Yarmouth, ME  
Branko Radulovacki, M.D., Atlanta, GA  
Roueen Rafeyan, M.D., Wilmette, IL  
Eric Brendan Raimo, M.D., San Diego, CA  
Rajendra Thekkeurumbil Raman, M.D., Knoxville, TN  
Vani Arakeri Rao, M.D., Severn, MD  
Kathryn Porter Rapperport, M.D., Lexington, MA

Abdul Rauf, M.D., Brownstown, MI  
Sajid Ahmed Ravasia, M.D., CCFP, FRCPC, Spokane, WA  
Lee Andrew Rawitscher, M.D., San Francisco, CA  
Mary Elizabeth Read, M.D., Torrance, CA  
Achutha Nagireddy Reddy, M.D., Wichita, KS  
Giridhar Gopal Reddy, M.D., Oakland, CA  
Nallu Hemalatha Reddy, M.D., Leawood, KS  
Srinivasa Reddy Reddy, M.D., Columbia, SC  
James John Reeves, M.D., Norfolk, VA  
Lydia Reich, M.D., Houston, TX  
Barbara Gazzo Reisman, M.D., Napa, CA  
Anthony P. Ret, M.D., Union City, CA  
David Charles Rettew, M.D., Burlington, VT  
Christopher Blaine Reyburn, M.D., Ketchum, ID  
Erika Lynn Reynolds, M.D., Carlsbad, CA  
Nestor D. Riel, M.D., Tracy, CA  
Julia Ann Ritter-Welzant, M.D., Baldwin, MD  
Edmundo Ismael Rivera, M.D., Winter Spgs, FL  
Syed Wasi Hyder Rizvi, M.D., Forest Hill, MD  
Holly Roberts, M.D., Pelham, NY  
Wendy Mann Roberts, M.D., Los Angeles, CA  
Michael John Robinson, M.D., Carmel, IN  
Robyn Cecelia Robinson, M.D., Ithaca, NY  
Shannon Kay Robinson, M.D., San Diego, CA  
Timothy Francis Rockcross, M.D., Bangor, ME  
Roman Rodriguez, M.D., San Francisco, CA  
Everett Joaquin Rogers, M.D., Tucson, AZ  
Veronica Maria Rojas, M.D., Ridgewood, NJ  
Carmen Roman, M.D., Menlo Park, CA  
Isabel Casillas Rosales, M.D., Aloha, OR  
Oscar Valdez Rosas, M.D. M.P.H., La Canada, CA  
Lane Gruber Rose, M.D., Little Silver, NJ  
Paul Jacoby Rosenfield, M.D., Bronx, NY  
Thomas Joseph Rosko, M.D., Playa Vista, CA  
Lisa Sue Rosof, M.D., Atlanta, GA  
Jerryl Lynn Rubin, M.D., Arcata, CA  
Indre Rukseniene, M.D., Cincinnati, OH  
Peter Clifton Saavedra, D.O., Presto, PA  
Simi Sachdev, M.D., Florence, SC  
Thomas Hewitt Sachy, M.D., M.S., Gray, GA  
Hasnain J. Sadiq, M.D., Omaha, NE  
Ariadna Sadziene-Bessinger, M.D., Ph.D., Farmington, NM  
Javier Salabarría, M.D., Wallingford, CT  
Sheryl L. Salaris, M.D., Saint Louis, MO  
Christie Lynn Sams, M.D., Roslindale, MA  
Louis Chris Sanfilippo, M.D., Orange, CT  
John Michael Santopietro, M.D., Bolton, CT  
Manuel Patrick Santos, M.D., Garden City, NY  
Czarina Santos-Borja, M.D., Perry Hall, MD  
Ruth Annette Schack, M.D., Newport Coast, CA  
Alexander Michael Scharko, M.D., Madison, WI  
Lizann Schloff, M.D., Falls Church, VA  
John Michael Schmitz, M.D., Saint Cloud, MN  
Amy Elizabeth Schuett, M.D., Billings, MT  
Jeffrey David Schulden, M.D., Bowie, MD  
Mona Lisa A. Schulz, M.D., Ph.D., Yarmouth, ME  
Ann Catherine Schwartz, M.D., Tucker, GA  
Daniel Carl Scott, M.D., Willmar, MN  
Anca Seger, M.D., Rochester, NY

Jeffrey Douglas Seley, M.D., Reading, PA  
Simrat Singh Sethi, M.D., Salem, OR  
Conrado Castrillo Sevilla, M.D., Bakersfield, CA  
Robert Lyman Sexton, M.D., Spokane, WA  
Alpa Chandrakant Shah, M.D., Marshfield, WI  
Komal Saurabh Shah, M.D., East Brunswick, NJ  
Vikram Navinchandra Shah, M.D., Ellicott City, MD  
Tasneem Shaikh, M.D., Hillsborough, NJ  
Joseph C. Shanklin, M.D., Clearwater, FL  
Nathan Andrew Shapira, M.D., Ph.D., Atlanta, GA  
Ashima Sharma, M.D., Calabasas, CA  
Jess Parker Shatkin, M.D., M.P.H., New York, NY  
Johanna Shaw, M.D., Nantucket, MA  
William Patrick Sheehan, M.D., Willmar, MN  
Leonid Shegelman, M.D., Brooklyn, NY  
Sharon L.S. Shepard, M.D., Lancaster, MA  
Nathan Dale Shiflett, D.O., Chillicothe, OH  
Yu Cho Shih, M.D., Lexington, KY  
Seong Sool Shim, M.D., Beachwood, OH  
Mabbu Gajapathy Shivaprasad, M.D., Bellefontaine, OH  
Tatyana P. Shteinlukht, M.D., Ph.D., Worcester, MA  
Lina Elie Shuhaibar, M.D., West Covina, CA  
Claudia Therese Sickinger, M.D., New Canaan, CT  
Fazila Siddiqi, M.D., McKinney, TX  
Asif M. Siddiqui, M.D., Austin, TX  
Steven Joseph Siegel, M.D., Ph.D., Berwyn, PA  
Susan Lynn Siegfried, M.D., Perry, UT  
Judith Ann Sigmund, M.D., Marblehead, MA  
Timothy Carroll Sinclair, M.D., San Francisco, CA  
Steven C. Sinderman, M.D., Hummelstown, PA  
Steven Singer, M.D., Fitchburg, WI  
Haramandeep Singh, M.D., San Ramon, CA  
Santokh Singh, M.D., Montreal, QC  
Simran Bindu Singh, M.D., San Jose, CA  
Shobha B. Sinha, M.D., Burr Ridge, IL  
Apolonia Sinu, M.D., Sewickley, PA  
Lorraine Elizabeth Skach, M.D., Keizer, OR  
Brad Edward Reed Smith, M.D., Madison, WI  
Marilyn Kay Smith, M.D., Denver, CO  
Michael William Smith, M.D., Stockton, CA  
Randy Alan Smith, M.D., Denver, CO  
Scott Brian Smolar, D.O., San Francisco, CA  
Linda F. Smothers, M.D., Lenox, MA  
Sandeep Sobti, M.D., Sanbornville, NH  
Arthur A. Sochacki, M.D., Amelia, OH  
William Eric Sohr, M.D., Morro Bay, CA  
Gregory George Sokolov, M.D., Davis, CA  
Abdelrhman Soliman, M.D., Mason, OH  
Olanrewaju Olayinka Somorin, M.D., Monroe, NY  
Susan Kay Songer, M.D., West Chester, OH  
Olga Bienvenida Soto-Moise, M.D., Bridgewater, NJ  
Lacramioara Spetie, M.D., Powell, OH  
Jeremy Ashley Spiegel, M.D., Falmouth, ME  
Kelly Lynn Sprout, M.D., New London, OH  
Julie Stancliff, D.O., Fallston, MD  
Martin McLeod Steed, M.D., San Luis Obispo, CA  
Barry Stanley Stein, M.D., San Francisco, CA  
Patrick John Stein, M.D., Clarence Ctr, NY  
Martin Irwin Steinberg, M.D., Owings Mills, MD

Christine Kohler Steinhagen, M.D., Virginia Beach, VA  
Christine D. Sterkel, M.D., Chicago, IL  
Geoffrey Feher Sternlieb, M.D., San Diego, CA  
Judith Stevens, M.D., Los Altos, CA  
Suzanne Marie Stewart, M.D., Palmetto Bay, FL  
Phyleen Stewart-Ramage, M.D., Nashville, TN  
Dana Dee Stiles, M.D., Summerfield, NC  
Mitchell P. Stokes, M.D., Newton, MA  
Stephen Michael Stolzberg, M.D., Portland, OR  
Eric James Straumanis, M.D., Loveland, CO  
David William Stroom, M.D., Solon, OH  
David Lee Struble, M.D., Memphis, TN  
Mark Jay Stumacher, M.D., Ridgefield, CT  
Raina Theresa Sullivan, M.D., Mableton, GA  
Daniel Sussman, M.D., Las Vegas, NV  
Vanna Rae Sutherland, M.D., San Mateo, CA  
Travis K. Svensson, M.D., Ph.D., San Francisco, CA  
Martin B. Switzky, M.D., Radnor, PA  
Marwan Shafic Tabbara, M.D., Portage, MI  
Emad G. Tadros, M.D., San Diego, CA  
Amal Bolis Tanagho, M.D., Fountain Valley, CA  
Sheila Nadine Tano, M.D., Dublin, OH  
Janeta Fong Tansey, M.D., Ph.D., Iowa City, IA  
Jodi Tate, M.D., Iowa City, IA  
Warren D. Taylor, M.D., Cary, NC  
Brian Lee Tesar, M.D., Providence, RI  
Lynn Cofer Thomas, M.D., Little Rock, AR  
Sara Sam Thomas, M.D., Freehold, NJ  
Stephanie Gail Thomas, M.D., Sullivans Island, SC  
Paul Burdette Tilyou, M.D., Prescott, AZ  
Fughik Julius Tirumalasetti, M.D., Williamsburg, VA  
Agnes Teresa Tolentino, M.D., Lakeland, FL  
Razvan Stelu Tornea, M.D., Huntingdon VY, PA  
Carol Lynn Trippitelli, M.D., Washington, DC  
Cristina Andreea Trutia, M.D., Plattsburgh, NY  
Lulu Sim Tsai, M.D., Redmond, OR  
Gabriel Kazuo Tsuboyama, M.D., New Rochelle, NY  
Robertson Buell Tucker, M.D., Philadelphia, PA  
Laura Tuttle, M.D., McLean, VA  
Craig Steven Tutton, M.D., Fort Worth, TX  
Kristen Tyszkowski, M.D., Celebration, FL  
Sonia Nikolaeva Tyutyulkova, M.D., Baltimore, MD  
Khushro B. Unwalla, M.D., Highland, CA  
Ajaya Kumar Upadhyaya, M.D., Bishop's Stortford, Herts  
Edward Valkov, M.D., Denver, CO  
Christopher R. Van Horn, D.O., Leawood, KS  
Vidyasagar Reddy Vangala, M.D., Davenport, FL  
Smita Upkar Varshney, M.D., Rome, GA  
Ekaterina Vassilenko, M.D., Bonita, CA  
Sachinder Vasudeva, M.D., Roanoke, VA  
Sanjay Maniklal Vaswani, M.D., Fullerton, CA  
Kumar Vedantham, M.D., Kensington, CA  
Breda Velasquez, M.D., San Diego, CA  
Roy Pichesver Vellanki, M.D., Wooster, OH  
Panduranga Venkataramana, M.D., Plymouth Meeting, PA  
Belynda Dunn Vesper, M.D., Columbus, NC  
Michael Rene Vicente, M.D., Neenah, WI  
Minerva Villafane-Garcia, M.D., Harrisburg, PA  
Paul Charles Villeneuve, M.D., Johnson City, TN

Cynthia Louise Vitko, M.D., Park City, UT  
Jutta Edith Vogt, M.D., Ardmore, PA  
Rebecca Maclean Wahl, M.D., Killingworth, CT  
Lisa Moran Walker, M.D., Santa Fe, NM  
John Wallace II, M.D., Cary, NC  
Susan Wallace, M.D., Reseda, CA  
Lauren Michelle Walton, M.D., Long Beach, CA  
Po W. Wang, M.D., Palo Alto, CA  
Bhupinder Singh Waraich, M.D., Fremont, CA  
Isidore Simon Ward, M.D., Orange, CA  
Julie A. Warren, M.D., Springfield, MO  
Joseph Soliman Wassef, M.D., Longview, TX  
James Gaier Waxmonsky, M.D., Davie, FL  
Mathilde Sledge Weems, M.D., Albany, CA  
Diana Lynn Weiner, M.D., Concord, NH  
Anthony Peter Weiss, M.D., Arlington, MA  
Sheila Do Carmo Wendler, M.D., Kaneohe, HI  
Claire Louise Wendling, M.D., Hartland, VT  
Robert Joseph Wendling Jr., M.D., Hartland, VT  
Douglas James Whitehart, M.D., Croton On Hudson, NY  
Linda Jean White, M.D., Las Vegas, NV  
Lynn Marie Hietala Wickberg, M.D., Putney, VT  
Nancy Ann Williams, M.D., Iowa City, IA  
Lori Anne Willinghurst, M.D., Albuquerque, NM  
Mark William Wilson, M.D., New York, NY  
Bradly Paul Winkhart, M.D., North Canton, OH  
Leslie Graham Winter, M.D., Aurora, CO  
Aleksandra Henryka Wirga, M.D., Long Beach, CA  
Janet Diane Woolery, M.D., Florence, SC  
Mark Steven Wright, M.D., Lexington, KY  
Eduardo Pelayo Yabut, M.D., Jamestown, ND  
Thomas Weiching Yang, M.D., Sunnyvale, CA  
Albert Sai-Yin Yeung, M.D., Lexington, MA  
Pinar Yilmaz, M.D., Brooklyn, NY  
Karen Pei-Ru Ying, M.D., Fremont, CA  
Jong Yoon, M.D., Berkeley, CA  
Elaine Mayumi Yoshimoto, M.D., San Diego, CA  
Stephen Simon Yost, D.O., Leesburg, GA  
Nancy Younan, M.D., Chevy Chase, MD  
James L. Young, M.D., New Albany, OH  
Paul Christopherson Young, M.D., El Lago, TX  
Michael David Zaitzow, M.D., FRCPC, White Rock, BC  
Gerard M. Zanolli, M.D., Seattle, WA  
Elsa Maria Zayas, M.D., Greenacres, FL  
Darko Zdilar, M.D., Ph.D., Cedar Falls, IA  
Marina Alexandra Zelenko, M.D., Cupertino, CA  
Robert Stephen Zeszotarski, M.D., San Luis Obispo, CA  
Manuela Pascolina Zisu, M.D., New York, NY  
Agnieszka M. Zorniak, M.D., Falls Church, VA

*The following were awarded maintenance of certification in April 2011.*

---

## **Addiction Psychiatry**

---

Adam Mariusz Bisaga, M.D., Hastings Hdsn, NY  
Anthony Thomas Burnett, M.D., Black Mountain, NC  
Charles Chesanow, D.O., Bedford, NH  
Sylvia Jean Dennison, M.D., Deerbrook, WI

I. Marc Galanter, M.D., New York, NY  
Steven Marc Lynn, M.D., Dunwoody, GA  
Jean Allen Melvin, M.D., Charlotte, NC  
Theresa Marie Miskimen, M.D., Millstone Twp, NJ  
David Roger Pating, M.D., San Francisco, CA  
Bradley Mark Pechter, M.D., Evanston, IL  
Laura Leigh Post, M.D., Ph.D., J.D, Barrigada, GU  
Mark Lawrence Prochaska, M.D., Overland Park, KS  
Gayathri Sastry, M.D., Livingston, NJ  
Maria Ann Sullivan, M.D., Ph.D., Bronx, NY  
Stephen Armstrong Wyatt, D.O., Old Lyme, CT  
Jeanne Patricia Yetz, M.D., Jupiter, FL

*The following were awarded maintenance of certification in April 2011.*

---

### **Child and Adolescent Psychiatry**

---

Annah Naomi Abrams, M.D., Belmont, MA  
Ivonne Adriana Acrich, M.D., Hummelstown, PA  
Ava Teresa Albrecht, M.D., New Canaan, CT  
Beverly Elaine Allen, M.D., Spokane, WA  
Cynthia L. Amos-Young, M.D., Arlington, TN  
Cheronne Danette Anderson, M.D., Salt Lake City, UT  
Edward Guisande Arevalo, M.D., San Diego, CA  
Andreea Ingrid Arvinte, M.D., Broomfield, CO  
Jacqueline Elaine Barrett, M.D., Miami Shores, FL  
David Allen Bartholomew, M.D., Chapel Hill, NC  
Caroline Cristine Batenburg, M.D., New Braunfels, TX  
Stephan Fredrick Baum, M.D., Hillsborough, NC  
Alan Nichols Bedell, M.D., Pittsburgh, PA  
Beth Broadwin Belkin, M.D., Ph.D., Scarsdale, NY  
Michael Arthur Bengtson, M.D., Tampa, FL  
Urvashi Bhagat, M.D., Rose Valley, PA  
Lisa Mendel Block, M.D., Baltimore, MD  
Tim Eldon Blumer, D.O., Corvallis, OR  
Julia Preston Bond, M.D., Forest, VA  
Amy Borg-Glickman, M.D., Livingston, NJ  
Neil Walden Boris, M.D., New Orleans, LA  
Melanie Jeanne Brace, M.D., Port Orchard, WA  
Millicent Anne Branch, M.D., Franklin, TN  
Stephanie A. Brandt, M.D., New York, NY  
Eric Todd Breiter, M.D., Morganton, NC  
Kim Leah Bright, M.D., Ellicott City, MD  
Roger Timothy Brown, M.D., Mandeville, LA  
Spencer Alan Brown, M.D., Hummelstown, PA  
John Kemper Burton, M.D., New York, NY  
Regina Kristine Cavanaugh, M.D., Belton, TX  
Gabrielle Maria Cerda, M.D., San Diego, CA  
Claude Leroy Coleman, M.D., Chesapeake, VA  
Mary N. Cook, M.D., Parker, CO  
Sally Ann Cooper, M.D., Rockport, ME  
Paul G. Dagaincourt, M.D., Westwood, MA  
Tushar Madhukar Desai, M.D., San Marcos, TX  
Diane DiGiacomo, M.D., New City, NY  
Carol Ann Dobrzynski, M.D., Toms River, NJ  
Cheryl Connor Dodds, M.D., Columbia, SC  
Laura Lynn Dunn, M.D., Concord, NC



Phyllis Odette Eason, M.D., Stone Mtn, GA  
Shashi K. Elangovan, M.D., Staten Island, NY  
Scott David Feldman, M.D., Evanston, IL  
Christopher Scott Fields, M.D., Mount Pleasant, SC  
Kayla Lyn Fisher, M.D., Memphis, TN  
Adam Loren Fox, M.D., Minneapolis, MN  
Susan Jill Grant, M.D., Shrewsbury, NJ  
Sally Fenton Hahn, M.D., Irvington, NY  
Gabriella Ann Hangiandreou, M.D., Athens, WI  
Toi Blakley Harris, M.D., Missouri City, TX  
Francis Fitzgerald Hayden II, M.D., New Rochelle, NY  
Charles Alfred Henry, M.D., Brookline, MA  
Phillip Hernandez, M.D., Boston, MA  
John Leslie Hertzner, M.D., Shaker Hts, OH  
Patricia Margaret Hoffman-Al-Adsani, M.D., Vail, AZ  
Horacio Boris Hojman, M.D., Mansfield, MA  
Albert Arthur Hyman, M.D., Brookline, MA  
Kyle Patrick Johnson, M.D., Portland, OR  
Steven Noah Kanfer, M.D., Tampa, FL  
Vinay Kapoor, M.D., Houston, TX  
Lisa Karabelnik, M.D., West Hartford, CT  
Helene Maryvonne Keable, M.D., New York, NY  
Joshua Kellman, M.D., Wilmette, IL  
Sarosh Khalid-Khan, M.D., Kingston, ON  
Shahzad Ahmed Khan, M.D., San Diego, CA  
Jack L. Koch Jr., M.D., Nashville, TN  
Janice Lynn Kowalski, M.D., Naperville, IL  
Rajnikant Purshottam Lad, M.D., Mechanicsburg, PA  
Patricia Elizabeth Lester, M.D., Los Angeles, CA  
Wendy Solowey Levine, M.D., Easton, CT  
Marjorie Ellen Levinson, M.D., Montvale, NJ  
Gil Lichtshein, M.D., Boca Raton, FL  
Donna Lynn Londino, M.D., Augusta, GA  
Donna Lou, M.D., Destrehan, LA  
Suzanne Reichle Lucot, M.D., Cranberry Township, PA  
Veena Luthra, M.D., Bryn Mawr, PA  
Anne Bodmer Lutz, M.D., Shrewsbury, MA  
Pradeep Durgacharan Marballi, M.D., Amsterdam, NY  
Cara Lynne McCandless, M.D., Wexford, PA  
Malia Audrey McCarthy, M.D., Davis, CA  
Tamar Meidav, M.D., San Mateo, CA  
Caroline Frances Miner, M.D., Tucson, AZ  
Nicholas Joseph Moffa, M.D., Medford, MA  
Karen Dusseault Monroe, M.D., Medford, MA  
Michael Joseph Morejon, M.D., Boca Raton, FL  
Mark Moss, M.D., Charlottesville, VA  
Mary Ann Murphy, M.D., Columbus, OH  
Sylvia Irene Muzquiz-Drummond, M.D., Houston, TX  
Laurie Lambert Nadal, M.D., Saratoga Spgs, NY  
Rubina Tanzeeb Najeeb, M.D., Huntingtn Bch, CA  
Syed Shujat Ali Naqvi, M.D., Beverly Hills, CA  
Laura Marie Nasatir, M.D., Sacramento, CA  
Chrystyna Nebesh-Jatsyshyn, M.D., Westlake, OH  
Hoang Dao Nguyen, M.D., Fountain Valley, CA  
David Edward O'Connor, M.D., Austin, TX  
Aileen Peralta Oandasan, M.D., Johnstown, PA  
Bernadette Ejiogu Onuoha, M.D., Sugar Land, TX  
Mia Pappagallo, M.D., New York, NY  
James Adam Parker, M.D., Seattle, WA

Rebecca Ann Powers, M.D., Campbell, CA  
Theresa Ann Prescott, D.O., Marlton, NJ  
Jefferson Bruce Prince, M.D., S Hamilton, MA  
Paul Edward Quinlan, D.O., Haslett, MI  
Dale Frederick Radka, M.D., Bristol, RI  
Amaya Enriqueta Ramos, M.D., New Port Richey, FL  
Jyotsna Sreenivas Ranga, M.D., Tucson, AZ  
William George Reiner, M.D., Edmond, OK  
Michelle Lynch Rickerby, M.D., Providence, RI  
Maria Razon Rios, M.D., Silver Spring, MD  
Scott McLaurin Rodgers, M.D., Nashville, TN  
Michelle Ann Sager, M.D., Redding, CA  
Khalil Michel Saliba, M.D., Tulsa, OK  
Michele Lee Sandberg, M.D., Wenatchee, WA  
Jessy Sandoval-Barrett, M.D., Ardmore, PA  
Brett Jay Schneider, M.D., Silver Spring, MD  
Sheryl Marie Schneider, M.D., Louisville, KY  
Caroline Margaret Schon, M.D., Bethesda, MD  
Christopher A. Sinnappan, M.D., Lisle, IL  
Carlos Eduardo Sotolongo, M.D., Pelham, NY  
Sheryl Haass Stefaniak, M.D., Denver, CO  
Gregory Paul Stiener, M.D., Providence, RI  
Allen J. Stuckey, M.D., Elkhart, IN  
Eva Maria Szigethy, M.D., Pittsburgh, PA  
David Salomon Szuster, M.D., Great Neck, NY  
Patricia Maria Tagle-Levy, M.D., Scottsdale, AZ  
Janine Dawson Taylor, M.D., China, ME  
John Francis Theroux, M.D., Kingston, PA  
Matthew Paul Thomas, M.D., Lakewood Ranch, FL  
Veesha Tomashevsky, M.D., New York, NY  
Scott David Uithol, M.D., Kailua, HI  
Madeleine Mendoza Valencerina, M.D., Cerritos, CA  
Meenakshi Vemuri, M.D., East Brookfield, MA  
Daniel Godfrey Vermilion, M.D., Daly City, CA  
Timothy Steven Visscher, M.D., Bozeman, MT  
Victor Mark Wei, M.D., Lima, OH  
Christina Grace Weston, M.D., Spring Valley, OH  
Anna Margarete Williams, M.D., Eugene, OR  
Thomas Shawnodese Wind, D.O., Wallingford, PA  
Katarzyna Ewa Wlodarczyk-Bisaga, M.D., Hastings Hdsn, NY  
DeeAnn Yuk-Han Wong, M.D., San Diego, CA  
Nancy Rumson Yoanidis, M.D., Nashville, TN  
Maurizio Zambenedetti, M.D., Hartsdale, NY

*The following were awarded maintenance of certification in April 2011.*

---

## **Geriatric Psychiatry**

---

Robert C. Abrams, M.D., New York, NY  
Robert Ralph Adams, M.D., Cookeville, TN  
Lawrence Warren Adler, M.D., Glen Burnie, MD  
A. Ari Albala, M.D., San Diego, CA  
Bienvenida Sebastian Austria, M.D., Hollis, NY  
Richard D. Baldwin, M.D., San Francisco, CA  
Mohammed Abdul Bari, M.D., National City, CA  
Stephen James Bartels, M.D., Hanover, NH  
Imtiaz Siraj Basrai, M.D., Diamond Bar, CA

Alan Lee Berkowitz, M.D., San Diego, CA  
Subhash Chander Bhatia, M.D., Omaha, NE  
Karen Blank, M.D., Hartford, CT  
Henry R. Bleier, M.D., Villanova, PA  
Anthony Andrew Bottone, M.D., Bellevue, WA  
Harold E. Bronheim, M.D., New York, NY  
William Joseph Burke, M.D., Omaha, NE  
David A. Casey, M.D., Louisville, KY  
Jaeok Cha, M.D., Columbus, NJ  
James Ching-Yung Chou, M.D., Irvington, NY  
Howard Mark Cohen, M.D., Dallas, TX  
Rona Spector Cohen, M.D., Feasterville, PA  
Catherine J. Datto, M.D., Glen Mills, PA  
Charles Samuel DeJohn, M.D., Ph.D., Houston, TX  
Dorcas Jean Dobie, M.D., Sammamish, WA  
Seshagiri R. Doddi, M.D., Hastings On Hudson, NY  
Robert K. Dolgoff, M.D., Berkeley, CA  
Ahmed D. Faheem, M.D., Daniels, WV  
Sanford I. Finkel, M.D., Wilmette, IL  
Patrick Joseph Fitzsimmons, M.D., Los Gatos, CA  
William A. Florio Jr., M.D., Forest Hills, NY  
Eduardo Garcia-Ferrer, M.D., Saint Louis, MO  
Pawan K. Garg, M.D., Wyandotte, MI  
Baljit Singh Gill, M.D., Yorktown, VA  
Kenneth Jay Gold, M.D., Port St Lucie, FL  
Asher Raphael Gorelik, M.D., Seminole, FL  
Marc D. Graff, M.D., Porter Ranch, CA  
Robert P. Granacher Jr., M.D., Lexington, KY  
Robert Michael Greenberg, M.D., Springfield, NJ  
Blaine Stuart Greenwald, M.D., Larchmont, NY  
Michael D. Gribetz, M.D., Salisbury, NC  
Phillip Michael Grob, M.D., Cazadero, CA  
George Thomas Grossberg, M.D., Saint Louis, MO  
Sanjay Gupta, M.D., Williamsville, NY  
Jung H. Hahn, M.D., Staten Island, NY  
John R. Halderman, M.D., Wilmette, IL  
Scott David Haltzman, M.D., Woonsocket, RI  
Ira Scott Handler, M.D., Butler, PA  
Mohammad K. Hasan, M.D., Beckley, WV  
Peter John Hauber, M.D., Cheswick, PA  
Donald Edwin Hauser, M.D., Bellaire, TX  
Randolph Heinrich Hemsath, M.D., St Petersburg, FL  
Allen Lee Hueston, M.D., Mc Gregor, TX  
Venkata Ramana Jasty, M.D., West Bloomfield, MI  
Sheila Gay Jowsey, M.D., Rochester, MN  
Balkrishna Kalayam, M.D., White Plains, NY  
Douglas Alan Kalunian, M.D., Tacoma, WA  
Charles Horn Kellner, M.D., New York, NY  
James Joseph Kennedy, M.D., Knoxville, TN  
Paul Andrew Kettl, M.D., Philadelphia, PA  
Kathleen Mekyung Kim, M.D., M.P.H., San Diego, CA  
Stephen S. Klevens, M.D., Sherman Oaks, CA  
Sibel Klimstra, M.D., White Plains, NY  
Felix Erich Kral, M.D., Califon, NJ  
Steven David Kronick, M.D., Albany, NY  
Richard Alan Krugley, M.D., Woodmere, NY

Mark Edwin Kunik, M.D., Houston, TX  
Thomas Heyl Lampe, M.D., Kent, WA  
Eric Whitesell Larson, M.D., Minneapolis, MN  
Janet Marion Lawrence, M.D., Belmont, MA  
Arnold Lawrence Licht, M.D., Brooklyn, NY  
Benjamin Liptzin, M.D., Springfield, MA  
David Michael Liskov, M.D., Nanticoke, PA  
Linda Low, D.O., Huntington, NY  
William James Meek, M.D., Little Rock, AR  
Ravindra Kumar Mehta, M.D., Pittsburgh, PA  
Hindi T. Mermelstein, MD, Great Neck, NY  
Lynn E. Miller, M.D., Marquette, MI  
Asha Sharma Mishra, M.D., Chester, VA  
Sahana Misra, M.D., Portland, OR  
Gary Stuart Moak, M.D., Westborough, MA  
Andrew B. Molchon, M.D., Alexandria, VA  
Roy Christopher Monsour, M.D., Ligonier, PA  
Ronald Peter Monteverde, M.D., Hobbs, NM  
Harry E. Morgan, M.D., Glastonbury, CT  
Philip R. Muskin, M.D., New York, NY  
Draupathi Easwaran Nambudiri, M.D., Rye Brook, NY  
Paul A. Newhouse, M.D., Burlington, VT  
Grayson Swayze Norquist, M.D., Jackson, MS  
Thomas John Nowotny, M.D., Saint Louis, MO  
Mary Alice O'Dowd, M.D., New York, NY  
Irene Elizabeth Ortiz, M.D., Albuquerque, NM  
Oscar Pakier, M.D., Tarzana, CA  
Marcella Pascualy, M.D., Mercer Island, WA  
Ananda Priya Pathiraja, M.D., Martinez, GA  
Elaine Roslyn Peskind, M.D., Seattle, WA  
James M. Petit, M.D., Fort Thomas, KY  
Daniel Alan Plotkin, M.D., Los Angeles, CA  
Robert B. Portney, M.D., Andover, MA  
Elizabeth F. Pribor, M.D., Saint Louis, MO  
Joan Prudic, M.D., New York, NY  
Sylvia Marie Purugganan, M.D., Nyack, NY  
Geetha Ramaswamy, M.D., Cincinnati, OH  
Stephen L. Read, M.D., San Pedro, CA  
Riaz Uddin Riaz, M.D., Bluefield, VA  
Sheila Lynn Roberts, M.D., Louisville, KY  
Robert Paul Roca, M.D., Baltimore, MD  
Leonard J. Rosen, M.D., Farmington Hills, MI  
Kenneth Ivan Rosenstein, M.D., Philadelphia, PA  
Marc Irwin Rothman, M.D., Cherry Hill, NJ  
Barry William Rovner, M.D., Narberth, PA  
Christopher Cornell Rowe, M.D., Cincinnati, OH  
Hal Ira Rubin, M.D., Plattsburgh, NY  
Teresa Anne Rummans, M.D., Rochester, MN  
Ingrid Eve Runden, M.D., Hampden, ME  
Bruce Lawrence Saltz, M.D., Boca Raton, FL  
David Anthony Sayles, M.D., Washington, DC  
Alan Louis Schneider, M.D., Sherman Oaks, CA  
Lon S. Schneider, M.D., Los Angeles, CA  
Robert T. Segraves, M.D., Shaker Heights, OH  
Gary Myron Seltman, M.D., Granger, IN  
Daniel D. Sewell, M.D., San Diego, CA

Roderick Emmanuel Shaner, M.D., Los Angeles, CA  
Stephen Fortus Signer, MDCM, San Diego, CA  
Pamela Sue Silverman, M.D., New Rochelle, NY  
Robert Ira Slayton, M.D., Wilkinsburg, PA  
Kevin Ray Smith, M.D., Portland, OR  
Mark Snowden, M.D., Seattle, WA  
Edward R. Sodaro Jr., M.D., Amityville, NY  
James E. Spar, M.D., Los Angeles, CA  
Susan Graeber Stabinsky, M.D., Armonk, NY  
Elliott M. Stein, M.D., P.A., San Francisco, CA  
Jonathan Taylor Stewart, M.D., St Petersburg, FL  
Daniel David Storch, M.D., Baltimore, MD  
Dean James Storer, M.D., Alexandria, VA  
David Lee Sultzer, M.D., Los Angeles, CA  
Ole Johannes Thienhaus, M.D., Tucson, AZ  
Robert Anthony Todd, M.D., Louisville, KY  
Debby Wen Tsuang, M.D., Seattle, WA  
Shiraj Adambhai Vahora, M.D., Lubbock, TX  
Melinda June Waldrop, M.D., Franklin, TN  
Julia Katherine Warnock, M.D., Ph.D., Tulsa, OK  
Edgar J. Weiss, M.D., Charleston, SC  
Paul H. Wick, M.D., Tyler, TX  
Jeffrey Charles Wilson, M.D., Wilkinsburg, PA  
Robert C. Young, M.D., White Plains, NY  
Traian Adrian Zisu, M.D., New York, NY

*The following were awarded maintenance of certification in April 2011.*

---

## **Forensic Psychiatry**

---

Robin Regina Ballina, M.D., Shakopee, MN  
David Allen Bartholomew, M.D., Chapel Hill, NC  
Andrew Clarke Blaine, M.D., Claremont, CA  
Robert Roy Braswell, M.D., Sarasota, FL  
Karen Howard Brody, M.D., Stamford, CT  
Montgomery Clayton Brower, M.D., Wellesley, MA  
Robert Stanley Brown Jr., M.D., Charlottesville, VA  
Philip J. Candilis, MD, DFAPA, Arlington, MA  
Annmarie Caracansi, M.D., Brookline, MA  
Gary Robert Collins, M.D., New York, NY  
Marc Andrew Colon, M.D., Shreveport, LA  
Patricia May Crellin, M.D., Phoenix, AZ  
Karla Lynn de Beck, M.D., Chapel Hill, NC  
Laura Lee Downs, M.D., Floral Park, NY  
Donald Dravis, M.D., Tualatin, OR  
Lawrence Farago, M.D., New Hartford, NY  
Tonya Anne Foreman, M.D., Carmel, IN  
Patrick Kevin Fox, M.D., Denver, CO  
Scott Andrew Freeman, M.D., Newton, MA  
Velda Jean Givens, D.O., Palmetto, GA  
Daphne Ann Glindmeyer, M.D., Gretna, LA  
Stephen Bruce Goldberg, M.D., Clarksville, MD  
Alice Ann Hale, M.D., Columbus, OH  
Ian James Heath, M.D., C.M., Eden Prairie, MN  
Linda Joyce Hughes, D.O., Sun Prairie, WI

Joel Akande Idowu, M.D., Staten Island, NY  
John Charles Kennedy, M.D., Cincinnati, OH  
Munazzah Khawaja, M.D., Montgomery, AL  
Angela Kim Lee, M.D., Highland, MD  
James Lyle Knoll IV, M.D., Syracuse, NY  
Michal Kunz, M.D., Yorktown Heights, NY  
Scott Jerome Lance, M.D., Ashland, KY  
Jeffrey Lee Metzner, M.D., Denver, CO  
Susan Annette Minchin, M.D., Ph.D., Saint Louis, MO  
Stephen Anthony Montgomery, M.D., Nashville, TN  
Anand Pandya, M.D., Los Angeles, CA  
Rodrigo Ariel Pizarro, M.D., New York, NY  
Brenda Lynn Planck, M.D., Haddam, CT  
Marguerite Raffio Poreda, M.D., Naples, FL  
Robert John Rawski, M.D., New Berlin, WI  
Stephen Wayne Robinson, M.D., Springfield, IL  
Robert Leroy Rollins Jr., M.D., Raleigh, NC  
Jonathan Howard Rootenberg, M.D., Toronto, ON  
Pradeep Kumar Roy, M.D., Kingwood, TX  
Christopher Wyke Sangdahl, M.D., Upland, CA  
Kevin Lynn Smith, M.D., Saugerties, NY  
Annie Goldie Steinberg, M.D., Narberth, PA  
Charles Rainey Vance, M.D., Ph.D., Hillsborough, NC  
Damon Muir Walcott, M.D., Sacramento, CA  
Thomas Patrick Welch, M.D., Portland, OR  
Paul David Whitehead, M.D., Salt Lake City, UT
